# Supplementary material for: Multiorgan impairment in low-risk individuals with post-COVID-19 syndrome: a prospective, community-based study
Source: PubMed Central journal article supplement (PMC8727683; doi:10.1136/bmjopen-2020-048391), 2021-03-30
Supplement: bmjopen-2020-048391.draft_revisions.pdf [file bmjopen-2020-048391.draft_revisions.pdf]

# BMJ Open

BMJ Open is committed to open peer review. As part of this commitment we make the peer review history of every article we publish publicly available.

When an article is published we post the peer reviewers' comments and the authors' responses online. We also post the versions of the paper that were used during peer review. These are the versions that the peer review comments apply to.

The versions of the paper that follow are the versions that were submitted during the peer review process. They are not the versions of record or the final published versions. They should not be cited or distributed as the published version of this manuscript.

BMJ Open is an open access journal and the full, final, typeset and author-corrected version of record of the manuscript is available on our site with no access controls, subscription charges or pay-per-view fees (<http://bmjopen.bmj.com>).

If you have any questions on BMJ Open's open peer review process please email [info.bmjopen@bmj.com](mailto:info.bmjopen@bmj.com)

# BMJ Open

## Multi-organ impairment in low-risk individuals with post-COVID syndrome

|                               |                                                                                                                                                                                                                                                                                                                                                                                                                                                                                                                                                                                                                                                                                                                                                                                                                                                                                                                                                                                                                                                                                                          |
|-------------------------------|----------------------------------------------------------------------------------------------------------------------------------------------------------------------------------------------------------------------------------------------------------------------------------------------------------------------------------------------------------------------------------------------------------------------------------------------------------------------------------------------------------------------------------------------------------------------------------------------------------------------------------------------------------------------------------------------------------------------------------------------------------------------------------------------------------------------------------------------------------------------------------------------------------------------------------------------------------------------------------------------------------------------------------------------------------------------------------------------------------|
| Journal:                      | <i>BMJ Open</i>                                                                                                                                                                                                                                                                                                                                                                                                                                                                                                                                                                                                                                                                                                                                                                                                                                                                                                                                                                                                                                                                                          |
| Manuscript ID                 | bmjopen-2020-048391                                                                                                                                                                                                                                                                                                                                                                                                                                                                                                                                                                                                                                                                                                                                                                                                                                                                                                                                                                                                                                                                                      |
| Article Type:                 | Original research                                                                                                                                                                                                                                                                                                                                                                                                                                                                                                                                                                                                                                                                                                                                                                                                                                                                                                                                                                                                                                                                                        |
| Date Submitted by the Author: | 26-Dec-2020                                                                                                                                                                                                                                                                                                                                                                                                                                                                                                                                                                                                                                                                                                                                                                                                                                                                                                                                                                                                                                                                                              |
| Complete List of Authors:     | Dennis, Andrea; Perspectum Diagnostics Ltd, Innovation Wamil, Malgorzata ; Great Western Hospital Foundation NHS Trust, Department of Cardiology<br>Alberts, Johann; Alliance Medical Limited<br>Oben, Jude; Guy's and St Thomas' NHS Foundation Trust, Department of Gastroenterology<br>Cuthbertson, Daniel; University of Liverpool, Institute of Cardiovascular and Metabolic Medicine<br>Wootton, Dan; University of Liverpool Institute of Infection and Global Health; Liverpool University Hospitals NHS Foundation Trust, Department of Respiratory Research<br>Crooks, Michael; Hull and East Yorkshire Hospitals NHS Trust, Department of Respiratory Medicine<br>Gabbay, Mark; University of Liverpool, 12Institute of Population Health Sciences<br>Brady, Mlchael; Perspectum Diagnostics Ltd<br>Hishmeh, Lyth; London<br>Attree, Emily; London<br>Heightman, Melissa; University College London Hospitals NHS Foundation Trust, Department of Medicine<br>Banerjee, Rajarshi; Perspectum Diagnostics Ltd<br>Banerjee, Amitava; University College London, Institute of Health Informatics |
| Keywords:                     | COVID-19, EPIDEMIOLOGY, Health policy < HEALTH SERVICES ADMINISTRATION & MANAGEMENT, Public health < INFECTIOUS DISEASES, PUBLIC HEALTH                                                                                                                                                                                                                                                                                                                                                                                                                                                                                                                                                                                                                                                                                                                                                                                                                                                                                                                                                                  |
|                               |                                                                                                                                                                                                                                                                                                                                                                                                                                                                                                                                                                                                                                                                                                                                                                                                                                                                                                                                                                                                                                                                                                          |

SCHOLARONE™  
Manuscripts

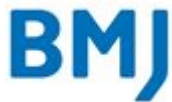

I, the Submitting Author has the right to grant and does grant on behalf of all authors of the Work (as defined in the below author licence), an exclusive licence and/or a non-exclusive licence for contributions from authors who are: i) UK Crown employees; ii) where BMJ has agreed a CC-BY licence shall apply, and/or iii) in accordance with the terms applicable for US Federal Government officers or employees acting as part of their official duties; on a worldwide, perpetual, irrevocable, royalty-free basis to BMJ Publishing Group Ltd ("BMJ") its licensees and where the relevant Journal is co-owned by BMJ to the co-owners of the Journal, to publish the Work in this journal and any other BMJ products and to exploit all rights, as set out in our [licence](#).

The Submitting Author accepts and understands that any supply made under these terms is made by BMJ to the Submitting Author unless you are acting as an employee on behalf of your employer or a postgraduate student of an affiliated institution which is paying any applicable article publishing charge ("APC") for Open Access articles. Where the Submitting Author wishes to make the Work available on an Open Access basis (and intends to pay the relevant APC), the terms of reuse of such Open Access shall be governed by a Creative Commons licence – details of these licences and which [Creative Commons](#) licence will apply to this Work are set out in our licence referred to above.

Other than as permitted in any relevant BMJ Author's Self Archiving Policies, I confirm this Work has not been accepted for publication elsewhere, is not being considered for publication elsewhere and does not duplicate material already published. I confirm all authors consent to publication of this Work and authorise the granting of this licence.

## Multi-organ impairment in low-risk individuals with post-COVID syndrome

Dennis A, Wamil M, Alberts J, Oben J, Cuthbertson D, Wootton D, Crooks M, Gabbay M,  
Brady M, Hishmeh L, Attree E, Heightman M, Banerjee R\*, Banerjee A\*

Andrea Dennis PhD<sup>1</sup>, *Head of Biomarker Science, Perspectum*

[andrea.dennis@perspectum.com](mailto:andrea.dennis@perspectum.com)

Malgorzata Wamil PhD<sup>2, 3</sup> *Consultant Cardiologist* [gosia.wamil@googlemail.com](mailto:gosia.wamil@googlemail.com)

Johann Alberts MBBCh<sup>4</sup>, *Medical Director* [jalberts@alliance.co.uk](mailto:jalberts@alliance.co.uk)

Jude Oben PhD<sup>5, 6</sup>, *Consultant Gastroenterologist/Hepatologist and Reader in Experimental Hepatology* [jude.1.oben@kcl.ac.uk](mailto:jude.1.oben@kcl.ac.uk)

Daniel Cuthbertson PhD<sup>7, 8</sup>, *Professor of Diabetes and Consultant Physician*  
[dan.cuthbertson@liverpool.ac.uk](mailto:dan.cuthbertson@liverpool.ac.uk)

Daniel Wootton PhD<sup>8, 9</sup>, *Senior Fellow and Consultant Respiratory Physician*  
[D.G.Wootton@liverpool.ac.uk](mailto:D.G.Wootton@liverpool.ac.uk)

Michael Crooks PhD<sup>10, 11</sup>, *Senior Clinical Lecturer in Respiratory Medicine and Consultant Respiratory Physician* [michael.crooks@hey.nhs.uk](mailto:michael.crooks@hey.nhs.uk)

Mark Gabbay PhD<sup>12</sup>, *Professor of General Practice and General Practitioner*  
[M.B.Gabbay@liverpool.ac.uk](mailto:M.B.Gabbay@liverpool.ac.uk)

Michael Brady PhD<sup>1, 13</sup>, *Professor of Oncological Imaging and Chair, Perspectum*  
[Michael.Brady@perspectum.com](mailto:Michael.Brady@perspectum.com)

Lyth Hishmeh BSc<sup>14</sup>, *Member, Long COVID SOS* [lythb7@hotmail.com](mailto:lythb7@hotmail.com)

Emily Attree MBBS<sup>15</sup>, *salariated general practitioner and Founder, UKDoctors#Longcovid*  
[emily.attree@nhs.net](mailto:emily.attree@nhs.net)

Melissa Heightman PhD<sup>16</sup>, *Consultant Respiratory Physician* [melissa.heightman1@nhs.net](mailto:melissa.heightman1@nhs.net)

Rajarshi Banerjee DPhil\*<sup>1, 3</sup>, *Honorary Consultant Physician and Chief Executive, Perspectum* [rajarshi.banerjee@perspectum.com](mailto:rajarshi.banerjee@perspectum.com)

Amitava Banerjee DPhil\*<sup>16, 17, 18</sup>, *Associate Professor of Clinical Data Science and Honorary Consultant Cardiologist* [ami.banerjee@ucl.ac.uk](mailto:ami.banerjee@ucl.ac.uk)

On behalf of the COVERSCAN study investigators (listed at the end of manuscript)

<sup>1</sup>*Perspectum, 5520 John Smith Drive, Oxford, OX4 2LL, UK*

<sup>2</sup>*Department of Cardiology, Great Western Hospitals NHS Foundation Trust*

<sup>3</sup>*Nuffield Department of Medicine, Oxford University Hospitals NHS Foundation Trust*

<sup>4</sup>*Alliance Medical Limited, Icen Centre, Warwick Technology Park, Warwick, CV34 6DA*

<sup>5</sup>*Department of Gastroenterology, Guy's and St Thomas' NHS Foundation Trust, London*

<sup>6</sup> *Institute for Liver and Digestive Health, University College London*

<sup>7</sup> *Institute of Cardiovascular and Metabolic Medicine, University of Liverpool*

<sup>8</sup> *Department of Medicine, Liverpool University Hospitals NHS Foundation Trust, Liverpool*

<sup>9</sup> *Institute of Infection & Global Health, University of Liverpool*

<sup>10</sup> *Institute of Clinical and Applied Health Research, University of Hull*

<sup>11</sup> *Department of Respiratory Medicine, Hull and East Yorkshire Hospitals NHS Trust, Hull.*

<sup>12</sup> *Institute of Population Health Sciences, University of Liverpool*

<sup>13</sup> *Department of Oncology, University of Oxford, Oxford.*

<sup>14</sup> *Long COVID SOS, UK*

<sup>15</sup> *UKDoctors#Longcovid, London*

<sup>16</sup> *Department of Medicine, University College London Hospitals NHS Trust, 235 Euston Road, London, UK*

<sup>17</sup> *Institute of Health Informatics, University College London, 222 Euston Road, London, UK*

<sup>18</sup> *Barts Health NHS Trust, The Royal London Hospital, Whitechapel Rd, London, UK*

\*joint senior author

□ **Corresponding authors:** [ami.banerjee@ucl.ac.uk](mailto:ami.banerjee@ucl.ac.uk); [rajarshi.banerjee@perspectum.com](mailto:rajarshi.banerjee@perspectum.com)

## **Article summary**

### **Strengths and limitations of this study**

- This is an ongoing, prospective, longitudinal COVID-19 recovery study with biochemical and imaging characterisation of organ function, starting in April before recognition of “long-COVID”, proper testing availability and prospective COVID-19-related research.
- We included comparison with healthy, age-matched controls, although not matched for sex or baseline comorbidities.
- We did not explore different controls, e.g. individuals with post-flu symptoms, COVID-19 without symptoms or from general clinics.
- The study population was not ethnically diverse, despite disproportionate COVID-19 impact in non-white individuals.

- To limit interaction and exposure between trial team and patients, pulse oximetry, spirometry, MRI assessment of brain and muscle function were not included from the outset.

### **Key Message**

In a cohort of individuals at low-risk of COVID-19 mortality, who contracted low-severity COVID-19, but remained symptomatic, there was evidence of impairment in the pancreas, heart, lung, kidneys and liver four months after the onset of COVID-19. Organ impairment was associated with higher levels of symptoms, in particular cardiac impairment. Our research suggests 'long-COVID' symptoms may, in some cases be explained by subclinical organ impairment. Longitudinal studies combining symptom trajectory and assessment (clinical, biochemical, physiological and imaging) will enable us to characterise the basis for full and complete recovery post-COVID, longer-term complications, ongoing symptoms, and effective pathways of care.

## Summary box

### What is already known on this topic

- There are no prior studies of medium- or long-term multi-organ impairment due to COVID-19.
- Prior studies have focused on acute phase of illness, hospitalised patients and “high-risk” individuals based on age and underlying conditions.
- Without longer-term data including lower risk individuals, full impact of the pandemic cannot be assessed and health system responses cannot be planned.

### What this study adds

- Among 201 individuals at low risk of COVID-19 mortality, four months following SARS-CoV-2 infection, 42% had  $\geq 10$  symptoms, and 70% had mild impairment in at least one organ.
- Follow-up of multi-organ function may be necessary in individuals with post-COVID syndrome, and management of underlying conditions should be prioritised before and after infection.
- The best prevention strategy for post COVID syndrome is suppression of the infection rate.

1  
2  
3  
4  
5  
6  
7  
8  
9  
10  
11  
12  
13  
14  
15  
16  
17  
18  
19  
20  
21  
22  
23  
24  
25  
26  
27  
28  
29  
30  
31  
32  
33  
34  
35  
36  
37  
38  
39  
40  
41  
42 **Abstract**  
43  
44

45 **Objective:** To assess medium-term organ impairment in symptomatic individuals following  
46 recovery from acute SARS-CoV2 infection.  
47  
48

49 **Design:** Baseline findings from a prospective, observational cohort study.  
50  
51

52 **Setting:** Community-based individuals from two UK centres between 1 April and 14 September  
53  
54  
55 2020.  
56  
57  
58  
59  
60



1  
2  
3  
4 **Participants:** Individuals  $\geq 18$  years with persistent symptoms following recovery from acute  
5  
6 SARS-CoV-2 infection; and age-matched healthy controls.  
7

8  
9 **Intervention:** Assessment of symptoms by standardised questionnaires (EQ-5D-5L,  
10  
11 Dyspnoea-12) and organ-specific metrics by biochemical assessment and quantitative  
12  
13 magnetic resonance imaging (MRI).  
14

15  
16 **Main outcome measures:** Severe post-COVID syndrome defined as ongoing respiratory  
17  
18 symptoms and/or moderate functional impairment in activities of daily living. Single and multi-  
19  
20 organ impairment (heart, lungs, kidneys, liver, pancreas, spleen) by consensus definitions at  
21  
22 baseline investigation.  
23  
24

25  
26 **Results:** 201 individuals (mean age 45, range 21-71) years, 71% female, 88% white, 32%  
27  
28 healthcare workers) completed baseline assessment (median 141 days following SARS-CoV-  
29  
30 2 infection, IQR 110-162). The study population was low-risk for COVID-19 mortality (obesity:  
31  
32 20%, hypertension: 7%; type 2 diabetes: 2%; heart disease: 5%), with only 19% hospitalised  
33  
34 with COVID-19. 42% of individuals had ten or more symptoms, and 60% had severe post-  
35  
36 COVID syndrome. Fatigue (98%), muscle aches (87%), breathlessness (88%) and headaches  
37  
38 (83%) were most frequently reported. Mild organ impairment was present in heart (26%), lungs  
39  
40 (11%), kidneys (4%), liver (28%), pancreas (40%), and spleen (4%), with single and multi-  
41  
42 organ impairment in 70% and 29% respectively. Hospitalisation was associated with older age  
43  
44 ( $p=0.001$ ), non-white ethnicity ( $p=0.016$ ), increased liver volume ( $p<0.0001$ ), pancreatic  
45  
46 inflammation ( $p<0.01$ ), and fat accumulation in the liver ( $p<0.05$ ) and pancreas ( $p<0.01$ ).  
47  
48 Severe post-COVID syndrome was associated with radiological evidence of cardiac damage  
49  
50 (myocarditis) ( $p<0.05$ ).  
51  
52  
53  
54  
55  
56  
57  
58  
59  
60

1  
2  
3 **Conclusions:** In individuals at low risk of COVID-19 mortality with ongoing symptoms, 70%  
4  
5 have impairment in one or more organs four months after initial COVID-19 symptoms, with  
6  
7 implications for healthcare and public health, which have assumed low risk in young people  
8  
9 with no comorbidities.  
10  
11

12  
13 **Study registration:** <https://clinicaltrials.gov/ct2/show/NCT04369807>  
14  
15

## 16 17 18 19 20 21 22 23 24 25 26 27 **Introduction**

28  
29 Early in the COVID-19 pandemic, research and clinical practice focused on pulmonary  
30  
31 manifestations[1]. There is increasing evidence for direct multi-organ effects[2-7], as well as  
32  
33 indirect effects on other organ systems and disease processes, such as cardiovascular  
34  
35 diseases and cancers, through changes in healthcare delivery and patient behaviours[8-10].  
36  
37 The clear long-term impact on individuals and health systems underlines the urgent need for  
38  
39 a whole body approach with assessment of all major organ systems following SARS-CoV-2  
40  
41 (Severe acute respiratory syndrome-coronavirus 2) infection.  
42  
43  
44  
45  
46  
47  
48

49  
50 COVID-19 is the convergence of an infectious disease, under-treated non-communicable  
51  
52 diseases and social determinants of health, described as a “syndemic”[11]. Pre-existing non-  
53  
54 communicable diseases and risk factors predict poor COVID-19 outcomes, whether intensive  
55  
56 care admission or mortality[10]. Research has emphasised acute SARS-CoV-2 infection,  
57  
58 hospitalised individuals, and COVID-19 mortality[12-14], which is likely to under-estimate the  
59  
60

1  
2  
3 true burden of COVID-19-related disease. Among those surviving acute infection, 10% report  
4  
5 persistent symptoms for 12 weeks or longer after initial infection (“long-COVID”, or “post  
6  
7 COVID syndrome”, PCS)[15]. However, PCS is yet to be fully defined[16-19]. Neither severity  
8  
9 of symptoms, nor medium- and long-term pathophysiology across organ systems, nor the  
10  
11 appropriate control populations are understood.  
12  
13  
14  
15

16  
17  
18 UK government policies have emphasised excess mortality risk in moderate- and high-risk  
19  
20 conditions, including “shielding”[10] and commissioning of a risk calculator to identify those at  
21  
22 highest risk of COVID-19 severity and mortality[20]. These policies assume that younger  
23  
24 individuals without apparent underlying conditions are at low risk. However, unlike symptoms  
25  
26 following critical illness[21] or acute phase of other coronavirus infections[22], symptoms in  
27  
28 PCS are commonly reported in individuals with low COVID-19 mortality risk, e.g. female,  
29  
30 young and no chronic co-morbidities[13]. The potential scale of PCS in “lower-risk” individuals,  
31  
32 representing up to 80% of the population[3], necessitates urgent policies across countries to  
33  
34 monitor[23], treat[18] and pay[24] for long-term implications of COVID-19, and to mitigate  
35  
36 impact on healthcare utilisation and economies.  
37  
38  
39  
40  
41  
42  
43

44 Therefore, in a pragmatic, prospective cohort of individuals with persistent symptoms following  
45  
46 recovery from acute SARS-CoV2 infection and at low risk of COVID-19 mortality, we  
47  
48 investigated: (i) multi-organ impairment compared with healthy, age-matched controls; and (ii)  
49  
50 associations between symptoms and multi-organ impairment; and (iii) impact of hospitalisation  
51  
52 and severity of symptoms.  
53  
54  
55  
56  
57  
58  
59  
60

## **Methods**

### *Patient population and study design*

In an ongoing, prospective study, participants were recruited either in response to advertising about the study or clinical specialist referral at two UK research imaging sites (Perspectum, Oxford and Mayo Clinic Healthcare, London) between 1 April 2020 and 14 September 2020, completing baseline assessment by 14 September 2020 (**Figure 1**). Participants were eligible for enrolment with laboratory confirmed SAR-COV2 infection (tested SARS-CoV-2-positive by oro/nasopharyngeal swab by reverse-transcriptase-polymerase-chain reaction (n=62), a positive antibody test (n=63), or with strong clinical suspicion of infection with typical symptoms/signs and assessed as highly likely to have COVID-19 by two independent clinicians (n=73)). Exclusion criteria were: symptoms of active respiratory viral infection (temperature >37.8°C or three or more episodes of coughing in 24 hours); hospital discharge in the last 7 days; and contraindications to MRI, including: implanted pacemakers, defibrillators, other metallic implanted devices and claustrophobia. All participants gave written informed consent.

### **To assess the burden of multi-organ involvement after SARS-CoV2 infection**

Assessment included patient-reported validated questionnaires (quality of life, EQ-5D-5L[25], and dyspnoea-12[26]), fasting biochemical investigations (listed in **Supplementary Methods**) and multi-organ MRI. We selected MRI as the imaging modality (as in UK Biobank) due to: (1) safety (no radiation exposure, no need for intravenous contrast, and minimal contact with the radiographer); (2) quantitative reproducibility (>95% acquisition and image processing success rate); (3) capacity for information sharing (digital data repository for independent analysis and research); and (4) rapid scalability (35-minute scan to phenotype lung, heart, kidney, liver, pancreas and spleen). PCS was classified as “severe” (defined as persistent

1  
2  
3 breathlessness,  $\geq 10$  on the dyspnoea-12 score, or reported moderate or greater problems  
4  
5 with usual activities on EQ-5D-5L), or “moderate”. These thresholds were selected as the  
6  
7 dyspnoea-12 has been correlated with the MRC dyspnoea grade, where level 3 warrants  
8  
9 referral to rehabilitation services[26], and with EQ-5D-5L, less than 8% of the general  
10  
11 population report moderate or greater problems with usual activities[27].  
12  
13  
14

### 15 **Magnetic Resonance Image Analysis**

16  
17 Multi-organ MRI data were collected at both study sites (Oxford: MAGNETOM Aera 1.5T,  
18  
19 Mayo Healthcare London; MAGNETOM Vida 3T; both from Siemens Healthcare, Erlangen,  
20  
21 Germany). The COVERSCAN multi-parametric MRI assessment typically required 35 minutes  
22  
23 per patient, including lungs, heart, liver, pancreas, kidneys and spleen by standardised  
24  
25 methodology (**Supplementary methods**). In brief, we assessed inflammation of the heart,  
26  
27 kidneys, liver and pancreas with quantitative T1-relaxation mapping, lung function was  
28  
29 characterised with a dynamic structural T2-weighted lung scan measuring relaxed vital  
30  
31 capacity, ectopic fat accumulation in the liver and pancreas from proton density fat fraction  
32  
33 and volume of the liver and spleen measured from T1-weighted structural scan.  
34  
35  
36  
37  
38

### 39 **Definition of organ impairment**

40  
41 To determine impairment for each organ, we compared MRI-derived measurements from  
42  
43 heart, lungs, kidney, liver, pancreas and spleen with reference ranges (**Table S1**), which were  
44  
45 established as mean  $\pm$  2 standard deviations from the healthy, age-matched control subjects  
46  
47 (n=36)(**Figure S1**), and validated by scoping literature review[28]. We defined organ  
48  
49 impairment if quantitative T1 mapping was outside reference ranges for heart, kidney, liver  
50  
51 and pancreas, reduced pulmonary dynamic measurements in the lungs or there was evidence  
52  
53 of hepatomegaly, splenomegaly or ectopic fat accumulation.  
54  
55  
56  
57

### 58 **Patient and public involvement and engagement**

1  
2  
3 Patients and public have directly, and indirectly, informed our research, from design to  
4 dissemination, with regular updates and webinars, including Q&A sessions with patients.  
5  
6

7  
8 Several clinician co-authors were indirectly informed by their patients in the COVERSCAN  
9 study (RB, AB) or PCS clinics (DW, MH, MC), who are members of organisations, such as  
10 Long Covid SOS (e.g. LH) and UKDoctors#Longcovid (e.g. EA). LH and EA have been  
11 involved in the research, interpretation of results, understanding implications of our results,  
12 and providing critical feedback for the manuscript.  
13  
14  
15  
16  
17  
18

### 19 **Statistical analysis**

20  
21 We performed all analyses using R version 3.6.1, using descriptive statistics to summarise  
22 baseline characteristics, and considering a p-value less than 0.05 as statistically significant.  
23  
24 Mean and standard deviation (SD) were used for normally distributed-continuous, median with  
25 interquartile range (IQR) for non-normally distributed, and frequency and percentage for  
26 categorical variables, respectively. We compared mean differences in quantitative organ  
27 metrics for hospitalised versus not hospitalised and moderate versus severe PCS using  
28 Kruskal-Wallis test (Fisher's exact test for differences in binary outcomes). We defined multi-  
29 organ impairment as  $\geq 2$  organs with metrics outside the reference range. We investigated  
30 associations between multi-organ impairment and (i) being hospitalised and (ii) severe PCS  
31 with multivariate logistic regression models, adjusting for age, sex and BMI. Associations  
32 between organ impairment and symptoms were visually assessed using heat map techniques.  
33  
34  
35  
36  
37  
38  
39  
40  
41  
42  
43  
44  
45  
46  
47  
48  
49 For group-wise comparison for absolute values between cases and healthy controls, we used  
50 Kruskal-Wallis test.  
51  
52  
53  
54  
55  
56  
57  
58  
59  
60

## **Results**

### **Overall study population**

#### *Baseline characteristics*

201 individuals were included (full details regarding hospitalisation: n=199; full questionnaire data to assign PCS severity: n=193). The mean age was 44.0 (range 21-71) years and median BMI 25.7 [IQR 23-28]. 71% of individuals were female, 88% were white, 32% were healthcare workers, 19% had been hospitalised with COVID-19. Assessment (symptoms, blood and MRI) was a median 141 (IQR 110-162) days after initial symptoms. Past medical history included smoking (3%), asthma (19%), obesity (20%), hypertension (7%), diabetes (2%) and prior heart disease (5%). The healthy control group had a mean age of 39 years (range 20-70), 40% were female and had a median BMI of 23 [IQR: 21-25] (**Table 1**).

#### *Symptoms*

Regardless of hospitalisation, the most frequently reported symptoms were fatigue (98%), shortness of breath (88%), muscle ache (87%), and headache (83%) (**Table 1**). 99% of individuals had four or more and 42% had ten or more symptoms. 70% of individuals reported  $\geq 13$  weeks off paid employment. Of the incidental structural findings observed on MRI (n=56), three were cardiac (atrial septal defect, bicuspid aortic valve and right atrial mass), one renal (hydronephrosis), and the rest were benign cysts.

#### *Biochemical investigations*

1  
2  
3  
4 Haematological investigations including mean corpuscular haemoglobin concentration  
5  
6 (MCHC, 24%), and renal, liver and lipid biochemistry, including potassium (38%), alanine  
7  
8 transferase (14%), lactate dehydrogenase (17%), triglycerides (11%) and cholesterol (42%)  
9  
10 were abnormally high in  $\geq 10\%$  of individuals. Bicarbonate (10%), phosphate (11%), uric acid  
11  
12 (11%), and transferrin saturation (19%) were abnormally low in  $\geq 10\%$  of individuals (**Table**  
13  
14 **S2**).

### 15 16 17 18 19 20 *Single and multi-organ impairment*

21  
22 Organ impairment was more common in PCS than healthy controls (**Figure 2, supplementary**  
23  
24 **results**). Impairment was present in the heart in 26% (myocarditis 19%; systolic dysfunction  
25  
26 9%), lung in 11% (reduced vital capacity), kidney in 4% (inflammation), liver in 28% (12%  
27  
28 inflammation; 21% ectopic fat, 10% hepatomegaly) and pancreas in 40% (15% inflammation,  
29  
30 38% ectopic fat); and spleen in 4% (splenomegaly). (**Table 2, Figure 2**). 70% of individuals  
31  
32 had impairment in at least one organ. 29% of individuals had multi-organ impairment, with  
33  
34 overlap across multiple organs (**Figure 3**).

### 35 36 37 38 39 40 41 42 43 44 **Hospitalised versus non-hospitalised**

45  
46 The hospitalised group were older ( $p=0.001$ ), had higher BMI ( $p=0.063$ ), were more likely to  
47  
48 be non-white ( $p=0.016$ ), and to report 'inability to walk' ( $p=0.009$ ) than non-hospitalised  
49  
50 individuals. There were no other statistically significant differences between risk factors or  
51  
52 symptoms between the groups. Impairment of liver, pancreas (e.g. ectopic fat in the pancreas  
53  
54 and liver, hepatomegaly) and  $\geq 2$  organs was higher in hospitalised individuals (all  $p$   
55  
56  $<0.05$ ) (**Table 2, Figure 3**). In multivariate analyses, adjusting for age, sex and BMI, liver  
57  
58  
59  
60



1  
2  
3  
4 volume remained significantly associated with hospitalisation ( $p=0.001$ ). Hospitalised  
5  
6 individuals had high triglycerides (30% vs 7.2%,  $p=0.002$ ), cholesterol (60 vs 38%,  $p=0.04$ )  
7  
8 and LDL-cholesterol (57 vs 31%,  $p=0.01$ ), and low transferrin saturation (38 vs 15%,  $p=0.01$ ),  
9  
10 compared with non-hospitalised individuals. ESR (13%), bicarbonate (12%), uric acid (16%),  
11  
12 platelet count (13%) and high-sensitivity CRP (15%) were high in  $\geq 10\%$  of hospitalised  
13  
14 individuals (**Table S2**).  
15  
16

### 17 18 19 20 **Severe versus moderate post COVID syndrome**

21  
22 60% ( $n=120$ ) had severe PCS, with 52% reporting persistent, moderate problems undertaking  
23  
24 usual activities (level 3 or greater in the relevant EQ-5D-5L question; 34% reported Dyspnoea-  
25  
26 12  $\geq 10$ ). Of those with severe PCS, 84% were not hospitalised, and 73% were female. There  
27  
28 was no differences in age, BMI or ethnicity between the groups. Individuals with severe PCS  
29  
30 were more likely to report shortness of breath ( $p<.001$ ), headache ( $p=0.019$ ), chest pain  
31  
32 ( $p=0.001$ ), abdominal pain ( $p=0.001$ ) and wheezing ( $p=0.039$ ). 25% of those with 'severe' PCS  
33  
34 had myocarditis compared to 12% with moderate PCS (unadjusted: 0.023; adjustment for age,  
35  
36 sex and BMI:  $p=0.04$ , **Figure S2**). Severe PCS was associated with higher mean cell  
37  
38 haemoglobin concentration (28% versus 17%), cholesterol (46.2 versus 32.8), CRP (10%  
39  
40 versus 3.8%) and ESR (10% versus 6%), than moderate PCS, but these differences were not  
41  
42 statistically significant (**Table S3**). Muscle aches, fever and coughing were common in severe  
43  
44 PCS, and headache was common in individuals with pancreas inflammation (**Figure 4**).  
45  
46  
47  
48  
49  
50  
51  
52  
53  
54  
55  
56  
57  
58  
59  
60

## Discussion

We report three findings in the first COVID-19 recovery study to evaluate medium-term, multi-organ impairment. First, in low-risk individuals, there were chronic symptoms and mild impairment in the heart, lung, liver, kidney and pancreas four months post-COVID-19, compared with healthy controls. Second, cardiac impairment was more common in severe PCS. Third, we demonstrate feasibility and potential utility of community-based multi-organ assessment for PCS.

### *Strengths and limitations*

Our study is an ongoing, prospective, longitudinal COVID-19 recovery study with biochemical and imaging characterisation of organ function, starting in April before recognition of “long-COVID”, proper testing availability and prospective COVID-19-related research. By recruiting ambulatory patients with broad inclusion criteria, we focused on a real world population at lower risk of COVID-19 severity and mortality. Our cardiac MRI protocol excluded gadolinium contrast due to concerns regarding COVID-19-related renal complications, relying on native T1 mapping to characterise myocardial inflammation non-invasively (previously validated for acute myocarditis)[29]. For organ impairment, we show association, not causation, and incidental findings are possible in asymptomatic individuals[30], but our findings are strengthened by comparison with healthy, age-matched controls, although not matched for sex or baseline comorbidities. Further studies may explore different controls, e.g. individuals with post-flu symptoms, COVID-19 without symptoms or from general clinics. We will

1  
2  
3 investigate duration, trajectory, complications and recovery for specific symptoms and organ  
4 impairment in the follow-up phase. Our study population was not ethnically diverse, despite  
5  
6 disproportionate COVID-19 impact in non-white individuals. To limit interaction and exposure  
7  
8 between trial team and patients, pulse oximetry, spirometry, MRI assessment of brain and  
9  
10 muscle function were not included from the outset.  
11  
12  
13  
14  
15

### 16 *Comparison with other studies*

17  
18 Common symptoms were fatigue, dyspnoea, myalgia, headache and arthralgia, despite low  
19 risk of COVID-19 mortality or hospitalisation. COVID-19 impact models have included age,  
20  
21 underlying conditions and mortality, but not morbidity, multi-organ impairment and chronic  
22  
23 diseases[31,32]. Even in non-hospitalised individuals, up to 10% of those infected have  
24  
25 PCS[15, 33], but studies of extra-pulmonary manifestations emphasise acute illness[34]. We  
26  
27 describe mild rather than severe organ impairment, but the pandemic's scale and high  
28  
29 infection rates in lower risk individuals signal medium- and longer- term COVID-19 impact,  
30  
31 which cannot be ignored in healthcare or policy spheres.  
32  
33  
34  
35  
36  
37

38 Acute myocarditis and cardiogenic shock[35] are documented in hospitalised COVID-19  
39 patients[6]. In American athletes, recent COVID-19 was associated with myocarditis[36].  
40  
41 Although causality cannot be attributed, and post-viral syndromes have included similar  
42  
43 findings[21], we show that one quarter of low-risk individuals with PCS have mild systolic  
44  
45 dysfunction or myocarditis. The significance of these findings and associations with  
46  
47 contemporaneous abnormal echocardiography findings and long-term myocardial fibrosis and  
48  
49 impairment are unknown. Cardiac impairment, a risk factor for severe COVID-19, may have a  
50  
51 role in PCS. Two further findings deserving investigation are pancreatic abnormalities, given  
52  
53 the excess diabetes risk reported in PCS(15), and the preponderance of healthcare workers  
54  
55  
56  
57  
58  
59  
60

1  
2  
3 at increased PCS risk (as observed for COVID-19 mortality), possibly due to higher viral  
4  
5  
6 burden.

7  
8  
9 PCS is likely to be a syndrome rather than a single condition. Despite an immunologic basis  
10  
11 for individual variations in COVID-19 progression and severity [37], prediction models have  
12  
13 high rates of bias, perform poorly[38], and focus on respiratory dysfunction and decisions for  
14  
15 ventilation in acutely unwell patients, rather than multi-organ function. Ongoing long-term  
16  
17 studies[39] exclude non-hospitalised, low-risk individuals. During a pandemic, we studied  
18  
19 subclinical organ impairment in PCS, showing low rates of incidental findings. As specialist  
20  
21 PCS services are rolled out[40,41], multi-organ assessment, monitoring and community  
22  
23 pathways have potential roles during and beyond COVID-19, but need to be evaluated.  
24  
25  
26

### 27 28 *Implications for research, clinical practice and public health*

29  
30 Our findings have three research implications. First, as countries face second waves, COVID-  
31  
32 19 impact models should include PCS, whether quality of life, healthcare utilisation, or  
33  
34 economic effects. Second, there is urgent need for multi-organ assessment, including blood  
35  
36 and imaging, as well as primary and secondary care data linkage, to define PCS. Third,  
37  
38 longitudinal studies of clustering of symptoms and organ impairment will inform health services  
39  
40 research to plan multidisciplinary care pathways. There are three management implications.  
41  
42 First, we signal the need for multi-organ monitoring in at least the medium-term, especially  
43  
44 extra-pulmonary sequelae. Care pathways involving MRI (with limited access in many clinical  
45  
46 settings) need evaluation versus other modalities to detect organ impairment (e.g. spirometry,  
47  
48 NT-pro-BNP, ECG, echocardiography, ultrasound and blood investigations). Second, until  
49  
50 effective vaccines and treatments are widely available, “infection suppression” (e.g. social  
51  
52 distancing, masks, physical isolation) is the prevention strategy. Third, whether understanding  
53  
54 baseline risk or multi-organ complications, PCS requires management across specialities (e.g.  
55  
56  
57  
58  
59  
60

1  
2  
3 cardiology, gastroenterology) and disciplines (e.g. epidemiology, diagnostics, laboratory  
4 science)(**Figure 5**).

5  
6  
7  
8  
9 *Conclusions*

10  
11 Our study suggests PCS has a physiological basis, with measurable patient-reported  
12 outcomes and organ impairment. Future research should address longer-term follow-up of  
13 organ function beyond symptoms and blood investigations, even in lower risk individuals;  
14 prioritisation for imaging, investigation and referral; and optimal care pathways. Health system  
15 responses should emphasise infection suppression, and management of pre- and post-  
16 COVID-19 risk factors and chronic diseases.  
17  
18  
19  
20  
21  
22  
23  
24  
25

26 **Contributorship statement:**

27  
28 Study design: AD, SK, RB, JA

29  
30 Patient recruitment: SK, RB, COVERSCAN team

31  
32 Data collection: MW, LM, COVERSCAN team

33  
34 Data analysis: AD, COVERSCAN team, AB

35  
36 Data interpretation: AB, AD, MW, RB

37  
38 Initial manuscript drafting: AB, AD, RB

39  
40 Critical review of early and final versions of manuscript: all authors

41  
42 Specialist input: cardiology (MW, AB); general medicine (RB, MH, DW, MC, GAD); long  
43 COVID (MH, MC, DW); imaging (MB, RB); statistics (AD); epidemiology/public health (AB);  
44 primary care (SK, MG); healthcare management (JA); patient and public involvement (LH,  
45 EA).  
46  
47  
48  
49  
50  
51  
52  
53

54  
55 *COVERSCAN study investigators*  
56  
57  
58  
59  
60

1  
2  
3  
4  
5  
6  
7  
8  
9  
10  
11  
12  
13  
14  
15  
16  
17  
18  
19  
20  
21  
22  
23  
24  
25  
26  
27  
28  
29  
30  
31  
32  
33  
34  
35  
36  
37  
38  
39  
40  
41  
42  
43  
44  
45  
46  
47  
48  
49  
50  
51  
52  
53  
54  
55  
56  
57  
58  
59  
60

Perspectum: Mary Xu, Faezah Sanaei-Nezhad, Andrew Parks, Andrea Borghetto, Matthew D Robson, Petrus Jacobs, John Michael Brady, Carla Cascone, Soubera Rymell, Jacky Law, Virginia Woolgar, Velko Tonev, Claire Herlihy, Rob Suriano, Tom Waddell, Henrike Puchta, Alessandra Borlotti, Arun Jandor, Freddie Greatrex, Robin Jones, Georgina Pitts, Ashleigh West, Marion Maguire, Anu Chandra, Naomi Jayaratne, Dali Wu, Stella Kin, Mike Linsley, Valentina Carapella, Isobel Gordon, George Ralli, John McGonigle, Darryl McClymont, Boyan Ivanov, James Oowler, Diogo Cunha, Tatiana Lim, Carlos Duncker, Madison Wagner, Marc Goldfinger, Adriana Roca, Charlotte Erpicum, Matthew David Kelly, Rexford D Newbould, Catherine J Kelly, Andrea Dennis, Sofia Mouchti, Arina Kazimianec, Helena Thomaidis-Briers, Rajarshi Banerjee

University College London: Amitava Banerjee

Great Western Hospitals NHS Foundation Trust: Malgorzata Wamil

University of Oxford: Yi-Chun Wang, Tom Waddell

Mayo Clinic: Sandeep Kapur, and Louise McLaughlin

### **Funding:**

This work was supported by the UK's National Consortium of Intelligent Medical Imaging (Industry Strategy Challenge Fund), Innovate UK (Grant 104688) and the European Union's Horizon 2020 research and innovation programme (agreement No 719445). The research was designed, conducted, analysed, and interpreted by the authors independently of the funding sources.

**Competing interests:** All authors have completed the ICMJE uniform disclosure form at [www.icmje.org/coi\\_disclosure.pdf](http://www.icmje.org/coi_disclosure.pdf). AD, RB and MB are employees of Perspectum. All other authors declare no financial relationships with any organisations that might have an interest

1  
2  
3 in the submitted work in the previous three years; no other relationships or activities that could  
4  
5  
6 appear to have influenced the submitted work.  
7

### 8 **Ethical approval**

9  
10 The study (<https://clinicaltrials.gov/ct2/show/NCT04369807>) had ethical approval  
11  
12 (20/SC/0185).  
13  
14

### 15 **Data sharing statement**

16  
17 Deidentified participant data are available from the corresponding authors on request.  
18  
19

### 20 **Transparency statement**

21  
22 AB affirms that this manuscript is an honest, accurate, and transparent account of the  
23  
24 reported study; that no important study aspects have been omitted; and that any  
25  
26 discrepancies from the study as planned (and, if relevant, registered) have been explained.  
27  
28

29  
30 **Dissemination to participants and related patient and public communities:** The results of this  
31  
32 study will be disseminated to relevant patient organisations (e.g. Long COVID SOS),  
33  
34 policymakers and health professionals.  
35  
36

37 **Provenance and peer review:** Not commissioned; externally peer reviewed.  
38  
39  
40  
41  
42  
43  
44  
45  
46  
47  
48  
49  
50  
51  
52  
53  
54  
55  
56  
57  
58  
59  
60

## References

1. World Health Organization. Clinical management of severe acute respiratory infection (SARI) when COVID-19 disease is suspected. Interim guidance 13 March 2020. <https://apps.who.int/iris/handle/10665/331446>
2. Pavon AG, Meier D, Samim D, Rotzinger DC, Fournier S, Marquis P, et al. First Documentation of Persistent SARS-Cov-2 Infection Presenting With Late Acute Severe Myocarditis. *Can J Cardiol.* 2020;36(8):1326.e5-1326.e7.
3. Puntmann VO, Carerj ML, Wieters I, Fahim M, Arendt C, Hoffmann J, et al. Outcomes of Cardiovascular Magnetic Resonance Imaging in Patients Recently Recovered from Coronavirus Disease 2019 (COVID-19). *JAMA Cardiol.* 2020;2019(11):1265–73.
4. Tabary M, Khanmohammadi S. Pathologic features of COVID-19: A concise review. *Pathol - Res Pract.* 2020;216(9): 153097.
5. Alqahtani SA, Schattenberg JM. Liver injury in COVID-19: The current evidence. *United Eur Gastroenterol J.* 2020;8(5):509–19.
6. Somasundaram NP, Ranathunga I, Ratnasamy V, Wijewickrama PSA, Dissanayake HA, Yogendranathan N, et al. The impact of SARS-Cov-2 virus infection on the endocrine system. *J Endocr Soc.* 2020;4(8):1–22.
7. Farouk SS, Fiaccadori E, Cravedi P, Campbell KN. COVID-19 and the kidney: what we think we know so far and what we don't. *J Nephrol.* 2020. Jul 20 : 1–6.



- 1
- 2
- 3
- 4 8. Lai A, Pasea L, Banerjee A, Denaxas S, Katsoulis M, Chang W, et al. Estimating
- 5 excess mortality in people with cancer and multimorbidity in the COVID-19
- 6 emergency. *BMJ Open*. 2020. Nov 17;10(11):e043828.
- 7
- 8 9. Banerjee A, Pasea L, Harris S, Gonzalez-Izquierdo A, Torralbo A, Shallcross L, et al.
- 9 Estimating excess 1-year mortality associated with the COVID-19 pandemic
- 10 according to underlying conditions and age: a population-based cohort study. *Lancet*.
- 11 2020;395(10238):1715–25.
- 12
- 13 10. Banerjee A, Chen S, Pasea L, Lai A, Katsoulis M, Denaxas S, et al. Excess deaths in
- 14 people with cardiovascular diseases during the COVID-19 pandemic. *Eur J Prev*
- 15 *Cardiol*. 2020. In press.
- 16
- 17 11. Horton R. Offline: COVID-19 is not a pandemic. *Lancet*. 2020;396(10255):874.
- 18
- 19 12. Shovlin CL, Vizcaychipi MP. Implications for COVID-19 triage from the ICNARC report
- 20 of 2204 COVID-19 cases managed in UK adult intensive care units. *Emerg Med J*.
- 21 2020;37(6):332–3.
- 22
- 23 13. Docherty AB, Harrison EM, Green CA, Hardwick HE, Pius R, Norman L, et al.
- 24 Features of 20 133 UK patients in hospital with covid-19 using the ISARIC WHO
- 25 Clinical Characterisation Protocol: Prospective observational cohort study. *BMJ*.
- 26 2020;369:1–12.
- 27
- 28 14. Williamson E, Walker A, Bhaskaran K, Bacon S, Curtis H, Mehrkar A, et al. Factors
- 29 associated with COVID-19-related death using OpenSAFELY. *Nature*. 2020;
- 30 584(7821):430-436.
- 31
- 32 15. Office for National Statistics. The prevalence of long COVID symptoms and COVID-
- 33 19 complications. 16 December 2020.
- 34 [https://www.ons.gov.uk/news/statementsandletters/theprevalenceoflongcovidsympto](https://www.ons.gov.uk/news/statementsandletters/theprevalenceoflongcovidsymptomsandcovid19complications)
- 35 [msandcovid19complications](https://www.ons.gov.uk/news/statementsandletters/theprevalenceoflongcovidsymptomsandcovid19complications)
- 36
- 37 16. Del Rio C, Collins L, Malani P. Long-term Health Consequences of COVID-19 Carlos.
- 38 *JAMA*. 2020;324(17).
- 39
- 40 17. Carfi A, Bernabei R, Landi F. Persistent Symptoms in Patients After Acute COVID-19.
- 41 *JAMA*. 2020;324(6):604–5.
- 42
- 43 18. Nabavi N. Long covid: How to define it and how to manage it. *BMJ*. 2020;370:m3489.
- 44
- 45 19. Greenhalgh T, Knight M, A'Court C, Buxton M, Husain L. Management of post-acute
- 46 covid-19 in primary care. *BMJ*. 2020;370.
- 47
- 48 20. National Institute for Health Research: New risk prediction model could help improve
- 49 guidance for people shielding from COVID-19. June 2020.
- 50 [https://www.nihr.ac.uk/news/new-risk-prediction-model-could-help-improve-guidance-](https://www.nihr.ac.uk/news/new-risk-prediction-model-could-help-improve-guidance-for-people-shielding-from-covid-19/25096)
- 51 [for-people-shielding-from-covid-19/25096](https://www.nihr.ac.uk/news/new-risk-prediction-model-could-help-improve-guidance-for-people-shielding-from-covid-19/25096)
- 52
- 53
- 54
- 55
- 56
- 57
- 58
- 59
- 60

- 1  
2  
3  
4 21. Hill AD, Fowler RA, Pinto R, Herridge MS, Cuthbertson BH, Scales DC. Long-term  
5 outcomes and healthcare utilization following critical illness - a population-based  
6 study. *Crit Care*. 2016;20(1):1–10.
- 7  
8 22. Perrin R. Into the looking glass: Post-viral syndrome post COVID-19. *Med*  
9 *Hypotheses*. 2020;144.
- 10  
11 23. George PM, Barratt SL, Condliffe R, Desai SR, Devaraj A, Forrest I, et al. Respiratory  
12 follow-up of patients with COVID-19 pneumonia. *Thorax*. 2020;75(11):1009–16.
- 13  
14 24. Jiang DH, McCoy RG. Planning for the Post-COVID Syndrome: How Payers Can  
15 Mitigate Long-Term Complications of the Pandemic. *J Gen Intern Med*.  
16 2020;35(10):3036–9.
- 17  
18 25. Janssen MF, Pickard AS, Golicki D, Gudex C, Niewada M, Scalone L, et al.  
19 Measurement properties of the EQ-5D-5L compared to the EQ-5D-3L across eight  
20 patient groups: A multi-country study. *Qual Life Res*. 2013;22(7):1717–27.
- 21  
22 26. Yorke J, Moosavi SH, Shuldham C, Jones PW. Quantification of dyspnoea using  
23 descriptors: development and initial testing of the Dyspnoea-12. *Thorax*.  
24 2010;65(1):21–6.
- 25  
26 27. Hobbins A, Barry L, Kelleher D, O'Neill C. The health of the residents of Ireland:  
27 Population norms for Ireland based on the EQ-5D-5L descriptive system – a cross  
28 sectional study. *HRB Open Res*. 2018;1:22.
- 29  
30 28. Raman B, Philip Cassar M, Tunnicliffe EM, Filippini N, Griffanti L, Alfaro-Almagro F, et  
31 al. Medium-term effects of SARS-CoV-2 infection on multiple vital organs, exercise  
32 capacity, cognition, quality of life and mental health, post-hospital discharge.  
33 *medRxiv*. 2020. 18 October 2020.  
34 <https://www.medrxiv.org/content/10.1101/2020.10.15.20205054v1>.
- 35  
36 29. Ferreira VM, Piechnik SK, Armellina ED, Karamitsos TD, Francis JM, Ntusi N, et al.  
37 Native T1-mapping detects the location, extent and patterns of acute myocarditis  
38 without the need for gadolinium contrast agents. 2014;16(1):1–11.
- 39  
40 30. Gibson LM, Paul L, Chappell FM, Macleod M, Whiteley WN, Salman RAS, et al.  
41 Potentially serious incidental findings on brain and body magnetic resonance imaging  
42 of apparently asymptomatic adults: Systematic review and meta-analysis. *BMJ*.  
43 2018;363: k4577.
- 44  
45 31. Gupta A, Madhavan M V., Sehgal K, Nair N, Mahajan S, Sehrawat TS, et al.  
46 Extrapulmonary manifestations of COVID-19. *Nat Med*. 2020;26(7):1017–32.
- 47  
48 32. Palmer K, Monaco A, Kivipelto M, Onder G, Maggi S, Michel JP, et al. The potential  
49 long-term impact of the COVID-19 outbreak on patients with non-communicable  
50 diseases in Europe: consequences for healthy ageing. *Aging Clin Exp Res [Internet]*.  
51  
52  
53  
54  
55  
56  
57  
58  
59  
60

- 1  
2  
3  
4 2020;32(7):1189–94.
- 5 33. Menni C, Valdes AM, Freidin MB, Sudre CH, Nguyen LH, Drew DA, et al. Real-time  
6 tracking of self-reported symptoms to predict potential COVID-19. *Nat Med*.  
7 2020;26(7):1037–40.
- 8  
9  
10 34. Mandal S, Barnett J, Brill S, Brown J, Denneny E, Hare S, et al. “Long-COVID”: a  
11 cross-sectional study of persisting symptoms, biomarker and imaging abnormalities  
12 following hospitalisation for COVID-19. *Thorax*. 2020; Nov 10;thoraxjnl-2020-215818.
- 13  
14 35. Chau VQ, Giustino G, Mahmood K, Oliveros E, Neibart E, Oloomi M, et al.  
15 Cardiogenic shock and hyperinflammatory syndrome in young males with COVID-19.  
16 *Circ Hear Fail*. 2020;556–9.
- 17  
18 36. Rajpal S, Tong MS, Borchers J, Zareba KM, Obarski TP, Simonetti OP, et al.  
19 Cardiovascular Magnetic Resonance Findings in Competitive Athletes Recovering  
20 from COVID-19 Infection. *JAMA Cardiol*. 2020;5–7.
- 21  
22 37. Mathew D, Giles JR, Baxter AE, Oldridge DA, Greenplate AR, Wu JE, et al. Deep  
23 immune profiling of COVID-19 patients reveals distinct immunotypes with therapeutic  
24 implications. *Science*. 2020; 369(6508):eabc8511.
- 25  
26 38. Wynants L, Van Calster B, Collins GS, Riley RD, Heinze G, Schuit E, et al. Prediction  
27 models for diagnosis and prognosis of covid-19: Systematic review and critical  
28 appraisal. *BMJ*. 2020;369 :m1328.
- 29  
30 39. PHOSP-COVID: Post-HOSPitalisation COVID-19 study. <https://www.phosp.org/>
- 31  
32 40. NHS to offer ‘long covid’ sufferers help at specialist centres.  
33 <https://www.england.nhs.uk/2020/10/nhs-to-offer-long-covid-help/>
- 34  
35 41. National Institute for Health and Care Excellence. COVID-19 rapid guideline:  
36 managing the long-term effects of COVID-19. 18 December 2020.  
37 <https://www.nice.org.uk/guidance/ng188>
- 38  
39  
40  
41  
42  
43  
44  
45  
46  
47  
48  
49  
50  
51  
52  
53  
54  
55  
56  
57  
58  
59  
60

1  
2  
3  
4  
5  
6  
7  
8  
9  
10  
11  
12  
13  
14  
15  
16  
17  
18  
19  
20  
21  
22  
23  
24  
25  
26  
27  
28  
29  
30  
31  
32 **Figures and Table Titles and Legends**  
33

34 Table 1: Baseline demographics and symptoms in 201 low-risk individuals with post COVID syndrome.  
35

36  
37 *\*Data are presented as count (%). Comparisons between managed at home vs hospitalised,  
38 and between moderate vs post-COVID syndrome were conducted using Fisher's exact test.  
39  
40  
41  
42  
43  
44*

45 Table 2: Evidence of organ impairment in 201 low-risk individuals with post COVID syndrome.  
46

47  
48 *\*Data are presented as count (%). Comparisons between managed at home vs hospitalised,  
49 and between moderate vs post-COVID syndrome were conducted using Fisher's exact test.  
50  
51  
52  
53  
54*

55 Figure 1: Flow from recruitment to enrolment of 201 patients with post COVID syndrome.  
56  
57  
58  
59  
60

1  
2  
3 Figure 2. Organ impairment in low-risk individuals with post COVID syndrome (n=201)  
4 compared to healthy controls (n=36).  
5  
6

7 *Significance: · p=0.05; \*p<0.05; \*\*p<0.01; \*\*\* p<.001.*  
8  
9

10  
11  
12  
13 Figure 3: Multi-organ impairment in low-risk individuals with post COVID syndrome by  
14 gender and hospitalisation.  
15  
16

17  
18 Figure 4: Reported symptoms and organ impairment in individuals with severe post COVID  
19 syndrome.  
20

21 *Darker red indicates higher percentage of reported symptoms per impaired organ.*  
22  
23

24  
25 Figure 5: Natural history of post COVID syndrome, the COVERSCAN study in low-risk  
26 individuals (n=201) and policy recommendations.  
27  
28  
29  
30  
31  
32  
33  
34  
35  
36  
37  
38  
39  
40  
41  
42  
43  
44  
45  
46  
47  
48  
49  
50  
51  
52  
53  
54  
55  
56  
57  
58  
59  
60

Table 3: Baseline demographics and symptoms in 201 low-risk individuals with post COVID syndrome.

|                                               | All Patients (n=201) | Healthy Controls (N=36) | P      | Not hospitalised (n=163) | Hospitalised (n=37) | P     | Moderate PCS (n=77) | Severe PCS (n=116) | p     |
|-----------------------------------------------|----------------------|-------------------------|--------|--------------------------|---------------------|-------|---------------------|--------------------|-------|
| <b>Age</b> (yrs, mean; sd)                    | 44 (11.0)            | 39 (12.4)               | 0.013  | 43 (10.9)                | 50 (10.0)           | 0.001 | 45 (12.2)           | 44 (10.0)          | 0.419 |
| <b>Female</b> (No, %)                         | 142 (70.6)           | 14 (38.9)               | 0.032  | 118 (72.4)               | 23 (62.2)           | 0.302 | 51 (66.2)           | 85 (73.3)          | 0.374 |
| <b>BMI</b> (kg.m <sup>-2</sup> ); median(IQR) | 25.7(22.7-28.1)      | 23.2 (21.4-23.1)        | <0.001 | 25.3 (22.7-27.7)         | 27.2 (23.1-31.0)    | 0.063 | 25.8 (22.7-27.9)    | 25.4 (22.5-28.2)   | 0.639 |
| <b>Ethnicity</b>                              |                      |                         |        |                          |                     |       |                     |                    |       |
| White                                         | 176 (87.6)           | 33 (91.7)               | 0.904  | 148 (90.8)               | 28 (75.7)           | 0.016 | 67 (87.0)           | 106 (91.4)         | 0.178 |
| Mixed                                         | 3 (1.5)              | 0 (0)                   |        | 3 (1.8)                  | 0 (0)               |       | 1 (1.3)             | 2 (1.7)            |       |
| South Asian                                   | 7 (3.5)              | 3 (8.3)                 |        | 4 (2.5)                  | 3 (8.1)             |       | 5 (6.5)             | 0 (0)              |       |
| Black                                         | 4 (2.0)              | 0 (0)                   |        | 1 (0.6)                  | 2 (5.4)             |       | 2 (2.6)             | 2 (1.7)            |       |
| <b>Comorbidities and risks</b>                |                      |                         |        |                          |                     |       |                     |                    |       |
| <b>Smoking</b>                                |                      |                         |        |                          |                     |       |                     |                    |       |
| Never                                         | 133 (66.2)           | 20 (60.6)               |        | 108 (66.3)               | 24 (64.9)           |       | 55 (71.4)           | 72 (61.7)          | 0.244 |
| Current                                       | 6 (3.0)              | 8 (24.2)                | <0.001 | 6 (3.7)                  | 0 (0)               | 0.641 | 3 (3.9)             | 3 (2.6)            |       |
| Ex-smoker                                     | 62 (30.8)            | 5 (15.2)                |        | 49 (30.1)                | 13 (35.1)           |       | 19 (24.7)           | 41 (35.3)          |       |
| <b>Health care worker</b>                     | 64 (31.8)            | 4 (12.1)                | 0.009  | 50 (30.7)                | 13 (35.1)           | 0.695 | 33 (42.9)           | 28 (24.1)          | 0.007 |
| <b>Asthma</b>                                 | 37 (18.4)            | 0 (0)                   | 0.002  | 34 (20.9)                | 3 (8.1)             | 0.099 | 13 (16.9)           | 22 (19.0)          | 0.849 |
| <b>BMI</b>                                    |                      |                         |        |                          |                     |       |                     |                    |       |
| ≥25 kg/m <sup>2</sup>                         | 113 (56.5)           | 7 (20)                  |        | 87 (53.7)                | 25 (67.6)           | 0.144 | 46 (60.5)           | 62 (53.4)          | 0.374 |
| ≥30 kg/m <sup>2</sup>                         | 40 (20.0)            | 0 (0)                   |        | 28 (17.3)                | 12 (32.4)           | 0.066 | 16 (21.1)           | 24 (20.7)          | 1.000 |
| <b>Hypertension</b>                           | 13 (6.5)             | 0 (0)                   | 0.001  | 11 (6.7)                 | 2 (5.4)             | 1.000 | 6 (7.8)             | 7 (6.0)            | 0.771 |
| <b>Diabetes</b>                               | 4 (2.0)              | 0 (0)                   | 0.104  | 4 (2.5)                  | 0 (0.0)             | 1.000 | 4 (5.2)             | 0 (0.0)            | 0.024 |
| <b>Previous heart disease</b>                 | 9 (4.5)              | 0 (0)                   | 0.001  | 8 (4.9)                  | 1 (2.7)             | 1.000 | 3 (3.9)             | 5 (4.3)            | 1.000 |
| <b>Symptoms</b>                               |                      |                         |        |                          |                     |       |                     |                    |       |

|                                                              |                |  |  |               |              |       |              |               |         |
|--------------------------------------------------------------|----------------|--|--|---------------|--------------|-------|--------------|---------------|---------|
| Fatigue                                                      | 196 (98.0)     |  |  | 159 (97.5)    | 37 (100.0)   | 1.000 | 73 (96.1)    | 115 (99.1)    | 0.302   |
| Shortness of breath                                          | 176 (88.0)     |  |  | 141 (86.5)    | 35 (94.6)    | 0.262 | 58 (76.3)    | 112 (96.6)    | <0.0001 |
| Muscle ache                                                  | 173 (86.5)     |  |  | 142 (87.1)    | 31 (83.8)    | 0.597 | 66 (86.8)    | 101 (87.1)    | 1.000   |
| Headache                                                     | 165 (82.5)     |  |  | 138 (84.7)    | 27 (73.0)    | 0.098 | 56 (73.7)    | 102 (87.9)    | 0.019   |
| Joint pain                                                   | 156 (78.0)     |  |  | 127 (77.9)    | 29 (78.4)    | 1.000 | 56 (73.7)    | 94 (81.0)     | 0.284   |
| Chest pain                                                   | 152 (76.0)     |  |  | 128 (78.5)    | 24 (64.9)    | 0.090 | 47 (61.8)    | 98 (84.5)     | 0.001   |
| Cough                                                        | 146 (73.0)     |  |  | 117 (71.8)    | 29 (78.4)    | 0.539 | 55 (72.4)    | 84 (72.4)     | 1.000   |
| Fever                                                        | 144 (72.0)     |  |  | 113 (69.3)    | 31 (83.8)    | 0.104 | 51 (67.1)    | 86 (74.1)     | 0.329   |
| Sore throat                                                  | 143 (71.5)     |  |  | 120 (73.6)    | 23 (62.2)    | 0.165 | 50 (65.8)    | 86 (74.1)     | 0.256   |
| Diarrhoea                                                    | 118 (59.0)     |  |  | 91 (55.8)     | 27 (73.0)    | 0.065 | 40 (52.6)    | 76 (65.5)     | 0.097   |
| Abnormal pain                                                | 108 (54.0)     |  |  | 91 (55.8)     | 17 (45.9)    | 0.361 | 30 (39.5)    | 75 (64.7)     | 0.001   |
| Wheezing                                                     | 98 (49.0)      |  |  | 75 (46.0)     | 23 (62.2)    | 0.101 | 30 (39.5)    | 64 (55.2)     | 0.039   |
| Inability to walk                                            | 80 (40.0)      |  |  | 58 (35.6)     | 22 (59.5)    | 0.009 | 24 (31.6)    | 50 (43.1)     | 0.130   |
| Runny nose                                                   | 68 (34.0)      |  |  | 55 (33.7)     | 13 (35.1)    | 0.85  | 24 (31.6)    | 41 (35.3)     | 0.642   |
| <b>Time interval</b>                                         |                |  |  |               |              |       |              |               |         |
| <b>Initial symptoms-to-assessment (days): median (IQR)</b>   | 141 (110, 162) |  |  | 141 (112-163) | 138 (97-150) | 0.106 | 121 (89-158) | 145 (121-163) | 0.001   |
| <b>COVID-19 positive-to-assessment (days): median, (IQR)</b> | 71 (41, 114)   |  |  | 68 (35-112)   | 105 (59-126) | 0.012 | 60 (43,98)   | 78 (34-119)   | 0.305   |

Table 4: Evidence of organ impairment in 201 low-risk individuals with post COVID syndrome.

| Measurement                                                  | All Patients (n=201) | Healthy Controls (n=36) | P     | Not hospitalised (n=163) | Hospitalised (n=37) | P     | Moderate PCS (n=77) | Severe PCS (n=116) | P     |
|--------------------------------------------------------------|----------------------|-------------------------|-------|--------------------------|---------------------|-------|---------------------|--------------------|-------|
| <b>HEART</b>                                                 |                      |                         |       |                          |                     |       |                     |                    |       |
| <b>Left ventricular ejection fraction (%)</b>                |                      |                         |       |                          |                     |       |                     |                    |       |
| • Normal (>51%)                                              | 190 (95.0)           | 35 (97.2)               | 0.699 | 155 (95.7)               | 33 (89.1)           | 0.124 | 72 (93.5)           | 111 (95.7)         | 0.353 |
| • Impaired (≤51%)                                            | 11 (5.0)             | 1 (2.8)                 |       | 7 (4.3)                  | 4 (10.1)            |       | 5 (6.4)             | 5 (4.3)            |       |
| <b>Left ventricular end diastolic volume (ml)</b>            |                      |                         |       |                          |                     |       |                     |                    |       |
| • >264ml in M; >206ml in W                                   | 8 (4.0)              | 1 (2.8)                 | 1.00  | 4 (2.5)                  | 4 (10.8)            | 0.040 | 4 (5.2)             | 4 (3.4)            | 0.715 |
| <b>Evidence of myocarditis</b>                               |                      |                         |       |                          |                     |       |                     |                    |       |
| • ≥ 3 segments with high T1 (≥1229ms at 3T; ≥1015ms at 1.5T) | 39 (19.4)            | 2 (5.6)                 | 0.053 | 30 (18.4)                | 8 (21.6)            | 0.647 | 9 (11.7)            | 29 (25.0)          | 0.027 |

1  
2  
3  
4  
5  
6  
7  
8  
9  
10  
11  
12  
13  
14  
15  
16  
17  
18  
19  
20  
21  
22  
23  
24  
25  
26  
27  
28  
29  
30  
31  
32  
33  
34  
35  
36  
37  
38  
39  
40  
41  
42  
43  
44  
45  
46

|                                              |                |                |        |                |               |         |               |               |       |
|----------------------------------------------|----------------|----------------|--------|----------------|---------------|---------|---------------|---------------|-------|
| <b>LUNGS</b>                                 |                |                |        |                |               |         |               |               |       |
| <b>Deep Breathing Fractional area change</b> | (n=17 missing) |                |        | (n=13 missing) | (n=3 missing) |         | (n=8 missing) | (n=7 missing) |       |
| • < 31%                                      | 21 (11.4)      | 1 (2.8)        | 0.138  | 17 (11.3)      | 4 (11.8)      | 1       | 7 (10.1)      | 13 (11.9)     | 0.811 |
| <b>KIDNEYS</b>                               |                |                |        |                |               |         |               |               |       |
| <b>Kidney cortex T1</b>                      | (n=3 missing)  |                |        | (n=3 missing)  |               |         | (n=2 missing) |               |       |
| • Normal (<1652 ms at 3T; <1227ms at 1.5T)   | 191 (96.5)     | 36 (100.0)     | 0.599  | 155 (96.9)     | 35 (94.6)     | 0.618   | 74 (98.7)     | 112 (96.6)    | 0.65  |
| • Impaired (≥1652 ms at 3T; ≥1227ms at 1.5T) | 7 (3.5)        | 0 (0.0)        |        | 5 (3.1)        | 2 (5.4)       |         | 1 (1.3)       | 4 (3.4)       |       |
| <b>PANCREAS</b>                              |                |                |        |                |               |         |               |               |       |
| <b>Pancreatic inflammation (T1 in ms)</b>    | (n=11 missing) | (n=13 missing) |        | (n=7 missing)  | (n=4 missing) |         | (n=4 missing) | (n=6 missing) |       |
| • Normal <803ms                              | 162 (85.3)     | 23 (100.0)     | 0.049  | 139 (89.1)     | 22 (66.7)     | 0.002   | 60 (82.2)     | 95 (86.4)     | 0.530 |
| • Impaired ≥803ms                            | 28 (14.7)      | 0 (0)          |        | 17 (10.9)      | 11 (33.3)     |         | 13 (17.8)     | 15 (13.6)     |       |
| <b>Pancreatic fat</b>                        |                | (n=4 missing)  |        |                |               |         |               |               |       |
| • Normal <4.6%                               | 122 (62.2)     | 30 (93.8)      | <0.001 | 107 (66.9)     | 14 (40.0)     | 0.004   | 44 (57.9)     | 72 (63.7)     | 0.449 |
| • Impaired ≥4.6%                             | 74 (37.8)      | 2 (6.2)        |        | 53 (33.1)      | 21 (60.0)     |         | 32 (42.1)     | 41 (36.3)     |       |
| <b>LIVER</b>                                 |                |                |        |                |               |         |               |               |       |
| <b>Liver Inflammation (cT1 in ms)</b>        | (n=1 missing)  |                |        | (n=1 missing)  |               |         | (n=1 missing) |               |       |
| • Normal <784ms                              | 177 (88.5)     | 36 (100)       | 0.030  | 148 (91.4)     | 28 (75.7)     | 0.018   | 69 (90.8)     | 101 (87.1)    | 0.494 |
| • Impaired ≥784ms                            | 23 (11.5)      | 0 (0)          |        | 14 (8.6)       | 9 (24.3)      |         | 7 (9.2)       | 15 (12.9)     |       |
| <b>Liver fat</b>                             |                |                |        |                |               |         |               |               |       |
| • Normal <4.8%                               | 159 (79.1)     | 34 (94.4)      | 0.034  | 134 (82.2)     | 24 (64.9)     | 0.026   | 61 (79.2)     | 91 (78.4)     | 1     |
| • Impaired ≥4.8%                             | 42 (20.9)      | 2 (5.4)        |        | 29 (17.8)      | 13 (35.1)     |         | 16 (20.8)     | 25 (21.6)     |       |
| <b>Liver volume</b>                          |                | (n=1 missing)  |        |                |               |         |               |               |       |
| • Normal <1935ml                             | 180 (89.6)     | 34 (97.1)      | 0.214  | 154 (94.5)     | 25 (67.6)     | <0.0001 | 68 (88.3)     | 104 (89.7)    | 0.816 |
| • Impaired ≥1935ml                           | 21 (10.4)      | 1 (2.9)        |        | 9 (5.5)        | 12 (32.4)     |         | 9 (11.7)      | 12 (10.3)     |       |
| <b>SPLEEN</b>                                |                |                |        |                |               |         |               |               |       |
| <b>Splenic volume (ml)</b>                   |                | (n=1 missing)  |        |                |               |         |               |               |       |
| • Normal <350ml                              | 194 (96.5)     | 32 (91.4)      | 0.172  | 160 (98.2)     | 33 (89.2)     | 0.023   | 74 (96.1)     | 112 (96.6)    | 1     |
| • Impaired ≥350ml                            | 7 (3.5)        | 3 (8.6)        |        | 3 (1.8)        | 4 (10.8)      |         | 3 (3.9)       | 4 (3.4)       |       |



1  
2  
3  
4  
5  
6  
7  
8  
9  
10  
11  
12  
13  
14  
15  
16  
17  
18  
19  
20  
21  
22  
23  
24  
25  
26  
27  
28  
29  
30  
31  
32  
33  
34  
35  
36  
37  
38  
39  
40  
41  
42  
43  
44  
45  
46

*\*Data are presented as count (%). Comparisons between managed at home vs hospitalised, and between moderate vs post-COVID syndrome were conducted using Fisher's exact test.*

For peer review only

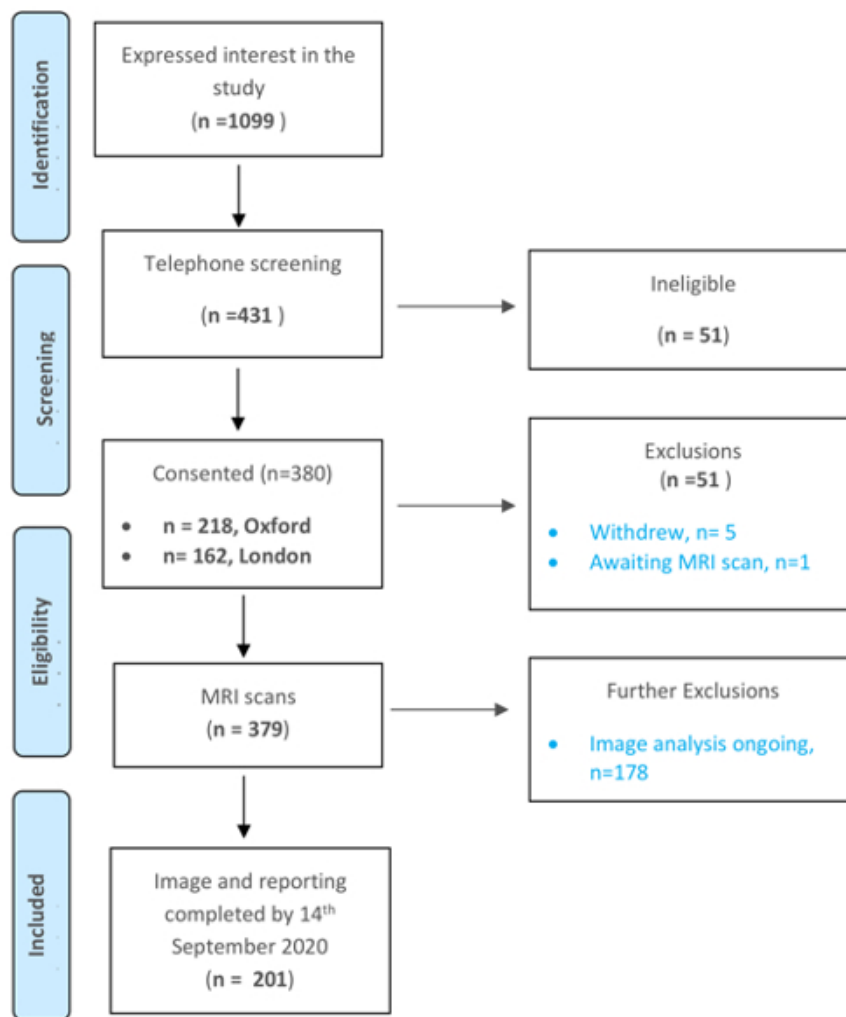

Figure 1. Flow from recruitment to enrolment of 201 patients with post COVID syndrome.

1  
2  
3  
4  
5  
6  
7  
8  
9  
10  
11  
12  
13  
14  
15  
16  
17  
18  
19  
20  
21  
22  
23  
24  
25  
26  
27  
28  
29  
30  
31  
32  
33  
34  
35  
36  
37  
38  
39  
40  
41  
42  
43  
44  
45  
46  
47  
48  
49  
50  
51  
52  
53  
54  
55  
56  
57  
58  
59  
60

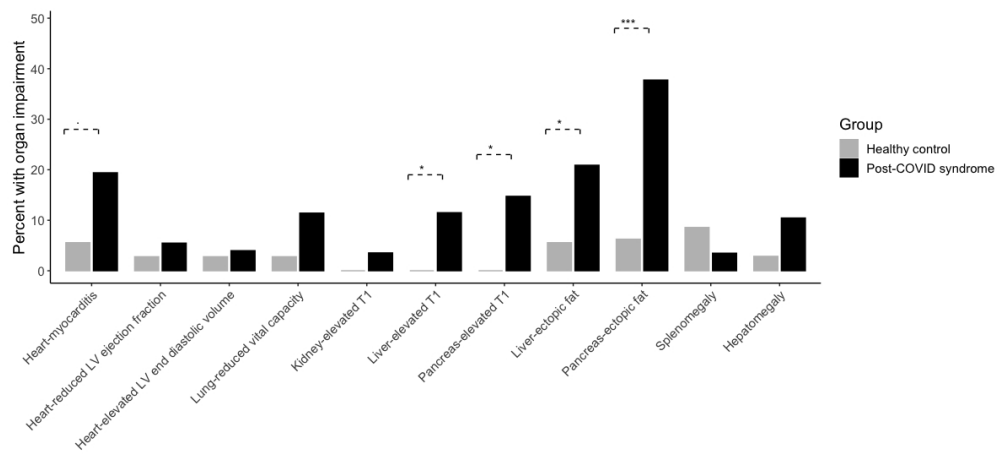

Figure 2. Organ impairment in low-risk individuals with post COVID syndrome (n=201) compared to healthy controls (n=36).

Significance: . p=0.05; \*p<0.05; \*\*p<0.01; \*\*\* p<.001.

418x206mm (72 x 72 DPI)

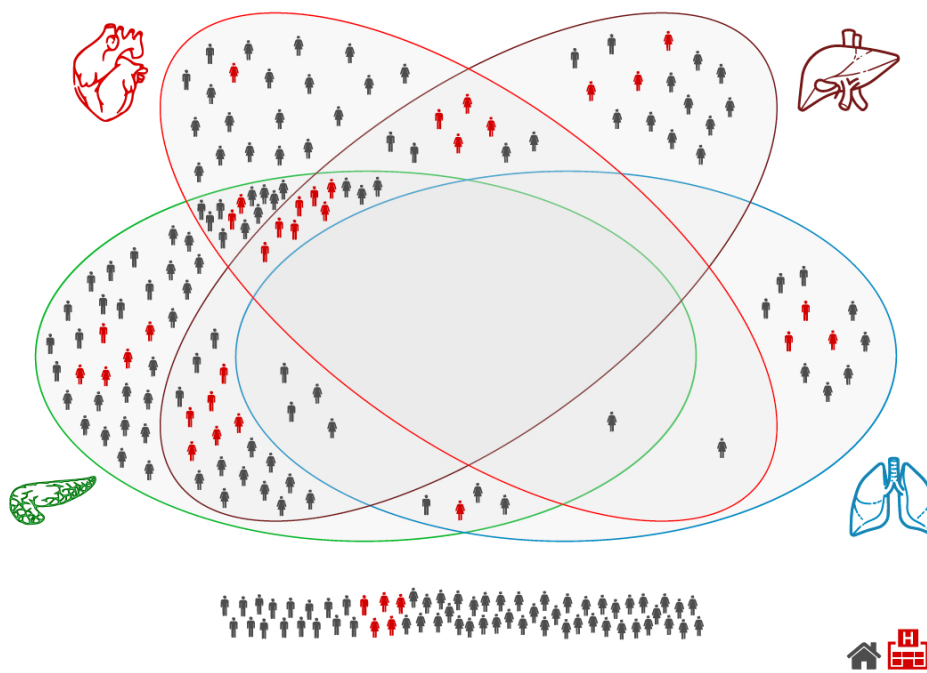

Figure 3. Multi-organ impairment in low-risk individuals with post COVID syndrome by gender and hospitalisation.

198x141mm (144 x 144 DPI)

1  
2  
3  
4  
5  
6  
7  
8  
9  
10  
11  
12  
13  
14  
15  
16  
17  
18  
19  
20  
21  
22  
23  
24  
25  
26  
27  
28  
29  
30  
31  
32  
33  
34  
35  
36  
37  
38  
39  
40  
41  
42  
43  
44  
45  
46  
47  
48  
49  
50  
51  
52  
53  
54  
55  
56  
57  
58  
59  
60

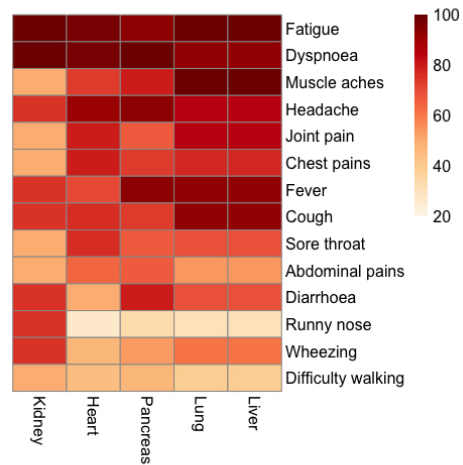

Figure 4: Reported symptoms and organ impairment in individuals with severe post COVID syndrome.

Darker red indicates higher percentage of reported symptoms per impaired organ.

349x206mm (72 x 72 DPI)

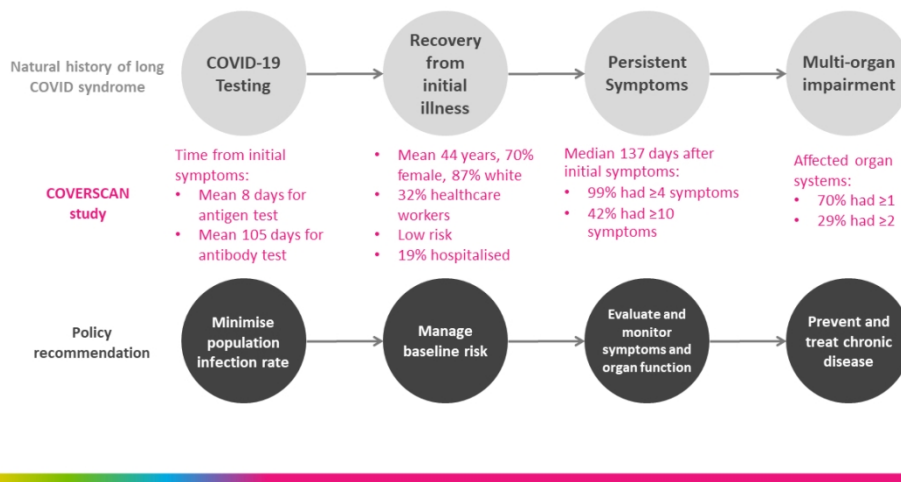

Figure 5: Natural history of post COVID syndrome, the COVERSCAN study in low-risk individuals (n=201) and policy recommendations.

338x190mm (96 x 96 DPI)

1  
2  
3  
4  
5  
6  
7  
8  
9  
10  
11  
12  
13  
14  
15  
16  
17  
18  
19  
20  
21  
22  
23  
24  
25  
26  
27  
28  
29  
30  
31  
32  
33  
34  
35  
36  
37  
38  
39  
40  
41  
42  
43  
44  
45  
46  
47  
48  
49  
50  
51  
52  
53  
54  
55  
56  
57  
58  
59  
60

### Web Supplementary Materials

|                                                                                                                                        |    |
|----------------------------------------------------------------------------------------------------------------------------------------|----|
| Supplementary methods                                                                                                                  | 2  |
| Supplementary references                                                                                                               | 4  |
| Supplementary results                                                                                                                  | 6  |
| Figure S1: Comparison of patients to control quantitative image derived measures in a subset of those scanned at 1.5T                  | 6  |
| Table S1: Reference ranges to define organ impairment                                                                                  | 7  |
| Figure S2: Organ impairment in severe versus moderate post COVID syndrome (n=201)                                                      | 7  |
| Table S2: Blood investigations in 201 low-risk individuals with post-COVID syndrome, sub-divided by hospitalisation or managed at home | 8  |
| Table S3: Blood investigations in 201 low-risk individuals, sub-divided by those with severe of moderate post-COVID syndrome           | 13 |

## Supplementary methods

### **Blood investigations**

Blood investigations included: full blood count, serum biochemistry (sodium, chloride, bicarbonate, urea, creatinine, bilirubin, alkaline phosphatase, aspartate transferase, alanine transferase, lactate dehydrogenase, creatinine kinase, gamma-glutamyl transpeptidase, total protein, albumin, globulin, calcium, magnesium, phosphate, uric acid, fasting triglycerides, cholesterol (total, HDL, LDL), iron, iron-binding capacity (unsaturated and total) and inflammatory markers (erythrocyte sedimentation rate, ESR; high sensitivity-C-Reactive Protein, CRP) (TDL laboratories, London).

### **Imaging**

All the imaging methods can be deployed on standard clinical MRI scanners and are generally expedited approaches of methods previously demonstrated in the scientific literature that unless stated each utilise a short (<14seconds) breath-hold.

Cardiac imaging involved complete coverage of the heart with a short-axis stack (to the valve plane) of cine images acquired using cardiac gating, this acquisition mirrors that in UK Biobank and is a standardized approach(S1). Three short-axis cardiac T1 maps are acquired using the MOLLI-T1 approach at the basal, mid and apical levels of the left ventricle.

Liver and pancreas imaging used the LiverMultiScan acquisition protocol (Perspectum, Oxford, UK), which involves 3 single 2D axial slice breath-held acquisitions that separately are sensitive to the fat content (proton density fat fraction, or PDFF), to T2\* (which is representative of liver iron content) and a MOLLI-T1 measurement (providing a measurement of tissue water), additionally a volumetric scan was used that covers the entire liver(S2).

Two dynamic cine MR acquisitions of the lung were acquired in the coronal plane with a 306.91 ms temporal resolution: one 40 s acquisition with the patient instructed to breathe normally and a second 30 s acquisition with the patient instructed to breathe deeply.

Kidney imaging used a single coronal view that was able to image both kidneys, imaging contrasts were MOLLI-T1, T2\* (for blood oxygen level assessment), and diffusion imaging that was acquired during free-breathing in 2minutes.

### **Image Analysis**

Cardiac MRI Analysis: Experienced cardiac MRI analysts used CVI42 (Cardiovascular Imaging Inc, Canada) to manually trace the end-diastolic and end-systolic phases in each of the short-axis views, following the standard UK BioBank evaluation approach as previously described(S3). This analysis yielded: For both the left and the right ventricle; End diastolic volume, End systolic volume, Stroke volume and Ejection Fraction. Additionally left ventricular muscle mass and wall thickness are determined from the function data. Cardiac T1 was determined for each of the 16 cardiac segments (of the AHA 17 segment model)(S4).

Liver Images were analysed by data analysts experienced at using the LiverMultiScan (Perspectum, Oxford, UK) software. This yielded global metrics in each liver of PDFF (proton density fat fraction), T2\*, and cT1 (cT1 is a measurement of T1 that has been corrected for the confounding effects of iron and standardised to 3 Tesla; it is elevated with disease).

Pancreas images were analysed in a similar manner to the above except the software used was not FDA-cleared and iron correction was not performed. The output T1 was standardized to 3 Tesla.



1  
2  
3 Lung cine imaging allowed the measurement of the area of the left and right lungs through the  
4 breathing cycle in the coronal plane, which used automated methods that were reviewed by image  
5 analysts. The periodicity of the area fluctuations was used to determine the respiratory rate. All analysis  
6 was performed in-house using MATLAB based tools. The method was validated by measuring the  
7 correlation between the change in area and the forced vital capacity, the latter being measured using  
8 spirometry.  
9

10  
11 Patient respiration was assessed by imaging a single 2D coronal slice of the lungs over 30 seconds  
12 using a dynamic cine MRI acquisition, during which the patient instructed to breathe deeply.  
13

14 Kidney images were assessed using in-house tools to fit the parametric maps and allow trained analysts  
15 to make measurements. The T2\* maps were analysed by the Twelve Layer Concentric Object (TLCO)  
16 approach that generates a gradient of relaxation values, in the other evaluations the cortex and medulla  
17 were manually segmented using the MOLLI-T1 map or the b=0 (in the case of diffusion) to guide the  
18 boundary.  
19

20  
21 In all cases the volumetric assessments utilised an initial in-house developed machine-learning driven  
22 segmentation, and then a manual step that may be used to fine tune boundaries. This approach was  
23 also used in the body composition analysis, which for reasons of speed was performed only in a single  
24 slice (an axial view that passes through L3 of the spine) in this work.  
25  
26  
27  
28  
29  
30  
31  
32  
33  
34  
35  
36  
37  
38  
39  
40  
41  
42  
43  
44  
45  
46  
47  
48  
49  
50  
51  
52  
53  
54  
55  
56  
57  
58  
59  
60

### Supplementary references

S1. Petersen SE, Matthews PM, Francis JM, Robson MD, Zemrak F, Boubertakh R, Young AA, Hudson S, Weale P, Garratt S, Collins R, Piechnik S, Neubauer S. UK Biobank's cardiovascular magnetic resonance protocol. *J Cardiovasc Magn Reson*. 2016 Feb 1;18:8.

S2. Banerjee R, Pavlides M, Tunnicliffe EM, Piechnik SK, Sarania N, Philips R, Collier JD, Booth JC, Schneider JE, Wang LM, Delaney DW, Fleming KA, Robson MD, Barnes E, Neubauer S. Multiparametric magnetic resonance for the non-invasive diagnosis of liver disease. *J Hepatol*. 2014 Jan;60(1):69-77. doi: 10.1016/j.jhep.2013.09.002.

S3. Petersen SE, Aung N, Sanghvi MM, Zemrak F, Fung K, Paiva JM, Francis JM, Khanji MY, Lukaschuk E, Lee AM, Carapella V, Kim YJ, Leeson P, Piechnik SK, Neubauer S. Reference ranges for cardiac structure and function using cardiovascular magnetic resonance (CMR) in Caucasians from the UK Biobank population cohort. *J Cardiovasc Magn Reson*. 2017 Feb 3;19(1):18.

S4. Cerqueira MD, Weissman NJ, Dilsizian V, Jacobs AK, Kaul S, Laskey WK, Pennell DJ, Rumberger JA, Ryan T, Verani MS; American Heart Association Writing Group on Myocardial Segmentation and Registration for Cardiac Imaging. Standardized myocardial segmentation and nomenclature for tomographic imaging of the heart. A statement for healthcare professionals from the Cardiac Imaging Committee of the Council on Clinical Cardiology of the American Heart Association. *Circulation*. 2002 Jan 29;105(4):539-42.

S5. Kawel-Boehm N, Maceira A, Valsangiacomo-Buechel ER, Vogel-Claussen J, Turkbey EB, Williams R, Plein S, Tee M, Eng J, Bluemke DA. Normal values for cardiovascular magnetic resonance in adults and children. *J Cardiovasc Magn Reson*. 2015 Apr 18;17(1):29.

S6. Ponikowski P, Voors AA, Anker SD, Bueno H, Cleland JGF, Coats AJS, Falk V, González-Juanatey JR, Harjola VP, Jankowska EA, Jessup M, Linde C, Nihoyannopoulos P, Parissis JT, Pieske B, Riley JP, Rosano GMC, Ruilope LM, Ruschitzka F, Rutten FH, van der Meer P; ESC Scientific Document Group. 2016 ESC Guidelines for the diagnosis and treatment of acute and chronic heart failure: The Task Force for the diagnosis and treatment of acute and chronic heart failure of the European Society of Cardiology (ESC) Developed with the special contribution of the Heart Failure Association (HFA) of the ESC. *Eur Heart J*. 2016 Jul 14;37(27):2129-2200.

S7. Tsao CW, Lyass A, Larson MG, Cheng S, Lam CS, Aragam JR, Benjamin EJ, Vasan RS. Prognosis of adults with borderline left ventricular ejection fraction. *JACC Heart Fail*. 2016 Jun;4(6):502-10.

S8. Chalasani, Naga, et al. The diagnosis and management of nonalcoholic fatty liver disease: practice guidance from the American Association for the Study of Liver Diseases. *Hepatology* 67.1 (2018): 328-357

S9. Mojtahed A, Kelly C, Herlihy A, et al. Reference range of liver corrected T1 values in a population at low risk for fatty liver disease—a UK Biobank sub-study, with an appendix of interesting cases. *Abdominal Radiol* 2019; 44: 72–84.

S10. Jayaswal AN, Levick C, Selvaraj EA, et al. Prognostic value of multiparametric MRI, transient elastography and blood-based fibrosis markers in patients with chronic liver disease. *Liver Int* 2020; in press. DOI:doi:10.1111/liv.14625.

S11. Jayaswal ANA, Levick C, Selvaraj EA, Dennis A, Booth JC, Collier J, Cobbold J, Tunnicliffe EM, Kelly M, Barnes E, Neubauer S, Banerjee R, Pavlides M. Prognostic value of multiparametric magnetic

1  
2  
3 resonance imaging, transient elastography and blood-based fibrosis markers in patients with chronic  
4 liver disease. *Liver Int.* 2020 Jul 30. doi: 10.1111/liv.14625  
5

6 S12. Chouhan MD, Firmin L, Read S, Amin Z, Taylor SA. Quantitative pancreatic MRI: a pathology-  
7 based review. *Br J Radiol.* 2019 Jul;92(1099):20180941.  
8

9 S13. Harrington KA, Shukla-Dave A, Paudyal R, Do RKG. MRI of the Pancreas. *J Magn Reson Imaging.*  
10 2020 Apr 17. doi: 10.1002/jmri.27148.  
11

12 S14. Gillis KA, McComb C, Patel RK, et al. Non-contrast renal magnetic resonance imaging to assess  
13 perfusion and corticomedullary differentiation in health and chronic kidney disease. *Nephron* 2016;  
14 133: 183–92.  
15

16 S15. Peperhove M, Vo Chieu VD, Jang M-S, et al. Assessment of acute kidney injury with T1 mapping  
17 MRI following solid organ transplantation. *Eur Radiol* 2018; 28: 44–50.  
18

19 S16. Chow KU, Luxembourg B, Seifried E, Bonig H. Spleen size is significantly influenced by body height  
20 and sex: establishment of normal values for spleen size at us with a cohort of 1200 healthy  
21 individuals. *Radiology* 2015; 279: 306–13.  
22  
23  
24  
25  
26  
27  
28  
29  
30  
31  
32  
33  
34  
35  
36  
37  
38  
39  
40  
41  
42  
43  
44  
45  
46  
47  
48  
49  
50  
51  
52  
53  
54  
55  
56  
57  
58  
59  
60

**Supplementary results**

**Sub-group analysis**

Data from healthy participants (n=36) scanned on the 1.5T Siemens MRI scanner were compared to the sub-group of patients (N=121) scanned on the same MRI machine. Median global cardiac T1 was elevated in the patient group (979 ms versus 962ms, P=0.001). Lung fractional area difference, a measure of relaxed vital capacity, was significantly lower in the patient group (41% versus 48%, P<.001). Kidney inflammation (1148 vs 1084 ms, p <0.001) was significantly elevated in the patients as were markers of organ fat (liver 2.6% versus 2.1%, p=0.008; pancreas: 4.3% versus 2.5%, p<0.001) (**Figure S1**).

**Figure S1:** Box plots showing median and interquartile ranges for the healthy control group and the patient group for those scanned at 1.5T. Comparisons between groups were performed using two-sided Kolmogorov-Smirnov (KS) tests. Significance stars are \* P<.05; \*\* P<.01, \*\*\*P<.001.

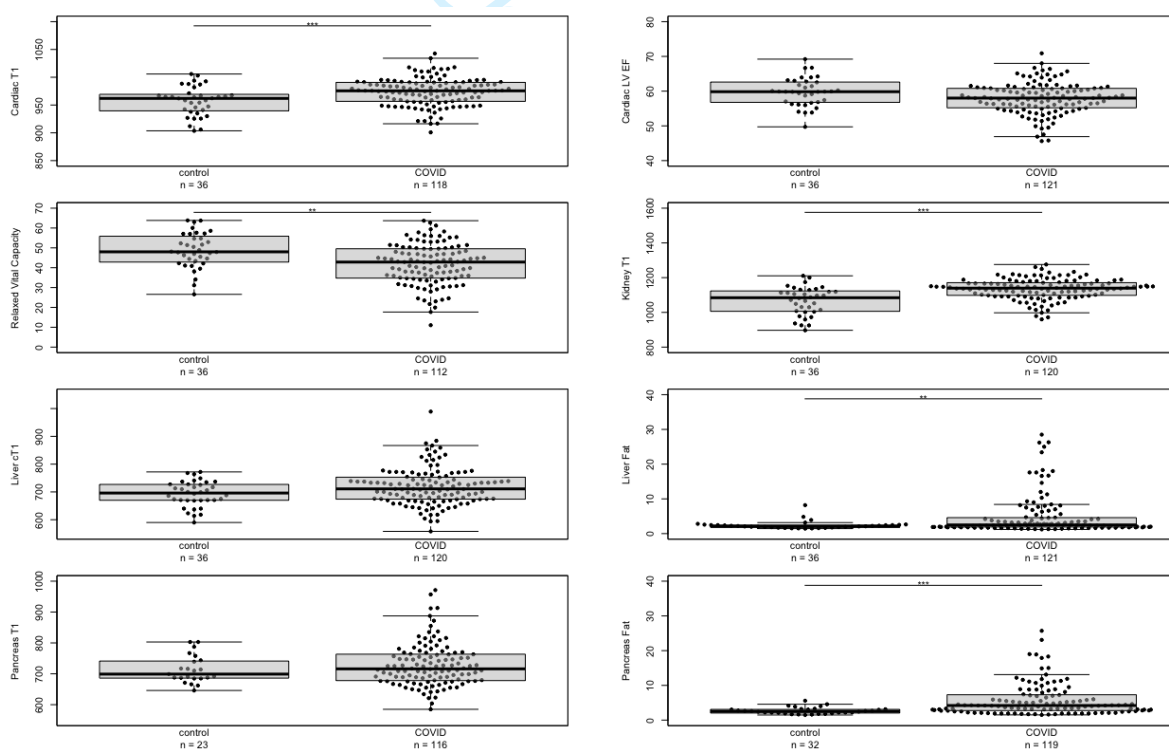

**Figure S2:** Organ impairment in severe versus moderate post COVID syndrome (n=201)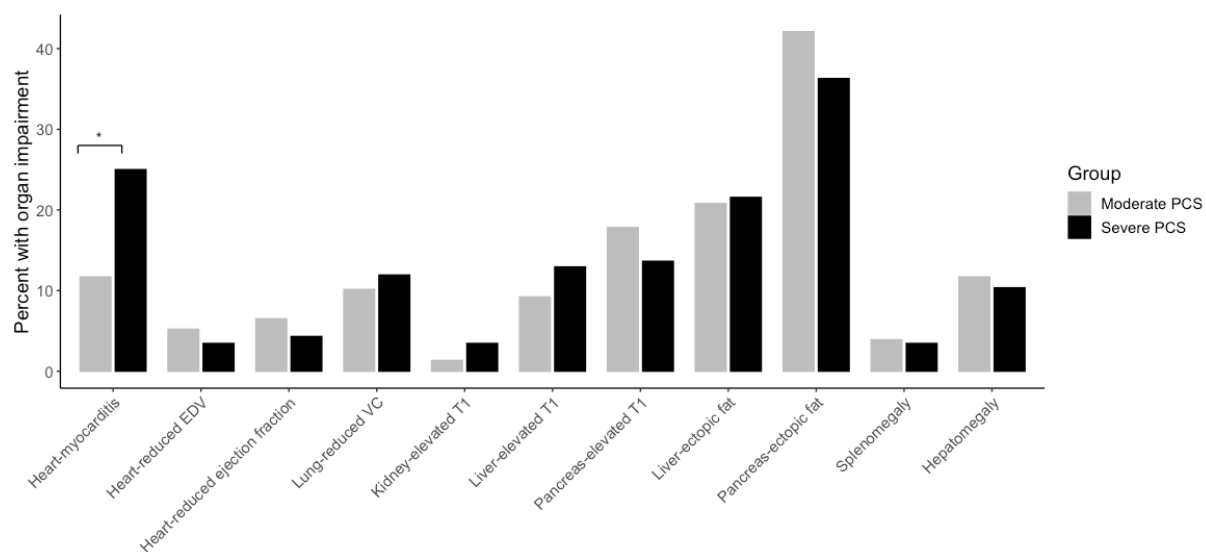**Table S1:** Reference ranges for organ impairment, defined as a value that was greater than the mean plus 2 standard deviations of that from the control group for most; mean minus 2 standard deviations for left ventricular ejection fraction and lung fractional area difference for the 1.5T scans. For the 3T scans, this was the value as reported by Raman et al (2020).

|                                                   | 1.5T Reference range               | 3T reference range |
|---------------------------------------------------|------------------------------------|--------------------|
| Left ventricular ejection fraction (LVEF) (S4-S7) | ≤ 51.5%                            | ----               |
| Increased end-diastolic volume (S4-S7)            | ≥ 264ml in men<br>≥ 206ml in women | ----               |
| Myocarditis (S4-S7)                               | ≥ 1015 ms                          | ≥ 1238ms           |
| Deep breathing fractional area change             | ≤ 31%                              | ----               |
| Liver volume (S8-S11)                             | ≤ 1.93L                            | ----               |
| Liver fat (S8-S11)                                | ≥ 4.8%                             | ----               |
| Liver inflammation (S8-S11)                       | ≥ 784 ms                           | ----               |
| Pancreatic fat (S12-S13)                          | ≥ 4.6%                             | ----               |
| Pancreatic inflammation (S12-13)                  | ≥ 803ms                            | ----               |
| Renal Cortical T1(S14-S15)                        | ≥ 1227ms                           | ≥ 1652ms           |
| Spleen volume(S16)                                | ≤ 0.35L                            | ----               |

**Table S2: Blood investigations in 201 low-risk individuals with post-COVID syndrome, sub-divided by those who were hospitalised versus those who were managed at home**

| Measurement                                                                                   | All         | Managed at home | Hospitalised | p-value |
|-----------------------------------------------------------------------------------------------|-------------|-----------------|--------------|---------|
| <b>Haemoglobin</b>                                                                            |             |                 |              |         |
| • Normal ( 130 - 170 g/L in men; 115 - 155 g/L in women )                                     | 170 (95.5%) | 140 (95.9%)     | 30 (93.8%)   | 0.575   |
| • Abnormal low ( < 130 g/L in men; < 115 g/L in women )                                       | 5 (2.8%)    | 4 (2.7%)        | 1 (3.1%)     |         |
| • Abnormal high ( > 170 g/L in men; > 155 g/L in women )                                      | 3 (1.7%)    | 2 (1.4%)        | 1 (3.1%)     |         |
| <b>Haematocrit (HCT)</b>                                                                      |             |                 |              |         |
| • Normal ( 0.37 - 0.5 in men; 0.33 - 0.45 in women )                                          | 173 (97.2%) | 142 (97.3%)     | 31 (96.9%)   | 0.386   |
| • Abnormal low ( < 0.37 in men; < 0.33 in women )                                             | 2 (1.1%)    | 1 (0.7%)        | 1 (3.1%)     |         |
| • Abnormal high ( > 0.5 in men; > 0.45 in women )                                             | 3 (1.7%)    | 3 (2.1%)        | 0 (0%)       |         |
| <b>Red cell count</b>                                                                         |             |                 |              |         |
| • Normal ( 4.4 - 5.8 x10 <sup>12</sup> /L in men; 3.95 - 5.15 x10 <sup>12</sup> /L in women ) | 170 (95.5%) | 140 (95.9%)     | 30 (93.8%)   | 0.287   |
| • Abnormal low ( < 4.4 x10 <sup>12</sup> /L in men; < 3.95 x10 <sup>12</sup> /L in women )    | 5 (2.8%)    | 3 (2.1%)        | 2 (6.2%)     |         |
| • Abnormal high ( > 5.8 x10 <sup>12</sup> /L in men; > 5.15 x10 <sup>12</sup> /L in women )   | 3 (1.7%)    | 3 (2.1%)        | 0 (0%)       |         |
| <b>Mean cell volume (MCV)</b>                                                                 |             |                 |              |         |
| • Normal ( 80 - 99 fL )                                                                       | 174 (97.8%) | 142 (97.3%)     | 32 (100%)    | 1       |
| • Abnormal low ( < 80 fL )                                                                    | 4 (2.2%)    | 4 (2.7%)        | 0 (0%)       |         |
| • Abnormal high ( > 99 fL )                                                                   | 0 (0%)      | 0 (0%)          | 0 (0%)       |         |
| <b>Mean corpuscular haemoglobin (MCH)</b>                                                     |             |                 |              |         |
| • Normal ( 26 - 33.5 pg )                                                                     | 174 (97.8%) | 143 (97.9%)     | 31 (96.9%)   | 0.249   |
| • Abnormal low ( < 26 pg )                                                                    | 3 (1.7%)    | 3 (2.1%)        | 0 (0%)       |         |
| • Abnormal high ( > 33.5 pg )                                                                 | 1 (0.6%)    | 0 (0%)          | 1 (3.1%)     |         |
| <b>Mean corpuscular haemoglobin concentration (MCHC)</b>                                      |             |                 |              |         |
| • Normal ( 300 - 350 g/L )                                                                    | 135 (75.8%) | 109 (74.7%)     | 26 (81.2%)   | 0.501   |
| • Abnormal low ( < 300 g/L )                                                                  | 0 (0%)      | 0 (0%)          | 0 (0%)       |         |
| • Abnormal high ( > 350 g/L )                                                                 | 43 (24.2%)  | 37 (25.3%)      | 6 (18.8%)    |         |
| <b>Red cell distribution width (RDW)</b>                                                      |             |                 |              |         |
| • Normal ( 11.5 - 15 )                                                                        | 161 (91%)   | 129 (89%)       | 32 (100%)    | 0.218   |
| • Abnormal low ( < 11.5 )                                                                     | 10 (5.6%)   | 10 (6.9%)       | 0 (0%)       |         |
| • Abnormal high ( > 15 )                                                                      | 6 (3.4%)    | 6 (4.1%)        | 0 (0%)       |         |
| <b>Platelet count</b>                                                                         |             |                 |              |         |
| • Normal ( 150 - 400 x10 <sup>9</sup> /L )                                                    | 166 (93.3%) | 138 (94.5%)     | 28 (87.5%)   | 0.152   |
| • Abnormal low ( < 150 x10 <sup>9</sup> /L )                                                  | 2 (1.1%)    | 2 (1.4%)        | 0 (0%)       |         |
| • Abnormal high ( > 400 x10 <sup>9</sup> /L )                                                 | 10 (5.6%)   | 6 (4.1%)        | 4 (12.5%)    |         |
| <b>Mean platelet volume (MPV)</b>                                                             |             |                 |              |         |
| • Normal ( 7 - 13 fL )                                                                        | 177 (99.4%) | 145 (99.3%)     | 32 (100%)    | 1       |
| • Abnormal low ( < 7 fL )                                                                     | 0 (0%)      | 0 (0%)          | 0 (0%)       |         |
| • Abnormal high ( > 13 fL )                                                                   | 1 (0.6%)    | 1 (0.7%)        | 0 (0%)       |         |
| <b>White cell count</b>                                                                       |             |                 |              |         |

|                                                |             |             |            |       |
|------------------------------------------------|-------------|-------------|------------|-------|
| • Normal ( 3 - 10 x10 <sup>9</sup> /L )        | 172 (96.6%) | 140 (95.9%) | 32 (100%)  | 0.593 |
| • Abnormal low ( < 3 x10 <sup>9</sup> /L )     | 0 (0%)      | 0 (0%)      | 0 (0%)     |       |
| • Abnormal high ( > 10 x10 <sup>9</sup> /L )   | 6 (3.4%)    | 6 (4.1%)    | 0 (0%)     |       |
| <b>Neutrophils</b>                             |             |             |            |       |
| • Normal ( 2 - 7.5 x10 <sup>9</sup> /L )       | 163 (91.6%) | 133 (91.1%) | 30 (93.8%) | 1     |
| • Abnormal low ( < 2 x10 <sup>9</sup> /L )     | 12 (6.7%)   | 10 (6.8%)   | 2 (6.2%)   |       |
| • Abnormal high ( > 7.5 x10 <sup>9</sup> /L )  | 3 (1.7%)    | 3 (2.1%)    | 0 (0%)     |       |
| <b>Lymphocytes</b>                             |             |             |            |       |
| • Normal ( 1.2 - 3.65 x10 <sup>9</sup> /L )    | 161 (90.4%) | 130 (89%)   | 31 (96.9%) | 0.316 |
| • Abnormal low ( < 1.2 x10 <sup>9</sup> /L )   | 17 (9.6%)   | 16 (11%)    | 1 (3.1%)   |       |
| • Abnormal high ( > 3.65 x10 <sup>9</sup> /L ) | 0 (0%)      | 0 (0%)      | 0 (0%)     |       |
| <b>Monocytes</b>                               |             |             |            |       |
| • Normal ( 0.2 - 1 x10 <sup>9</sup> /L )       | 176 (98.9%) | 144 (98.6%) | 32 (100%)  | 1     |
| • Abnormal low ( < 0.2 x10 <sup>9</sup> /L )   | 1 (0.6%)    | 1 (0.7%)    | 0 (0%)     |       |
| • Abnormal high ( > 1 x10 <sup>9</sup> /L )    | 1 (0.6%)    | 1 (0.7%)    | 0 (0%)     |       |
| <b>Eosinophils</b>                             |             |             |            |       |
| • Normal ( 0 - 0.4 x10 <sup>9</sup> /L )       | 172 (96.6%) | 141 (96.6%) | 31 (96.9%) | 1     |
| • Abnormal low ( < 0 x10 <sup>9</sup> /L )     | 0 (0%)      | 0 (0%)      | 0 (0%)     |       |
| • Abnormal high ( > 0.4 x10 <sup>9</sup> /L )  | 6 (3.4%)    | 5 (3.4%)    | 1 (3.1%)   |       |
| <b>Basophils</b>                               |             |             |            |       |
| • Normal ( 0 - 0.1 x10 <sup>9</sup> /L )       | 178 (100%)  | 146 (100%)  | 32 (100%)  | N/A   |
| • Abnormal low ( < 0 x10 <sup>9</sup> /L )     | 0 (0%)      | 0 (0%)      | 0 (0%)     |       |
| • Abnormal high ( > 0.1 x10 <sup>9</sup> /L )  | 0 (0%)      | 0 (0%)      | 0 (0%)     |       |
| <b>Erythrocyte sedimentation rate (ESR)</b>    |             |             |            |       |
| • Normal ( 1 - 20 mm/hr )                      | 164 (91.1%) | 136 (91.9%) | 28 (87.5%) | 0.491 |
| • Abnormal low ( < 1 mm/hr )                   | 0 (0%)      | 0 (0%)      | 0 (0%)     |       |
| • Abnormal high ( > 20 mm/hr )                 | 16 (8.9%)   | 12 (8.1%)   | 4 (12.5%)  |       |
| <b>Sodium</b>                                  |             |             |            |       |
| • Normal ( 135 - 145 mmol/L )                  | 173 (97.2%) | 141 (96.6%) | 32 (100%)  | 1     |
| • Abnormal low ( < 135 mmol/L )                | 4 (2.2%)    | 4 (2.7%)    | 0 (0%)     |       |
| • Abnormal high ( > 145 mmol/L )               | 1 (0.6%)    | 1 (0.7%)    | 0 (0%)     |       |
| <b>Potassium</b>                               |             |             |            |       |
| • Normal ( 3.5 - 5.1 mmol/L )                  | 108 (62.1%) | 87 (61.3%)  | 21 (65.6%) | 0.692 |
| • Abnormal low ( < 3.5 mmol/L )                | 0 (0%)      | 0 (0%)      | 0 (0%)     |       |
| • Abnormal high ( > 5.1 mmol/L )               | 66 (37.9%)  | 55 (38.7%)  | 11 (34.4%) |       |
| <b>Chloride</b>                                |             |             |            |       |
| • Normal ( 98 - 107 mmol/L )                   | 171 (96.1%) | 139 (95.2%) | 32 (100%)  | 1     |
| • Abnormal low ( < 98 mmol/L )                 | 4 (2.2%)    | 4 (2.7%)    | 0 (0%)     |       |
| • Abnormal high ( > 107 mmol/L )               | 3 (1.7%)    | 3 (2.1%)    | 0 (0%)     |       |
| <b>Bicarbonate</b>                             |             |             |            |       |
| • Normal ( 22 - 29 mmol/L )                    | 150 (84.3%) | 125 (85.6%) | 25 (78.1%) | 0.169 |
| • Abnormal low ( < 22 mmol/L )                 | 18 (10.1%)  | 15 (10.3%)  | 3 (9.4%)   |       |
| • Abnormal high ( > 29 mmol/L )                | 10 (5.6%)   | 6 (4.1%)    | 4 (12.5%)  |       |
| <b>Urea</b>                                    |             |             |            |       |

|                                                               |             |             |            |       |
|---------------------------------------------------------------|-------------|-------------|------------|-------|
| • Normal ( 1.7 - 8.3 mmol/L )                                 | 178 (100%)  | 146 (100%)  | 32 (100%)  | N/A   |
| • Abnormal low ( < 1.7 mmol/L )                               | 0 (0%)      | 0 (0%)      | 0 (0%)     |       |
| • Abnormal high ( > 8.3 mmol/L )                              | 0 (0%)      | 0 (0%)      | 0 (0%)     |       |
| <b>Creatinine</b>                                             |             |             |            |       |
| • Normal ( 66 - 112 umol/L in men; 49 - 92 umol/L in women )  | 161 (90.4%) | 134 (91.8%) | 27 (84.4%) | 0.219 |
| • Abnormal low ( < 66 umol/L in men; < 49 umol/L in women )   | 12 (6.7%)   | 9 (6.2%)    | 3 (9.4%)   |       |
| • Abnormal high ( > 112 umol/L in men; > 92 umol/L in women ) | 5 (2.8%)    | 3 (2.1%)    | 2 (6.2%)   |       |
| <b>Bilirubin</b>                                              |             |             |            |       |
| • Normal ( 0 - 20 umol/L )                                    | 175 (98.3%) | 144 (98.6%) | 31 (96.9%) | 0.45  |
| • Abnormal low ( < 0 umol/L )                                 | 0 (0%)      | 0 (0%)      | 0 (0%)     |       |
| • Abnormal high ( > 20 umol/L )                               | 3 (1.7%)    | 2 (1.4%)    | 1 (3.1%)   |       |
| <b>Alkaline phosphatase</b>                                   |             |             |            |       |
| • Normal ( 40 - 129 IU/L in men; 35 - 104 IU/L in women )     | 168 (94.4%) | 137 (93.8%) | 31 (96.9%) | 0.161 |
| • Abnormal low ( < 40 IU/L in men; < 35 IU/L in women )       | 8 (4.5%)    | 8 (5.5%)    | 0 (0%)     |       |
| • Abnormal high ( > 129 IU/L in men; > 104 IU/L in women )    | 2 (1.1%)    | 1 (0.7%)    | 1 (3.1%)   |       |
| <b>Aspartate transferase</b>                                  |             |             |            |       |
| • Normal ( 0 - 37 IU/L in men; 0 - 31 IU/L in women )         | 162 (93.1%) | 133 (93.7%) | 29 (90.6%) | 0.464 |
| • Abnormal low ( < 0 IU/L in men; < 0 IU/L in women )         | 0 (0%)      | 0 (0%)      | 0 (0%)     |       |
| • Abnormal high ( > 37 IU/L in men; > 31 IU/L in women )      | 12 (6.9%)   | 9 (6.3%)    | 3 (9.4%)   |       |
| <b>Alanine transferase</b>                                    |             |             |            |       |
| • Normal ( 10 - 50 IU/L in men; 10 - 35 IU/L in women )       | 151 (84.8%) | 125 (85.6%) | 26 (81.2%) | 0.603 |
| • Abnormal low ( < 10 IU/L in men; < 10 IU/L in women )       | 2 (1.1%)    | 2 (1.4%)    | 0 (0%)     |       |
| • Abnormal high ( > 50 IU/L in men; > 35 IU/L in women )      | 25 (14%)    | 19 (13%)    | 6 (18.8%)  |       |
| <b>Lactate dehydrogenase (LDH)</b>                            |             |             |            |       |
| • Normal ( 135 - 225 IU/L in men; 135 - 214 IU/L in women )   | 142 (80.7%) | 118 (81.9%) | 24 (75%)   | 0.236 |
| • Abnormal low ( < 135 IU/L in men; < 135 IU/L in women )     | 5 (2.8%)    | 5 (3.5%)    | 0 (0%)     |       |
| • Abnormal high ( > 225 IU/L in men; > 214 IU/L in women )    | 29 (16.5%)  | 21 (14.6%)  | 8 (25%)    |       |
| <b>Creatinine kinase (CK)</b>                                 |             |             |            |       |
| • Normal ( 38 - 204 IU/L in men; 26 - 140 IU/L in women )     | 163 (91.6%) | 132 (90.4%) | 31 (96.9%) | 0.642 |
| • Abnormal low ( < 38 IU/L in men; < 26 IU/L in women )       | 2 (1.1%)    | 2 (1.4%)    | 0 (0%)     |       |
| • Abnormal high ( > 204 IU/L in men; > 140 IU/L in women )    | 13 (7.3%)   | 12 (8.2%)   | 1 (3.1%)   |       |
| <b>Gamma glutamyl transferase</b>                             |             |             |            |       |
| • Normal ( 10 - 71 IU/L in men; 6 - 42 IU/L in women )        | 165 (92.7%) | 136 (93.2%) | 29 (90.6%) | 0.461 |
| • Abnormal low ( < 10 IU/L in men; < 6 IU/L in women )        | 4 (2.2%)    | 4 (2.7%)    | 0 (0%)     |       |
| • Abnormal high ( > 71 IU/L in men; > 42 IU/L in women )      | 9 (5.1%)    | 6 (4.1%)    | 3 (9.4%)   |       |
| <b>Total protein</b>                                          |             |             |            |       |
| • Normal ( 63 - 83 g/L )                                      | 173 (97.2%) | 143 (97.9%) | 30 (93.8%) | 0.22  |
| • Abnormal low ( < 63 g/L )                                   | 3 (1.7%)    | 2 (1.4%)    | 1 (3.1%)   |       |
| • Abnormal high ( > 83 g/L )                                  | 2 (1.1%)    | 1 (0.7%)    | 1 (3.1%)   |       |
| <b>Albumin</b>                                                |             |             |            |       |
| • Normal ( 34 - 50 g/L )                                      | 167 (93.8%) | 136 (93.2%) | 31 (96.9%) | 0.692 |
| • Abnormal low ( < 34 g/L )                                   | 0 (0%)      | 0 (0%)      | 0 (0%)     |       |
| • Abnormal high ( > 50 g/L )                                  | 11 (6.2%)   | 10 (6.8%)   | 1 (3.1%)   |       |
| <b>Globulin</b>                                               |             |             |            |       |



|                                                                  |             |             |            |       |
|------------------------------------------------------------------|-------------|-------------|------------|-------|
| • Normal ( 19 - 35 g/L )                                         | 173 (97.2%) | 142 (97.3%) | 31 (96.9%) | 0.386 |
| • Abnormal low ( < 19 g/L )                                      | 3 (1.7%)    | 3 (2.1%)    | 0 (0%)     |       |
| • Abnormal high ( > 35 g/L )                                     | 2 (1.1%)    | 1 (0.7%)    | 1 (3.1%)   |       |
| <b>Calcium</b>                                                   |             |             |            |       |
| • Normal ( 2.2 - 2.6 mmol/L )                                    | 172 (96.6%) | 141 (96.6%) | 31 (96.9%) | 0.43  |
| • Abnormal low ( < 2.2 mmol/L )                                  | 2 (1.1%)    | 1 (0.7%)    | 1 (3.1%)   |       |
| • Abnormal high ( > 2.6 mmol/L )                                 | 4 (2.2%)    | 4 (2.7%)    | 0 (0%)     |       |
| <b>Magnesium</b>                                                 |             |             |            |       |
| • Normal ( 0.6 - 1 mmol/L )                                      | 176 (98.9%) | 144 (98.6%) | 32 (100%)  | 1     |
| • Abnormal low ( < 0.6 mmol/L )                                  | 1 (0.6%)    | 1 (0.7%)    | 0 (0%)     |       |
| • Abnormal high ( > 1 mmol/L )                                   | 1 (0.6%)    | 1 (0.7%)    | 0 (0%)     |       |
| <b>Phosphate</b>                                                 |             |             |            |       |
| • Normal ( 0.87 - 1.45 mmol/L )                                  | 150 (84.3%) | 121 (82.9%) | 29 (90.6%) | 0.518 |
| • Abnormal low ( < 0.87 mmol/L )                                 | 23 (12.9%)  | 21 (14.4%)  | 2 (6.2%)   |       |
| • Abnormal high ( > 1.45 mmol/L )                                | 5 (2.8%)    | 4 (2.7%)    | 1 (3.1%)   |       |
| <b>Uric acid</b>                                                 |             |             |            |       |
| • Normal ( 266 - 474 umol/L in men; 175 - 363 umol/L in women )  | 148 (83.1%) | 124 (84.9%) | 24 (75%)   | 0.067 |
| • Abnormal low ( < 266 umol/L in men; < 175 umol/L in women )    | 19 (10.7%)  | 16 (11%)    | 3 (9.4%)   |       |
| • Abnormal high ( > 474 umol/L in men; > 363 umol/L in women )   | 11 (6.2%)   | 6 (4.1%)    | 5 (15.6%)  |       |
| <b>Triglycerides</b>                                             |             |             |            |       |
| • Normal ( < 2.3 mmol/L )                                        | 10 (100%)   | 8 (100%)    | 2 (100%)   | N/A   |
| • Abnormal high ( > 2.3 mmol/L )                                 | 0 (0%)      | 0 (0%)      | 0 (0%)     |       |
| <b>Fasting triglycerides</b>                                     |             |             |            |       |
| • Normal ( < 2.3 mmol/L )                                        | 149 (88.7%) | 128 (92.8%) | 21 (70%)   | 0.002 |
| • Abnormal high ( > 2.3 mmol/L )                                 | 19 (11.3%)  | 10 (7.2%)   | 9 (30%)    |       |
| <b>Cholesterol</b>                                               |             |             |            |       |
| • Normal ( < 5 mmol/L )                                          | 4 (40%)     | 3 (37.5%)   | 1 (50%)    | 1     |
| • Abnormal high ( > 5 mmol/L )                                   | 6 (60%)     | 5 (62.5%)   | 1 (50%)    |       |
| <b>Fasting cholesterol</b>                                       |             |             |            |       |
| • Normal ( < 5 mmol/L )                                          | 98 (58.3%)  | 86 (62.3%)  | 12 (40%)   | 0.04  |
| • Abnormal high ( > 5 mmol/L )                                   | 70 (41.7%)  | 52 (37.7%)  | 18 (60%)   |       |
| <b>HDL cholesterol</b>                                           |             |             |            |       |
| • Normal ( 0.9 - 1.5 mmol/L in men; 1.2 - 1.7 mmol/L in women )  | 106 (59.6%) | 87 (59.6%)  | 19 (59.4%) | 0.075 |
| • Abnormal low ( < 0.9 mmol/L in men; < 1.2 mmol/L in women )    | 16 (9%)     | 10 (6.8%)   | 6 (18.8%)  |       |
| • Abnormal high ( > 1.5 mmol/L in men; > 1.7 mmol/L in women )   | 56 (31.5%)  | 49 (33.6%)  | 7 (21.9%)  |       |
| <b>LDL cholesterol</b>                                           |             |             |            |       |
| • Normal ( < 3 mmol/L )                                          | 113 (64.9%) | 100 (69.4%) | 13 (43.3%) | 0.011 |
| • Abnormal high ( > 3 mmol/L )                                   | 61 (35.1%)  | 44 (30.6%)  | 17 (56.7%) |       |
| <b>Iron</b>                                                      |             |             |            |       |
| • Normal ( 10.6 - 28.3 umol/L in men; 6.6 - 26 umol/L in women ) | 164 (92.1%) | 135 (92.5%) | 29 (90.6%) | 0.22  |
| • Abnormal low ( < 10.6 umol/L in men; < 6.6 umol/L in women )   | 4 (2.2%)    | 2 (1.4%)    | 2 (6.2%)   |       |

|                                                                |             |             |            |       |
|----------------------------------------------------------------|-------------|-------------|------------|-------|
| • Abnormal high ( > 28.3 umol/L in men; > 26 umol/L in women ) | 10 (5.6%)   | 9 (6.2%)    | 1 (3.1%)   |       |
| <b>Total iron binding capacity (TIBC)</b>                      |             |             |            |       |
| • Normal ( 41 - 77 umol/L )                                    | 172 (97.2%) | 141 (97.2%) | 31 (96.9%) | 1     |
| • Abnormal low ( < 41 umol/L )                                 | 0 (0%)      | 0 (0%)      | 0 (0%)     |       |
| • Abnormal high ( > 77 umol/L )                                | 5 (2.8%)    | 4 (2.8%)    | 1 (3.1%)   |       |
| <b>Transferrin saturation</b>                                  |             |             |            |       |
| • Normal ( 20 - 55 % )                                         | 139 (78.5%) | 120 (82.8%) | 19 (59.4%) | 0.011 |
| • Abnormal low ( < 20 % )                                      | 34 (19.2%)  | 22 (15.2%)  | 12 (37.5%) |       |
| • Abnormal high ( > 55 % )                                     | 4 (2.3%)    | 3 (2.1%)    | 1 (3.1%)   |       |
| <b>High sensitivity CRP</b>                                    |             |             |            |       |
| • Normal ( 0 - 5 mg/L )                                        | 146 (92.4%) | 124 (93.9%) | 22 (84.6%) | 0.112 |
| • Abnormal low ( < 0 mg/L )                                    | 0 (0%)      | 0 (0%)      | 0 (0%)     |       |
| • Abnormal high ( > 5 mg/L )                                   | 12 (7.6%)   | 8 (6.1%)    | 4 (15.4%)  |       |

**Table S3: Blood investigations in 201 low-risk individuals sub-divided by those with severe or moderate post-COVID syndrome (PCS)**

| Measurement                                                                                   | All         | Moderate PCS | Severe PCS  | p-value |
|-----------------------------------------------------------------------------------------------|-------------|--------------|-------------|---------|
| <b>Haemoglobin</b>                                                                            |             |              |             |         |
| • Normal ( 130 - 170 g/L in men; 115 - 155 g/L in women )                                     | 166 (96%)   | 62 (96.9%)   | 104 (95.4%) | 1       |
| • Abnormal low ( < 130 g/L in men; < 115 g/L in women )                                       | 4 (2.3%)    | 1 (1.6%)     | 3 (2.8%)    |         |
| • Abnormal high ( > 170 g/L in men; > 155 g/L in women )                                      | 3 (1.7%)    | 1 (1.6%)     | 2 (1.8%)    |         |
| <b>Haematocrit (HCT)</b>                                                                      |             |              |             |         |
| • Normal ( 0.37 - 0.5 in men; 0.33 - 0.45 in women )                                          | 168 (97.1%) | 64 (100%)    | 104 (95.4%) | 0.274   |
| • Abnormal low ( < 0.37 in men; < 0.33 in women )                                             | 2 (1.2%)    | 0 (0%)       | 2 (1.8%)    |         |
| • Abnormal high ( > 0.5 in men; > 0.45 in women )                                             | 3 (1.7%)    | 0 (0%)       | 3 (2.8%)    |         |
| <b>Red cell count</b>                                                                         |             |              |             |         |
| • Normal ( 4.4 - 5.8 x10 <sup>12</sup> /L in men; 3.95 - 5.15 x10 <sup>12</sup> /L in women ) | 167 (96.5%) | 61 (95.3%)   | 106 (97.2%) | 0.825   |
| • Abnormal low ( < 4.4 x10 <sup>12</sup> /L in men; < 3.95 x10 <sup>12</sup> /L in women )    | 4 (2.3%)    | 2 (3.1%)     | 2 (1.8%)    |         |
| • Abnormal high ( > 5.8 x10 <sup>12</sup> /L in men; > 5.15 x10 <sup>12</sup> /L in women )   | 2 (1.2%)    | 1 (1.6%)     | 1 (0.9%)    |         |
| <b>Mean cell volume (MCV)</b>                                                                 |             |              |             |         |
| • Normal ( 80 - 99 fL )                                                                       | 170 (98.3%) | 62 (96.9%)   | 108 (99.1%) | 0.556   |
| • Abnormal low ( < 80 fL )                                                                    | 3 (1.7%)    | 2 (3.1%)     | 1 (0.9%)    |         |
| • Abnormal high ( > 99 fL )                                                                   | 0 (0%)      | 0 (0%)       | 0 (0%)      |         |
| <b>Mean corpuscular haemoglobin (MCH)</b>                                                     |             |              |             |         |
| • Normal ( 26 - 33.5 pg )                                                                     | 170 (98.3%) | 61 (95.3%)   | 109 (100%)  | 0.049   |
| • Abnormal low ( < 26 pg )                                                                    | 2 (1.2%)    | 2 (3.1%)     | 0 (0%)      |         |
| • Abnormal high ( > 33.5 pg )                                                                 | 1 (0.6%)    | 1 (1.6%)     | 0 (0%)      |         |
| <b>Mean corpuscular haemoglobin concentration (MCHC)</b>                                      |             |              |             |         |
| • Normal ( 300 - 350 g/L )                                                                    | 131 (75.7%) | 53 (82.8%)   | 78 (71.6%)  | 0.103   |
| • Abnormal low ( < 300 g/L )                                                                  | 0 (0%)      | 0 (0%)       | 0 (0%)      |         |
| • Abnormal high ( > 350 g/L )                                                                 | 42 (24.3%)  | 11 (17.2%)   | 31 (28.4%)  |         |
| <b>Red cell distribution width (RDW)</b>                                                      |             |              |             |         |
| • Normal ( 11.5 - 15 )                                                                        | 157 (91.3%) | 59 (92.2%)   | 98 (90.7%)  | 0.339   |
| • Abnormal low ( < 11.5 )                                                                     | 10 (5.8%)   | 2 (3.1%)     | 8 (7.4%)    |         |
| • Abnormal high ( > 15 )                                                                      | 5 (2.9%)    | 3 (4.7%)     | 2 (1.9%)    |         |
| <b>Platelet count</b>                                                                         |             |              |             |         |
| • Normal ( 150 - 400 x10 <sup>9</sup> /L )                                                    | 161 (93.1%) | 59 (92.2%)   | 102 (93.6%) | 0.417   |
| • Abnormal low ( < 150 x10 <sup>9</sup> /L )                                                  | 2 (1.2%)    | 0 (0%)       | 2 (1.8%)    |         |
| • Abnormal high ( > 400 x10 <sup>9</sup> /L )                                                 | 10 (5.8%)   | 5 (7.8%)     | 5 (4.6%)    |         |
| <b>Mean platelet volume (MPV)</b>                                                             |             |              |             |         |
| • Normal ( 7 - 13 fL )                                                                        | 172 (99.4%) | 64 (100%)    | 108 (99.1%) | 1       |
| • Abnormal low ( < 7 fL )                                                                     | 0 (0%)      | 0 (0%)       | 0 (0%)      |         |

|                                              |             |            |             |       |
|----------------------------------------------|-------------|------------|-------------|-------|
| • Abnormal high (> 13 fL)                    | 1 (0.6%)    | 0 (0%)     | 1 (0.9%)    |       |
| <b>White cell count</b>                      |             |            |             |       |
| • Normal (3 - 10 x10 <sup>9</sup> /L)        | 167 (96.5%) | 61 (95.3%) | 106 (97.2%) | 0.671 |
| • Abnormal low (< 3 x10 <sup>9</sup> /L)     | 0 (0%)      | 0 (0%)     | 0 (0%)      |       |
| • Abnormal high (> 10 x10 <sup>9</sup> /L)   | 6 (3.5%)    | 3 (4.7%)   | 3 (2.8%)    |       |
| <b>Neutrophils</b>                           |             |            |             |       |
| • Normal (2 - 7.5 x10 <sup>9</sup> /L)       | 159 (91.9%) | 57 (89.1%) | 102 (93.6%) | 0.468 |
| • Abnormal low (< 2 x10 <sup>9</sup> /L)     | 11 (6.4%)   | 5 (7.8%)   | 6 (5.5%)    |       |
| • Abnormal high (> 7.5 x10 <sup>9</sup> /L)  | 3 (1.7%)    | 2 (3.1%)   | 1 (0.9%)    |       |
| <b>Lymphocytes</b>                           |             |            |             |       |
| • Normal (1.2 - 3.65 x10 <sup>9</sup> /L)    | 156 (90.2%) | 56 (87.5%) | 100 (91.7%) | 0.43  |
| • Abnormal low (< 1.2 x10 <sup>9</sup> /L)   | 17 (9.8%)   | 8 (12.5%)  | 9 (8.3%)    |       |
| • Abnormal high (> 3.65 x10 <sup>9</sup> /L) | 0 (0%)      | 0 (0%)     | 0 (0%)      |       |
| <b>Monocytes</b>                             |             |            |             |       |
| • Normal (0.2 - 1 x10 <sup>9</sup> /L)       | 171 (98.8%) | 63 (98.4%) | 108 (99.1%) | 0.604 |
| • Abnormal low (< 0.2 x10 <sup>9</sup> /L)   | 1 (0.6%)    | 0 (0%)     | 1 (0.9%)    |       |
| • Abnormal high (> 1 x10 <sup>9</sup> /L)    | 1 (0.6%)    | 1 (1.6%)   | 0 (0%)      |       |
| <b>Eosinophils</b>                           |             |            |             |       |
| • Normal (0 - 0.4 x10 <sup>9</sup> /L)       | 167 (96.5%) | 63 (98.4%) | 104 (95.4%) | 0.415 |
| • Abnormal low (< 0 x10 <sup>9</sup> /L)     | 0 (0%)      | 0 (0%)     | 0 (0%)      |       |
| • Abnormal high (> 0.4 x10 <sup>9</sup> /L)  | 6 (3.5%)    | 1 (1.6%)   | 5 (4.6%)    |       |
| <b>Basophils</b>                             |             |            |             |       |
| • Normal (0 - 0.1 x10 <sup>9</sup> /L)       | 173 (100%)  | 64 (100%)  | 109 (100%)  | N/A   |
| • Abnormal low (< 0 x10 <sup>9</sup> /L)     | 0 (0%)      | 0 (0%)     | 0 (0%)      |       |
| • Abnormal high (> 0.1 x10 <sup>9</sup> /L)  | 0 (0%)      | 0 (0%)     | 0 (0%)      |       |
| <b>Erythrocyte sedimentation rate (ESR)</b>  |             |            |             |       |
| • Normal (1 - 20 mm/hr)                      | 160 (91.4%) | 62 (93.9%) | 98 (89.9%)  | 0.416 |
| • Abnormal low (< 1 mm/hr)                   | 0 (0%)      | 0 (0%)     | 0 (0%)      |       |
| • Abnormal high (> 20 mm/hr)                 | 15 (8.6%)   | 4 (6.1%)   | 11 (10.1%)  |       |
| <b>Sodium</b>                                |             |            |             |       |
| • Normal (135 - 145 mmol/L)                  | 168 (97.1%) | 63 (98.4%) | 105 (96.3%) | 1     |
| • Abnormal low (< 135 mmol/L)                | 4 (2.3%)    | 1 (1.6%)   | 3 (2.8%)    |       |
| • Abnormal high (> 145 mmol/L)               | 1 (0.6%)    | 0 (0%)     | 1 (0.9%)    |       |
| <b>Potassium</b>                             |             |            |             |       |
| • Normal (3.5 - 5.1 mmol/L)                  | 105 (62.1%) | 35 (56.5%) | 70 (65.4%)  | 0.255 |
| • Abnormal low (< 3.5 mmol/L)                | 0 (0%)      | 0 (0%)     | 0 (0%)      |       |
| • Abnormal high (> 5.1 mmol/L)               | 64 (37.9%)  | 27 (43.5%) | 37 (34.6%)  |       |
| <b>Chloride</b>                              |             |            |             |       |
| • Normal (98 - 107 mmol/L)                   | 166 (96%)   | 62 (96.9%) | 104 (95.4%) | 1     |
| • Abnormal low (< 98 mmol/L)                 | 4 (2.3%)    | 1 (1.6%)   | 3 (2.8%)    |       |
| • Abnormal high (> 107 mmol/L)               | 3 (1.7%)    | 1 (1.6%)   | 2 (1.8%)    |       |

|                                                               |             |            |             |       |
|---------------------------------------------------------------|-------------|------------|-------------|-------|
| <b>Bicarbonate</b>                                            |             |            |             |       |
| • Normal ( 22 - 29 mmol/L )                                   | 147 (85%)   | 55 (85.9%) | 92 (84.4%)  | 0.946 |
| • Abnormal low ( < 22 mmol/L )                                | 16 (9.2%)   | 6 (9.4%)   | 10 (9.2%)   |       |
| • Abnormal high ( > 29 mmol/L )                               | 10 (5.8%)   | 3 (4.7%)   | 7 (6.4%)    |       |
| <b>Urea</b>                                                   |             |            |             |       |
| • Normal ( 1.7 - 8.3 mmol/L )                                 | 173 (100%)  | 64 (100%)  | 109 (100%)  | N/A   |
| • Abnormal low ( < 1.7 mmol/L )                               | 0 (0%)      | 0 (0%)     | 0 (0%)      |       |
| • Abnormal high ( > 8.3 mmol/L )                              | 0 (0%)      | 0 (0%)     | 0 (0%)      |       |
| <b>Creatinine</b>                                             |             |            |             |       |
| • Normal ( 66 - 112 umol/L in men; 49 - 92 umol/L in women )  | 156 (90.2%) | 59 (92.2%) | 97 (89%)    | 0.705 |
| • Abnormal low ( < 66 umol/L in men; < 49 umol/L in women )   | 12 (6.9%)   | 3 (4.7%)   | 9 (8.3%)    |       |
| • Abnormal high ( > 112 umol/L in men; > 92 umol/L in women ) | 5 (2.9%)    | 2 (3.1%)   | 3 (2.8%)    |       |
| <b>Bilirubin</b>                                              |             |            |             |       |
| • Normal ( 0 - 20 umol/L )                                    | 170 (98.3%) | 63 (98.4%) | 107 (98.2%) | 1     |
| • Abnormal low ( < 0 umol/L )                                 | 0 (0%)      | 0 (0%)     | 0 (0%)      |       |
| • Abnormal high ( > 20 umol/L )                               | 3 (1.7%)    | 1 (1.6%)   | 2 (1.8%)    |       |
| <b>Alkaline phosphatase</b>                                   |             |            |             |       |
| • Normal ( 40 - 129 IU/L in men; 35 - 104 IU/L in women )     | 164 (94.8%) | 59 (92.2%) | 105 (96.3%) | 0.185 |
| • Abnormal low ( < 40 IU/L in men; < 35 IU/L in women )       | 7 (4%)      | 3 (4.7%)   | 4 (3.7%)    |       |
| • Abnormal high ( > 129 IU/L in men; > 104 IU/L in women )    | 2 (1.2%)    | 2 (3.1%)   | 0 (0%)      |       |
| <b>Aspartate transferase</b>                                  |             |            |             |       |
| • Normal ( 0 - 37 IU/L in men; 0 - 31 IU/L in women )         | 157 (92.9%) | 59 (93.7%) | 98 (92.5%)  | 1     |
| • Abnormal low ( < 0 IU/L in men; < 0 IU/L in women )         | 0 (0%)      | 0 (0%)     | 0 (0%)      |       |
| • Abnormal high ( > 37 IU/L in men; > 31 IU/L in women )      | 12 (7.1%)   | 4 (6.3%)   | 8 (7.5%)    |       |
| <b>Alanine transferase</b>                                    |             |            |             |       |
| • Normal ( 10 - 50 IU/L in men; 10 - 35 IU/L in women )       | 146 (84.4%) | 56 (87.5%) | 90 (82.6%)  | 0.512 |
| • Abnormal low ( < 10 IU/L in men; < 10 IU/L in women )       | 2 (1.2%)    | 1 (1.6%)   | 1 (0.9%)    |       |
| • Abnormal high ( > 50 IU/L in men; > 35 IU/L in women )      | 25 (14.5%)  | 7 (10.9%)  | 18 (16.5%)  |       |
| <b>Lactate dehydrogenase (LDH)</b>                            |             |            |             |       |
| • Normal ( 135 - 225 IU/L in men; 135 - 214 IU/L in women )   | 137 (80.1%) | 51 (81%)   | 86 (79.6%)  | 0.24  |
| • Abnormal low ( < 135 IU/L in men; < 135 IU/L in women )     | 5 (2.9%)    | 0 (0%)     | 5 (4.6%)    |       |
| • Abnormal high ( > 225 IU/L in men; > 214 IU/L in women )    | 29 (17%)    | 12 (19%)   | 17 (15.7%)  |       |
| <b>Creatinine kinase (CK)</b>                                 |             |            |             |       |
| • Normal ( 38 - 204 IU/L in men; 26 - 140 IU/L in women )     | 159 (91.9%) | 56 (87.5%) | 103 (94.5%) | 0.28  |
| • Abnormal low ( < 38 IU/L in men; < 26 IU/L in women )       | 2 (1.2%)    | 1 (1.6%)   | 1 (0.9%)    |       |
| • Abnormal high ( > 204 IU/L in men; > 140 IU/L in women )    | 12 (6.9%)   | 7 (10.9%)  | 5 (4.6%)    |       |
| <b>Gamma glutamyl transferase</b>                             |             |            |             |       |
| • Normal ( 10 - 71 IU/L in men; 6 - 42 IU/L in women )        | 161 (93.1%) | 60 (93.8%) | 101 (92.7%) | 0.426 |
| • Abnormal low ( < 10 IU/L in men; < 6 IU/L in women )        | 3 (1.7%)    | 0 (0%)     | 3 (2.8%)    |       |
| • Abnormal high ( > 71 IU/L in men; > 42 IU/L in women )      | 9 (5.2%)    | 4 (6.2%)   | 5 (4.6%)    |       |
| <b>Total protein</b>                                          |             |            |             |       |
| • Normal ( 63 - 83 g/L )                                      | 168 (97.1%) | 63 (98.4%) | 105 (96.3%) | 0.792 |

|                                                                 |             |            |             |       |
|-----------------------------------------------------------------|-------------|------------|-------------|-------|
| • Abnormal low ( < 63 g/L )                                     | 3 (1.7%)    | 1 (1.6%)   | 2 (1.8%)    |       |
| • Abnormal high ( > 83 g/L )                                    | 2 (1.2%)    | 0 (0%)     | 2 (1.8%)    |       |
| <b>Albumin</b>                                                  |             |            |             |       |
| • Normal ( 34 - 50 g/L )                                        | 162 (93.6%) | 59 (92.2%) | 103 (94.5%) | 0.538 |
| • Abnormal low ( < 34 g/L )                                     | 0 (0%)      | 0 (0%)     | 0 (0%)      |       |
| • Abnormal high ( > 50 g/L )                                    | 11 (6.4%)   | 5 (7.8%)   | 6 (5.5%)    |       |
| <b>Globulin</b>                                                 |             |            |             |       |
| • Normal ( 19 - 35 g/L )                                        | 168 (97.1%) | 61 (95.3%) | 107 (98.2%) | 0.616 |
| • Abnormal low ( < 19 g/L )                                     | 3 (1.7%)    | 2 (3.1%)   | 1 (0.9%)    |       |
| • Abnormal high ( > 35 g/L )                                    | 2 (1.2%)    | 1 (1.6%)   | 1 (0.9%)    |       |
| <b>Calcium</b>                                                  |             |            |             |       |
| • Normal ( 2.2 - 2.6 mmol/L )                                   | 167 (96.5%) | 62 (96.9%) | 105 (96.3%) | 0.525 |
| • Abnormal low ( < 2.2 mmol/L )                                 | 2 (1.2%)    | 0 (0%)     | 2 (1.8%)    |       |
| • Abnormal high ( > 2.6 mmol/L )                                | 4 (2.3%)    | 2 (3.1%)   | 2 (1.8%)    |       |
| <b>Magnesium</b>                                                |             |            |             |       |
| • Normal ( 0.6 - 1 mmol/L )                                     | 171 (98.8%) | 63 (98.4%) | 108 (99.1%) | 0.604 |
| • Abnormal low ( < 0.6 mmol/L )                                 | 1 (0.6%)    | 1 (1.6%)   | 0 (0%)      |       |
| • Abnormal high ( > 1 mmol/L )                                  | 1 (0.6%)    | 0 (0%)     | 1 (0.9%)    |       |
| <b>Phosphate</b>                                                |             |            |             |       |
| • Normal ( 0.87 - 1.45 mmol/L )                                 | 145 (83.8%) | 55 (85.9%) | 90 (82.6%)  | 0.824 |
| • Abnormal low ( < 0.87 mmol/L )                                | 23 (13.3%)  | 8 (12.5%)  | 15 (13.8%)  |       |
| • Abnormal high ( > 1.45 mmol/L )                               | 5 (2.9%)    | 1 (1.6%)   | 4 (3.7%)    |       |
| <b>Uric acid</b>                                                |             |            |             |       |
| • Normal ( 266 - 474 umol/L in men; 175 - 363 umol/L in women ) | 145 (83.8%) | 53 (82.8%) | 92 (84.4%)  | 0.804 |
| • Abnormal low ( < 266 umol/L in men; < 175 umol/L in women )   | 18 (10.4%)  | 8 (12.5%)  | 10 (9.2%)   |       |
| • Abnormal high ( > 474 umol/L in men; > 363 umol/L in women )  | 10 (5.8%)   | 3 (4.7%)   | 7 (6.4%)    |       |
| <b>Triglycerides</b>                                            |             |            |             |       |
| • Normal ( < 2.3 mmol/L )                                       | 10 (100%)   | 6 (100%)   | 4 (100%)    | N/A   |
| • Abnormal high ( > 2.3 mmol/L )                                | 0 (0%)      | 0 (0%)     | 0 (0%)      |       |
| <b>Fasting triglycerides</b>                                    |             |            |             |       |
| • Normal ( < 2.3 mmol/L )                                       | 144 (88.3%) | 52 (89.7%) | 92 (87.6%)  | 0.802 |
| • Abnormal high ( > 2.3 mmol/L )                                | 19 (11.7%)  | 6 (10.3%)  | 13 (12.4%)  |       |
| <b>Cholesterol</b>                                              |             |            |             |       |
| • Normal ( < 5 mmol/L )                                         | 4 (40%)     | 3 (50%)    | 1 (25%)     | 0.571 |
| • Abnormal high ( > 5 mmol/L )                                  | 6 (60%)     | 3 (50%)    | 3 (75%)     |       |
| <b>Fasting cholesterol</b>                                      |             |            |             |       |
| • Normal ( < 5 mmol/L )                                         | 96 (58.9%)  | 39 (67.2%) | 57 (54.3%)  | 0.135 |
| • Abnormal high ( > 5 mmol/L )                                  | 67 (41.1%)  | 19 (32.8%) | 48 (45.7%)  |       |
| <b>HDL cholesterol</b>                                          |             |            |             |       |
| • Normal ( 0.9 - 1.5 mmol/L in men; 1.2 - 1.7 mmol/L in women ) | 103 (59.5%) | 38 (59.4%) | 65 (59.6%)  | 0.539 |
| • Abnormal low ( < 0.9 mmol/L in men; < 1.2 mmol/L in women )   | 16 (9.2%)   | 4 (6.2%)   | 12 (11%)    |       |

|                                                                  |             |            |             |       |
|------------------------------------------------------------------|-------------|------------|-------------|-------|
| • Abnormal high ( > 1.5 mmol/L in men; > 1.7 mmol/L in women )   | 54 (31.2%)  | 22 (34.4%) | 32 (29.4%)  |       |
| <b>LDL cholesterol</b>                                           |             |            |             |       |
| • Normal (< 3 mmol/L )                                           | 111 (65.7%) | 45 (72.6%) | 66 (61.7%)  | 0.18  |
| • Abnormal high (> 3 mmol/L )                                    | 58 (34.3%)  | 17 (27.4%) | 41 (38.3%)  |       |
| <b>Iron</b>                                                      |             |            |             |       |
| • Normal ( 10.6 - 28.3 umol/L in men; 6.6 - 26 umol/L in women ) | 160 (92.5%) | 57 (89.1%) | 103 (94.5%) | 0.337 |
| • Abnormal low (< 10.6 umol/L in men; < 6.6 umol/L in women )    | 3 (1.7%)    | 2 (3.1%)   | 1 (0.9%)    |       |
| • Abnormal high (> 28.3 umol/L in men; > 26 umol/L in women )    | 10 (5.8%)   | 5 (7.8%)   | 5 (4.6%)    |       |
| <b>Total iron binding capacity (TIBC)</b>                        |             |            |             |       |
| • Normal ( 41 - 77 umol/L )                                      | 167 (97.1%) | 60 (93.8%) | 107 (99.1%) | 0.064 |
| • Abnormal low (< 41 umol/L )                                    | 0 (0%)      | 0 (0%)     | 0 (0%)      |       |
| • Abnormal high (> 77 umol/L )                                   | 5 (2.9%)    | 4 (6.2%)   | 1 (0.9%)    |       |
| <b>Transferrin saturation</b>                                    |             |            |             |       |
| • Normal ( 20 - 55 % )                                           | 135 (78.5%) | 50 (78.1%) | 85 (78.7%)  | 0.283 |
| • Abnormal low (< 20 % )                                         | 33 (19.2%)  | 11 (17.2%) | 22 (20.4%)  |       |
| • Abnormal high (> 55 % )                                        | 4 (2.3%)    | 3 (4.7%)   | 1 (0.9%)    |       |
| <b>High sensitivity CRP</b>                                      |             |            |             |       |
| • Normal ( 0 - 5 mg/L )                                          | 141 (92.2%) | 50 (96.2%) | 91 (90.1%)  | 0.223 |
| • Abnormal low (< 0 mg/L )                                       | 0 (0%)      | 0 (0%)     | 0 (0%)      |       |
| • Abnormal high (> 5 mg/L )                                      | 12 (7.8%)   | 2 (3.8%)   | 10 (9.9%)   |       |

Review only

## STROBE Statement—checklist of items that should be included in reports of observational studies

|                              | Item No | Recommendation                                                                                                                                                                                                                                                                                                                                                                                                                                                         | Pages                                 |
|------------------------------|---------|------------------------------------------------------------------------------------------------------------------------------------------------------------------------------------------------------------------------------------------------------------------------------------------------------------------------------------------------------------------------------------------------------------------------------------------------------------------------|---------------------------------------|
| <b>Title and abstract</b>    | 1       | (a) Indicate the study's design with a commonly used term in the title or the abstract                                                                                                                                                                                                                                                                                                                                                                                 | 3                                     |
|                              |         | (b) Provide in the abstract an informative and balanced summary of what was done and what was found                                                                                                                                                                                                                                                                                                                                                                    | 3                                     |
| <b>Introduction</b>          |         |                                                                                                                                                                                                                                                                                                                                                                                                                                                                        |                                       |
| Background/rationale         | 2       | Explain the scientific background and rationale for the investigation being reported                                                                                                                                                                                                                                                                                                                                                                                   | 4                                     |
| Objectives                   | 3       | State specific objectives, including any prespecified hypotheses                                                                                                                                                                                                                                                                                                                                                                                                       | 4                                     |
| <b>Methods</b>               |         |                                                                                                                                                                                                                                                                                                                                                                                                                                                                        |                                       |
| Study design                 | 4       | Present key elements of study design early in the paper                                                                                                                                                                                                                                                                                                                                                                                                                | 5                                     |
| Setting                      | 5       | Describe the setting, locations, and relevant dates, including periods of recruitment, exposure, follow-up, and data collection                                                                                                                                                                                                                                                                                                                                        | 5                                     |
| Participants                 | 6       | (a) <i>Cohort study</i> —Give the eligibility criteria, and the sources and methods of selection of participants. Describe methods of follow-up<br><i>Case-control study</i> —Give the eligibility criteria, and the sources and methods of case ascertainment and control selection. Give the rationale for the choice of cases and controls<br><i>Cross-sectional study</i> —Give the eligibility criteria, and the sources and methods of selection of participants | 5                                     |
|                              |         | (b) <i>Cohort study</i> —For matched studies, give matching criteria and number of exposed and unexposed<br><i>Case-control study</i> —For matched studies, give matching criteria and the number of controls per case                                                                                                                                                                                                                                                 | 3                                     |
| Variables                    | 7       | Clearly define all outcomes, exposures, predictors, potential confounders, and effect modifiers. Give diagnostic criteria, if applicable                                                                                                                                                                                                                                                                                                                               | 8                                     |
| Data sources/<br>measurement | 8*      | For each variable of interest, give sources of data and details of methods of assessment (measurement). Describe comparability of assessment methods if there is more than one group                                                                                                                                                                                                                                                                                   | 5-6 and<br>supplementary              |
| Bias                         | 9       | Describe any efforts to address potential sources of bias                                                                                                                                                                                                                                                                                                                                                                                                              | 10                                    |
| Study size                   | 10      | Explain how the study size was arrived at                                                                                                                                                                                                                                                                                                                                                                                                                              | Ongoing<br>study                      |
| Quantitative variables       | 11      | Explain how quantitative variables were handled in the analyses. If applicable, describe which groupings were chosen and why                                                                                                                                                                                                                                                                                                                                           | 6                                     |
| Statistical methods          | 12      | (a) Describe all statistical methods, including those used to control for confounding                                                                                                                                                                                                                                                                                                                                                                                  | 6                                     |
|                              |         | (b) Describe any methods used to examine subgroups and interactions                                                                                                                                                                                                                                                                                                                                                                                                    | 6                                     |
|                              |         | (c) Explain how missing data were addressed                                                                                                                                                                                                                                                                                                                                                                                                                            | 10                                    |
|                              |         | (d) <i>Cohort study</i> —If applicable, explain how loss to follow-up was addressed                                                                                                                                                                                                                                                                                                                                                                                    | n/a ongoing<br>observational<br>study |



1  
2  
3  
4  
5  
6  
7  
8  
9  
10  
11  
12  
13  
14  
15  
16  
17  
18  
19  
20  
21  
22  
23  
24  
25  
26  
27  
28  
29  
30  
31  
32  
33  
34  
35  
36  
37  
38  
39  
40  
41  
42  
43  
44  
45  
46  
47  
48  
49  
50  
51  
52  
53  
54  
55  
56  
57  
58  
59  
60

|                          |     |                                                                                                                                                                                                              |               |
|--------------------------|-----|--------------------------------------------------------------------------------------------------------------------------------------------------------------------------------------------------------------|---------------|
|                          |     | <i>Case-control study</i> —If applicable, explain how matching of cases and controls was addressed                                                                                                           |               |
|                          |     | <i>Cross-sectional study</i> —If applicable, describe analytical methods taking account of sampling strategy                                                                                                 |               |
|                          |     | (e) Describe any sensitivity analyses                                                                                                                                                                        | n/a           |
| <b>Results</b>           |     |                                                                                                                                                                                                              |               |
| Participants             | 13* | (a) Report numbers of individuals at each stage of study—eg numbers potentially eligible, examined for eligibility, confirmed eligible, included in the study, completing follow-up, and analysed            | 7<br>Figure 1 |
|                          |     | (b) Give reasons for non-participation at each stage                                                                                                                                                         | Figure 1      |
|                          |     | (c) Consider use of a flow diagram                                                                                                                                                                           | Figure 1      |
| Descriptive data         | 14* | (a) Give characteristics of study participants (eg demographic, clinical, social) and information on exposures and potential confounders                                                                     | Table 1       |
|                          |     | (b) Indicate number of participants with missing data for each variable of interest                                                                                                                          | Table 1       |
|                          |     | (c) <i>Cohort study</i> —Summarise follow-up time (eg, average and total amount)                                                                                                                             | Table 1       |
| Outcome data             | 15* | <i>Cohort study</i> —Report numbers of outcome events or summary measures over time                                                                                                                          | Table 1       |
|                          |     | <i>Case-control study</i> —Report numbers in each exposure category, or summary measures of exposure                                                                                                         | Table 1       |
|                          |     | <i>Cross-sectional study</i> —Report numbers of outcome events or summary measures                                                                                                                           | n/a           |
| Main results             | 16  | (a) Give unadjusted estimates and, if applicable, confounder-adjusted estimates and their precision (eg, 95% confidence interval). Make clear which confounders were adjusted for and why they were included | 8             |
|                          |     | (b) Report category boundaries when continuous variables were categorized                                                                                                                                    | Table 2       |
|                          |     | (c) If relevant, consider translating estimates of relative risk into absolute risk for a meaningful time period                                                                                             | n/a           |
| Other analyses           | 17  | Report other analyses done—eg analyses of subgroups and interactions, and sensitivity analyses                                                                                                               | n/a           |
| <b>Discussion</b>        |     |                                                                                                                                                                                                              |               |
| Key results              | 18  | Summarise key results with reference to study objectives                                                                                                                                                     | 9             |
| Limitations              | 19  | Discuss limitations of the study, taking into account sources of potential bias or imprecision. Discuss both direction and magnitude of any potential bias                                                   | 10            |
| Interpretation           | 20  | Give a cautious overall interpretation of results considering objectives, limitations, multiplicity of analyses, results from similar studies, and other relevant evidence                                   | 10            |
| Generalisability         | 21  | Discuss the generalisability (external validity) of the study results                                                                                                                                        | 10            |
| <b>Other information</b> |     |                                                                                                                                                                                                              |               |
| Funding                  | 22  | Give the source of funding and the role of the funders for the present study and, if applicable, for the original study on which the present article is based                                                | 12            |

1  
2 \*Give information separately for cases and controls in case-control studies and, if applicable, for exposed and  
3 unexposed groups in cohort and cross-sectional studies.  
4

5  
6 **Note:** An Explanation and Elaboration article discusses each checklist item and gives methodological background and  
7 published examples of transparent reporting. The STROBE checklist is best used in conjunction with this article (freely  
8 available on the Web sites of PLoS Medicine at <http://www.plosmedicine.org/>, Annals of Internal Medicine at  
9 <http://www.annals.org/>, and Epidemiology at <http://www.epidem.com/>). Information on the STROBE Initiative is  
10 available at [www.strobe-statement.org](http://www.strobe-statement.org).  
11  
12  
13  
14  
15  
16  
17  
18  
19  
20  
21  
22  
23  
24  
25  
26  
27  
28  
29  
30  
31  
32  
33  
34  
35  
36  
37  
38  
39  
40  
41  
42  
43  
44  
45  
46  
47  
48  
49  
50  
51  
52  
53  
54  
55  
56  
57  
58  
59  
60

For peer review only

# BMJ Open

## Prospective, community-based study of multi-organ impairment in low-risk individuals with post-COVID syndrome

|                                 |                                                                                                                                                                                                                                                                                                                                                                                                                                                                                                                                                                                                                                                                                                                                                                                                                                                                                                                                                                                                                                                                                                                               |
|---------------------------------|-------------------------------------------------------------------------------------------------------------------------------------------------------------------------------------------------------------------------------------------------------------------------------------------------------------------------------------------------------------------------------------------------------------------------------------------------------------------------------------------------------------------------------------------------------------------------------------------------------------------------------------------------------------------------------------------------------------------------------------------------------------------------------------------------------------------------------------------------------------------------------------------------------------------------------------------------------------------------------------------------------------------------------------------------------------------------------------------------------------------------------|
| Journal:                        | <i>BMJ Open</i>                                                                                                                                                                                                                                                                                                                                                                                                                                                                                                                                                                                                                                                                                                                                                                                                                                                                                                                                                                                                                                                                                                               |
| Manuscript ID                   | bmjopen-2020-048391.R1                                                                                                                                                                                                                                                                                                                                                                                                                                                                                                                                                                                                                                                                                                                                                                                                                                                                                                                                                                                                                                                                                                        |
| Article Type:                   | Original research                                                                                                                                                                                                                                                                                                                                                                                                                                                                                                                                                                                                                                                                                                                                                                                                                                                                                                                                                                                                                                                                                                             |
| Date Submitted by the Author:   | 25-Feb-2021                                                                                                                                                                                                                                                                                                                                                                                                                                                                                                                                                                                                                                                                                                                                                                                                                                                                                                                                                                                                                                                                                                                   |
| Complete List of Authors:       | Dennis, Andrea; Perspectum Diagnostics Ltd, Innovation Wamil, Malgorzata ; Great Western Hospital Foundation NHS Trust, Department of Cardiology<br>Alberts, Johann; Alliance Medical Limited<br>Oben, Jude; Guy's and St Thomas' NHS Foundation Trust, Department of Gastroenterology<br>Cuthbertson, Daniel; University of Liverpool, Institute of Cardiovascular and Metabolic Medicine<br>Wootton, Dan; University of Liverpool Institute of Infection and Global Health; Liverpool University Hospitals NHS Foundation Trust, Department of Respiratory Research<br>Crooks, Michael; Hull and East Yorkshire Hospitals NHS Trust, Department of Respiratory Medicine<br>Gabbay, Mark; University of Liverpool, 12Institute of Population Health Sciences<br>Brady, Michael; Perspectum Diagnostics Ltd<br>Hishmeh, Lyth; Long COVID SOS<br>Attree, Emily; UKDoctors#Longcovid<br>Heightman, Melissa; University College London Hospitals NHS Foundation Trust, Department of Medicine<br>Banerjee, Rajarshi; Perspectum Diagnostics Ltd<br>Banerjee, Amitava; University College London, Institute of Health Informatics |
| <b>Primary Subject Heading</b>: | Health services research                                                                                                                                                                                                                                                                                                                                                                                                                                                                                                                                                                                                                                                                                                                                                                                                                                                                                                                                                                                                                                                                                                      |
| Secondary Subject Heading:      | Diagnostics, Epidemiology, Infectious diseases, Patient-centred medicine                                                                                                                                                                                                                                                                                                                                                                                                                                                                                                                                                                                                                                                                                                                                                                                                                                                                                                                                                                                                                                                      |
| Keywords:                       | COVID-19, EPIDEMIOLOGY, Health policy < HEALTH SERVICES ADMINISTRATION & MANAGEMENT, Public health < INFECTIOUS DISEASES, PUBLIC HEALTH                                                                                                                                                                                                                                                                                                                                                                                                                                                                                                                                                                                                                                                                                                                                                                                                                                                                                                                                                                                       |
|                                 |                                                                                                                                                                                                                                                                                                                                                                                                                                                                                                                                                                                                                                                                                                                                                                                                                                                                                                                                                                                                                                                                                                                               |

SCHOLARONE™  
Manuscripts

1  
2  
3  
4  
5  
6  
7  
8  
9  
10  
11  
12  
13  
14  
15  
16  
17  
18  
19  
20  
21  
22  
23  
24  
25  
26  
27  
28  
29  
30  
31  
32  
33  
34  
35  
36  
37  
38  
39  
40  
41  
42  
43  
44  
45  
46  
47  
48  
49  
50  
51  
52  
53  
54  
55  
56  
57  
58  
59  
60

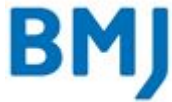

I, the Submitting Author has the right to grant and does grant on behalf of all authors of the Work (as defined in the below author licence), an exclusive licence and/or a non-exclusive licence for contributions from authors who are: i) UK Crown employees; ii) where BMJ has agreed a CC-BY licence shall apply, and/or iii) in accordance with the terms applicable for US Federal Government officers or employees acting as part of their official duties; on a worldwide, perpetual, irrevocable, royalty-free basis to BMJ Publishing Group Ltd ("BMJ") its licensees and where the relevant Journal is co-owned by BMJ to the co-owners of the Journal, to publish the Work in this journal and any other BMJ products and to exploit all rights, as set out in our [licence](#).

The Submitting Author accepts and understands that any supply made under these terms is made by BMJ to the Submitting Author unless you are acting as an employee on behalf of your employer or a postgraduate student of an affiliated institution which is paying any applicable article publishing charge ("APC") for Open Access articles. Where the Submitting Author wishes to make the Work available on an Open Access basis (and intends to pay the relevant APC), the terms of reuse of such Open Access shall be governed by a Creative Commons licence – details of these licences and which [Creative Commons](#) licence will apply to this Work are set out in our licence referred to above.

Other than as permitted in any relevant BMJ Author's Self Archiving Policies, I confirm this Work has not been accepted for publication elsewhere, is not being considered for publication elsewhere and does not duplicate material already published. I confirm all authors consent to publication of this Work and authorise the granting of this licence.

1  
2  
3  
4 **Prospective, community-based study of multi-organ impairment in low-risk individuals with**  
5 **post-COVID syndrome**

6 Dennis A, Wamil M, Alberts J, Oben J, Cuthbertson D, Wootton D, Crooks M, Gabbay M,  
7 Brady M, Hishmeh L, Attree E, Heightman M, Banerjee R\*, Banerjee A\*

8  
9  
10 Andrea Dennis PhD<sup>1</sup>, *Head of Biomarker Science, Perspectum*

11 andrea.dennis@perspectum.com

12 Malgorzata Wamil PhD<sup>2,3</sup> *Consultant Cardiologist* gosia.wamil@googlemail.com

13 Johann Alberts MBBCh<sup>4</sup>, *Medical Director* jalberts@alliance.co.uk

14  
15 Jude Oben PhD<sup>5,6</sup>, *Consultant Gastroenterologist/Hepatologist and Reader in Experimental*  
16 *Hepatology* jude.1.oben@kcl.ac.uk

17 Daniel Cuthbertson PhD<sup>7,8</sup>, *Professor of Diabetes and Consultant Physician*

18 dan.cuthbertson@liverpool.ac.uk

19 Dan Wootton PhD<sup>8,9</sup>, *Senior Fellow and Consultant Respiratory Physician*

20 D.G.Wootton@liverpool.ac.uk

21 Michael Crooks PhD<sup>10,11</sup>, *Senior Clinical Lecturer in Respiratory Medicine and Consultant*  
22 *Respiratory Physician* michael.crooks@hey.nhs.uk

23 Mark Gabbay PhD<sup>12</sup>, *Professor of General Practice and General Practitioner*

24 M.B.Gabbay@liverpool.ac.uk

25 Michael Brady PhD<sup>1,13</sup>, *Professor of Oncological Imaging and Chair, Perspectum*

26 Michael.Brady@perspectum.com

27 Lyth Hishmeh BSc<sup>14</sup>, *Member, Long COVID SOS* lythb7@hotmail.com

28 Emily Attree MBBS<sup>15</sup>, *salaried general practitioner and Founder, UKDoctors#Longcovid*  
29 emily.attree@nhs.net

30 Melissa Heightman PhD<sup>16</sup>, *Consultant Respiratory Physician* melissa.heightman1@nhs.net

31 Rajarshi Banerjee DPhil\*<sup>1,3</sup>, *Honorary Consultant Physician and Chief Executive,*  
32 *Perspectum* rajarshi.banerjee@perspectum.com

33 Amitava Banerjee DPhil\*<sup>16,17,18</sup>, *Associate Professor of Clinical Data Science and Honorary*  
34 *Consultant Cardiologist* ami.banerjee@ucl.ac.uk

35 On behalf of the COVERSCAN study investigators (listed at the end of manuscript)

36 <sup>1</sup>*Perspectum, 5520 John Smith Drive, Oxford, OX4 2LL, UK*

37 <sup>2</sup>*Great Western Hospitals NHS Foundation Trust*

38 <sup>3</sup>*Oxford University Hospitals NHS Foundation Trust*

39 <sup>4</sup>*Alliance Medical Limited, Icen Centre, Warwick Technology Park, Warwick, CV34 6DA*

<sup>5</sup> *Guy's and St Thomas' NHS Foundation Trust, London*

<sup>6</sup> *Institute for Liver and Digestive Health, University College London*

<sup>7</sup> *Institute of Cardiovascular and Metabolic Medicine, University of Liverpool*

<sup>8</sup> *Liverpool University Hospitals NHS Foundation Trust, Liverpool*

<sup>9</sup> *Institute of Infection & Global Health, University of Liverpool*

<sup>10</sup> *Institute of Clinical and Applied Health Research, University of Hull*

<sup>11</sup> *Hull and East Yorkshire Hospitals NHS Trust, Hull.*

<sup>12</sup> *Institute of Population Health Sciences, University of Liverpool*

<sup>13</sup> *Department of Oncology, University of Oxford, Oxford.*

<sup>14</sup> *Long COVID SOS, Oxford, UK*

<sup>15</sup> *UKDoctors#Longcovid, London, UK*

<sup>16</sup> *University College London Hospitals NHS Trust, 235 Euston Road, London, UK*

<sup>17</sup> *Institute of Health Informatics, University College London, 222 Euston Road, London, UK*

<sup>18</sup> *Barts Health NHS Trust, The Royal London Hospital, Whitechapel Rd, London, UK*

\*joint senior author

□ **Corresponding authors:** [ami.banerjee@ucl.ac.uk](mailto:ami.banerjee@ucl.ac.uk); [rajarshi.banerjee@perspectum.com](mailto:rajarshi.banerjee@perspectum.com)

## **Abstract**

**Objective:** To assess medium-term organ impairment in symptomatic individuals following recovery from acute SARS-CoV2 infection.

**Design:** Baseline findings from a prospective, observational cohort study.

**Setting:** Community-based individuals from two UK centres between 1 April and 14 September 2020.

**Participants:** Individuals  $\geq 18$  years with persistent symptoms following recovery from acute SARS-CoV-2 infection; and age-matched healthy controls.

**Intervention:** Assessment of symptoms by standardised questionnaires (EQ-5D-5L, Dyspnoea-12) and organ-specific metrics by biochemical assessment and quantitative magnetic resonance imaging (MRI).

1  
2  
3  
4 **Main outcome measures:** Severe post-COVID syndrome defined as ongoing respiratory  
5  
6 symptoms and/or moderate functional impairment in activities of daily living. Single and multi-  
7  
8 organ impairment (heart, lungs, kidneys, liver, pancreas, spleen) by consensus definitions at  
9  
10 baseline investigation.  
11

12  
13 **Results:** 201 individuals (mean age 45, range 21-71) years, 71% female, 88% white, 32%  
14  
15 healthcare workers) completed baseline assessment (median 141 days following SARS-CoV-  
16  
17 2 infection, IQR 110-162). The study population was low-risk for COVID-19 mortality (obesity:  
18  
19 20%, hypertension: 7%; type 2 diabetes: 2%; heart disease: 5%), with only 19% hospitalised  
20  
21 with COVID-19. 42% of individuals had ten or more symptoms, and 60% had severe post-  
22  
23 COVID syndrome. Fatigue (98%), muscle aches (87%), breathlessness (88%) and headaches  
24  
25 (83%) were most frequently reported. Mild organ impairment was present in heart (26%), lungs  
26  
27 (11%), kidneys (4%), liver (28%), pancreas (40%), and spleen (4%), with single and multi-  
28  
29 organ impairment in 70% and 29% respectively. Hospitalisation was associated with older age  
30  
31 (p=0.001), non-white ethnicity (p=0.016), increased liver volume (p<0.0001), pancreatic  
32  
33 inflammation (p<0.01), and fat accumulation in the liver (p<0.05) and pancreas (p<0.01).  
34  
35 Severe post-COVID syndrome was associated with radiological evidence of cardiac damage  
36  
37 (myocarditis) (p<0.05).  
38  
39  
40  
41  
42  
43  
44

45 **Conclusions:** In individuals at low risk of COVID-19 mortality with ongoing symptoms, 70%  
46  
47 have impairment in one or more organs four months after initial COVID-19 symptoms, with  
48  
49 implications for healthcare and public health, which have assumed low risk in young people  
50  
51 with no comorbidities.  
52  
53

54  
55 **Study registration:** <https://clinicaltrials.gov/ct2/show/NCT04369807>  
56  
57  
58  
59  
60



### Strengths and limitations

- This is an ongoing, prospective, longitudinal COVID-19 recovery study with biochemical and imaging characterisation of organ function, starting in April 2020 before recognition of “long-COVID”, proper testing availability and prospective COVID-19-related research.
- By recruiting ambulatory patients with broad inclusion criteria, we focused on a real world population at lower risk of COVID-19 severity and mortality.
- Healthy controls were included for comparison, not individuals with post-flu symptoms, COVID-19 without symptoms or from general clinics, which further studies may explore.
- The study population was not ethnically diverse, despite disproportionate COVID-19 impact in non-white individuals.
- To limit interaction and exposure between trial team and patients, pulse oximetry, spirometry, MRI assessment of brain and muscle function were not included from the outset.

1  
2  
3  
4  
5  
6  
7  
8  
9  
10  
11  
12  
13  
14  
15  
16  
17  
18  
19  
20  
21  
22  
23  
24  
25  
26  
27  
28  
29  
30  
31  
32  
33  
34  
35  
36  
37  
38  
39  
40  
41  
42  
43  
44  
45  
46  
47  
48  
49  
50  
51  
52  
53  
54  
55  
56  
57  
58  
59  
60

For peer review only

## **Introduction**

Early in the COVID-19 pandemic, research and clinical practice focused on pulmonary manifestations[1]. There is increasing evidence for direct multi-organ effects[2-7], as well as indirect effects on other organ systems and disease processes, such as cardiovascular diseases and cancers, through changes in healthcare delivery and patient behaviours[8–10]. The clear long-term impact on individuals and health systems underlines the urgent need for a whole body approach with assessment of all major organ systems following SARS-CoV-2

1  
2  
3 (Severe acute respiratory syndrome-coronavirus 2) infection. Quantitative MRI has recently  
4  
5  
6 been used to show multi-organ impairment in individuals post-COVID-19 hospitalisation[11],  
7  
8 but has not been used in non-hospitalised individuals.  
9

10  
11  
12  
13 COVID-19 is the convergence of an infectious disease, under-treated non-communicable  
14  
15 diseases and social determinants of health, described as a “syndemic”[12]. Pre-existing non-  
16  
17 communicable diseases and risk factors predict poor COVID-19 outcomes, whether intensive  
18  
19 care admission or mortality[10]. Research has emphasised acute SARS-CoV-2 infection,  
20  
21 hospitalised individuals, and COVID-19 mortality[13–15], which is likely to under-estimate the  
22  
23 true burden of COVID-19-related disease. Among those surviving acute infection, 10% report  
24  
25 persistent symptoms for 12 weeks or longer after initial infection (“long-COVID”, or “post  
26  
27 COVID syndrome”, PCS)[16]. However, PCS is yet to be fully defined[17-20]. Neither severity  
28  
29 of symptoms, nor medium- and long-term pathophysiology across organ systems, nor the  
30  
31 appropriate control populations are understood.  
32  
33  
34  
35  
36  
37  
38

39  
40 UK government policies have emphasised excess mortality risk in moderate- and high-risk  
41  
42 conditions, including “shielding”[10] and commissioning of a risk calculator to identify those at  
43  
44 highest risk of COVID-19 severity and mortality[21]. These policies assume that younger  
45  
46 individuals without apparent underlying conditions are at low risk. However, unlike symptoms  
47  
48 following critical illness[22] or acute phase of other coronavirus infections[23], symptoms in  
49  
50 PCS are commonly reported in individuals with low COVID-19 mortality risk, e.g. female,  
51  
52 young and no chronic co-morbidities[14]. The potential scale of PCS in “lower-risk” individuals,  
53  
54 representing up to 80% of the population[3], necessitates urgent policies across countries to  
55  
56  
57  
58  
59  
60

1  
2  
3 monitor[24], treat[19] and pay[25] for long-term implications of COVID-19, and to mitigate  
4  
5  
6 impact on healthcare utilisation and economies.  
7  
8  
9

10 Therefore, in a pragmatic, prospective cohort study of individuals with persistent symptoms at  
11  
12 least 4 weeks following recovery from acute SARS-CoV2 infection and at low risk of COVID-  
13  
14 19 mortality, we investigated: (i) prevalence of multi-organ impairment, compared with healthy,  
15  
16 age-matched controls; (ii) associations between typical COVID-19 symptoms and multi-organ  
17  
18 impairment; and (iii) associations between hospitalisation, severity of symptoms and multi-  
19  
20 organ impairment.  
21  
22  
23  
24  
25  
26  
27  
28  
29  
30  
31  
32  
33  
34  
35  
36  
37  
38  
39  
40  
41  
42  
43  
44  
45  
46  
47  
48  
49  
50  
51  
52  
53  
54  
55  
56  
57  
58  
59  
60

## **Methods**

### **Patient population and study design**

In an ongoing, prospective study, participants were recruited to the study following expressing their interest on the study registration website. Participants learnt about the study through advertisement on social media or via recommendation from clinicians from four Participant Identification Centres, the latter usually applied to patients who had been hospitalised. Assessment took place at two UK research imaging sites (Perspectum,

1  
2  
3 Oxford and Mayo Clinic Healthcare, London) between 1 April 2020 and 14 September 2020,  
4 completing baseline assessment by 14 September 2020 (**Figure 1**). Participants were eligible  
5 for enrolment with laboratory confirmed SAR-COV2 infection (tested SARS-CoV-2-positive by  
6 oro/nasopharyngeal swab by reverse-transcriptase-polymerase-chain reaction (n=62), a  
7 positive antibody test (n=63), or with strong clinical suspicion of infection with typical  
8 symptoms/signs and assessed as highly likely to have COVID-19 by two independent  
9 clinicians (n=73)). Exclusion criteria were: symptoms of active respiratory viral infection  
10 (temperature >37.8°C or three or more episodes of coughing in 24 hours); hospital discharge  
11 in the last 7 days; and contraindications to MRI, including: implanted pacemakers,  
12 defibrillators, other metallic implanted devices and claustrophobia. All participants gave written  
13 informed consent.  
14  
15  
16  
17  
18  
19  
20  
21  
22  
23  
24  
25  
26  
27  
28  
29  
30  
31

### 32 **Assessment of post-COVID syndrome**

33 Assessment included patient-reported validated questionnaires (quality of life, EQ-5D-5L[26],  
34 and dyspnoea-12[27]) and fasting biochemical investigations (listed in **Supplementary**  
35 **Methods**). PCS was classified as “severe” (defined as persistent breathlessness,  $\geq 10$  on the  
36 dyspnoea-12 score, or reported moderate or greater problems with usual activities on EQ-5D-  
37 5L), or “moderate”. These thresholds were selected as the dyspnoea-12 has been correlated  
38 with the MRC dyspnoea grade, where level 3 warrants referral to rehabilitation services[27],  
39 and with EQ-5D-5L, less than 8% of the general population report moderate or greater  
40 problems with usual activities[28].  
41  
42  
43  
44  
45  
46  
47  
48  
49  
50  
51  
52  
53  
54  
55

### 56 **Multi-organ impairment in PCS compared with healthy controls**

57  
58  
59  
60

1  
2  
3 We selected MRI as the imaging modality (as in UK Biobank) due to: (1) safety (no radiation  
4 exposure, no need for intravenous contrast, and minimal contact with the radiographer); (2)  
5 quantitative reproducibility (>95% acquisition and image processing success rate); (3)  
6 capacity for information sharing (digital data repository for independent analysis and  
7 research); and (4) rapid scalability (35-minute scan to phenotype lung, heart, kidney, liver,  
8 pancreas and spleen). Multi-organ MRI data were collected at both study sites  
9 (Oxford: MAGNETOM Aera 1.5T, Mayo Healthcare London: MAGNETOM Vida 3T; both  
10 from Siemens Healthcare, Erlangen, Germany). The COVERSCAN multi-parametric MRI  
11 assessment typically required 35 minutes per patient, including lungs, heart, liver, pancreas,  
12 kidneys and spleen by standardised methodology (**Supplementary methods**). In brief, we  
13 assessed inflammation of the heart, kidneys, liver and pancreas with quantitative T1-relaxation  
14 mapping, lung function was characterised with a dynamic structural T2-weighted lung scan  
15 estimating lung capacity, ectopic fat accumulation in the liver and pancreas from proton  
16 density fat fraction and volume of the liver and spleen measured from T1-weighted structural  
17 scan.

18  
19  
20  
21  
22  
23  
24  
25  
26  
27  
28  
29  
30  
31  
32  
33  
34  
35  
36  
37  
38  
39  
40  
41  
42 To determine impairment for each organ, we compared MRI-derived measurements from  
43 heart, lungs, kidney, liver, pancreas and spleen with reference ranges (**Table S1**), which were  
44 established as mean +/- 2 standard deviations from the healthy, age-matched control subjects  
45 (n=36), and validated by scoping literature review[11]. We defined organ impairment if  
46 quantitative T1 mapping was outside reference ranges for heart, kidney, liver and pancreas,  
47 reduced estimated lung capacity from dynamic measurements in the lungs or there was  
48 evidence of hepatomegaly, splenomegaly or ectopic fat accumulation.

### 49 **Symptoms and multi-organ impairment**

50  
51  
52  
53  
54  
55  
56  
57  
58  
59  
60

1  
2  
3 Associations between organ impairment and symptoms were visually assessed using a heat  
4 map dividing those with impairments to an organ into columns and colouring the rows by  
5  
6 map dividing those with impairments to an organ into columns and colouring the rows by  
7  
8 percentage of reported symptoms.  
9

### 10 **Hospitalisation, severity and multi-organ impairment**

11  
12 We compared mean differences in quantitative organ metrics for hospitalised versus not  
13 hospitalised and moderate versus severe PCS using Kruskal-Wallis test (Fisher's exact test  
14 for differences in binary outcomes). We defined multi-organ impairment as  $\geq 2$  organs with  
15 metrics outside the reference range. We investigated associations between multi-organ  
16 impairment and (i) being hospitalised and (ii) severe PCS with multivariate logistic regression  
17 models, adjusting for age, sex and BMI.  
18  
19  
20  
21  
22  
23  
24  
25  
26  
27  
28  
29

### 30 **Patient and public involvement and engagement**

31  
32 Patients and public have directly, and indirectly, informed our research, from design to  
33 dissemination, with regular updates and webinars, including Q&A sessions with patients.  
34  
35 Several clinician co-authors were indirectly informed by their patients in the COVERSCAN  
36 study (RB, AB) or PCS clinics (DW, MH, MC), who are members of organisations, such as  
37 Long Covid SOS (e.g. LH) and UKDoctors#Longcovid (e.g. EA). LH and EA have been  
38 involved in the research, interpretation of results, understanding implications of our results,  
39 and providing critical feedback for the manuscript.  
40  
41  
42  
43  
44  
45  
46  
47  
48  
49  
50  
51  
52  
53

### 54 **Statistical analysis**

55  
56 We performed all analyses using R version 3.6.1, using descriptive statistics to summarise  
57 baseline characteristics, and considering a p-value less than 0.05 as statistically significant.  
58  
59  
60



1  
2  
3 Mean and standard deviation (SD) were used for normally distributed-continuous, median with  
4 interquartile range (IQR) for non-normally distributed, and frequency and percentage for  
5  
6  
7  
8  
9  
10  
11  
12  
13  
14  
15  
16  
17  
18  
19  
20  
21  
22  
23  
24  
25  
26  
27  
28  
29  
30  
31  
32  
33  
34  
35  
36  
37  
38  
39  
40  
41  
42  
43  
44  
45  
46  
47  
48  
49  
50  
51  
52  
53  
54  
55  
56  
57  
58  
59  
60

cases and healthy controls, we used Kruskal-Wallis test.

For peer review only

## **Results**

### **Overall study population**

#### *Baseline characteristics*

201 individuals were included (full details regarding hospitalisation: n=199; full questionnaire data to assign PCS severity: n=193). The mean age was 44.0 (range 21-71) years and median BMI 25.7 [IQR 23-28]. 71% of individuals were female, 88% were white, 32% were healthcare workers, 19% had been hospitalised with COVID-19. Assessment (symptoms, blood and MRI) was a median 141 (IQR 110-162) days after initial symptoms. Past medical history included smoking (3%), asthma (19%), obesity (20%), hypertension (7%), diabetes (2%) and prior heart disease (5%). The healthy control group had a mean age of 39 years (range 20-70), 40% were female and had a median BMI of 23 [IQR: 21-25] (**Table 1**).

Regardless of hospitalisation, the most frequently reported symptoms were fatigue (98%), shortness of breath (88%), muscle ache (87%), and headache (83%) (**Table 1**). 99% of individuals had four or more and 42% had ten or more symptoms. 70% of individuals reported  $\geq 13$  weeks off paid employment. Of the incidental structural findings observed on MRI (n=56),

1  
2  
3 three were cardiac (atrial septal defect, bicuspid aortic valve and right atrial mass), one renal  
4  
5 (hydronephrosis), and the rest were benign cysts.  
6  
7  
8  
9

10 Haematological investigations including mean corpuscular haemoglobin concentration  
11 (MCHC, 24%), and renal, liver and lipid biochemistry, including potassium (38%), alanine  
12 transferase (14%), lactate dehydrogenase (17%), triglycerides (11%) and cholesterol (42%)  
13 were abnormally high in  $\geq 10\%$  of individuals. Bicarbonate (10%), phosphate (11%), uric acid  
14 (11%), and transferrin saturation (19%) were abnormally low in  $\geq 10\%$  of individuals (**Table**  
15 **S2**).  
16  
17  
18  
19  
20  
21  
22  
23  
24  
25  
26  
27

### 28 **Single and multi-organ impairment in PCS compared with healthy controls**

29 Organ impairment was more common in PCS than healthy controls (**Figure 2, Supplementary**  
30 **results, Figure S1**). Impairment was present in the heart in 26% (myocarditis 19%; systolic  
31 dysfunction 9%), lung in 11% (reduced vital capacity), kidney in 4% (inflammation), liver in  
32 28% (12% inflammation; 21% ectopic fat, 10% hepatomegaly) and pancreas in 40% (15%  
33 inflammation, 38% ectopic fat); and spleen in 4% (splenomegaly). (**Table 2, Figure 2**). 70% of  
34 individuals had impairment in at least one organ. 29% of individuals had multi-organ  
35 impairment, with overlap across multiple organs (**Figure 3**). Impairment in the liver, heart or  
36 lungs was associated with further organ impairment in 63%, 62% and 48% of individuals  
37 respectively (**Figure 3**).  
38  
39  
40  
41  
42  
43  
44  
45  
46  
47  
48  
49  
50  
51  
52  
53  
54  
55

### 56 **Symptoms and multi-organ impairment**

57  
58  
59  
60

1  
2  
3 Hepatic and pulmonary impairment frequently clustered together, with fatigue, muscle aches,  
4 fever and cough commonly reported. Impairment in particular organs was associated with  
5  
6 particular symptoms: pancreas (diarrhoea, fever, headache and dyspnoea); heart  
7  
8 (headache, dyspnoea and fatigue) and kidney (wheezing, runny nose, diarrhoea, cough,  
9  
10 fever, headache, dyspnoea and fatigue) (**Figure 4**).

### 11 12 13 14 15 16 17 18 **Hospitalisation, severity and multi-organ impairment**

19  
20 The hospitalised group were older ( $p=0.001$ ), had higher BMI ( $p=0.063$ ), were more likely to  
21  
22 be non-white ( $p=0.016$ ), and to report 'inability to walk' ( $p=0.009$ ) than non-hospitalised  
23  
24 individuals. There were no other statistically significant differences between risk factors or  
25  
26 symptoms between the groups. Impairment of liver, pancreas (e.g. ectopic fat in the pancreas  
27  
28 and liver, hepatomegaly) and  $\geq 2$  organs was higher in hospitalised individuals (all  $p$   
29  
30  $<0.05$ ) (**Table 2, Figure 3**). In multivariate analyses, adjusting for age, sex and BMI, liver  
31  
32 volume remained significantly associated with hospitalisation ( $p=0.001$ ). Hospitalised  
33  
34 individuals had high triglycerides (30% vs 7.2%,  $p=0.002$ ), cholesterol (60 vs 38%,  $p=0.04$ )  
35  
36 and LDL-cholesterol (57 vs 31%,  $p=0.01$ ), and low transferrin saturation (38 vs 15%,  $p=0.01$ ),  
37  
38 compared with non-hospitalised individuals. ESR (13%), bicarbonate (12%), uric acid (16%),  
39  
40 platelet count (13%) and high-sensitivity CRP (15%) were high in  $\geq 10\%$  of hospitalised  
41  
42 individuals.  
43  
44  
45  
46  
47  
48  
49  
50

51 60% ( $n=120$ ) had severe PCS, with 52% reporting persistent, moderate problems undertaking  
52  
53 usual activities (level 3 or greater in the relevant EQ-5D-5L question; 34% reported Dyspnoea-  
54  
55  $12 \geq 10$ ). Of those with severe PCS, 84% were not hospitalised, and 73% were female. There  
56  
57 was no differences in age, BMI or ethnicity between the groups. Individuals with severe PCS  
58  
59  
60

1  
2  
3 were more likely to report shortness of breath ( $p<.001$ ), headache ( $p=0.019$ ), chest pain  
4  
5  
6 ( $p=0.001$ ), abdominal pain ( $p=0.001$ ) and wheezing ( $p=0.039$ ). 25% of those with 'severe' PCS  
7  
8 had myocarditis compared to 12% with moderate PCS (unadjusted: 0.023; adjustment for age,  
9  
10 sex and BMI:  $p=0.04$ , **Figure S2**). Severe PCS was associated with higher mean cell  
11  
12 haemoglobin concentration (28% versus 17%), cholesterol (46.2 versus 32.8), CRP (10%  
13  
14 versus 3.8%) and ESR (10% versus 6%), than moderate PCS, but these differences were not  
15  
16 statistically significant (**Table S3**). Muscle aches, fever and coughing were common in severe  
17  
18 PCS, and headache was common in individuals with pancreas inflammation (**Figure 4**).  
19  
20  
21  
22  
23  
24  
25  
26  
27  
28  
29  
30

## 31 Discussion

32  
33 We report three findings in the first COVID-19 recovery study to evaluate medium-term, multi-  
34  
35 organ impairment. First, in low-risk individuals, there were chronic symptoms and mild  
36  
37 impairment in the heart, lung, liver, kidney and pancreas four months post-COVID-19,  
38  
39 compared with healthy controls. Second, cardiac impairment was more common in severe  
40  
41 PCS. Third, we demonstrate feasibility and potential utility of community-based multi-organ  
42  
43 assessment for PCS.  
44  
45  
46  
47

### 48 *Comparison with other studies*

49  
50  
51 Common symptoms were fatigue, dyspnoea, myalgia, headache and arthralgia, despite low  
52  
53 risk of COVID-19 mortality or hospitalisation. COVID-19 impact models have included age,  
54  
55 underlying conditions and mortality, but not morbidity, multi-organ impairment and chronic  
56  
57 diseases[29,30]. Even in non-hospitalised individuals, up to 10% of those infected have  
58  
59  
60

1  
2  
3 PCS[15, 31], but studies of extra-pulmonary manifestations emphasise acute illness[32]. We  
4 describe mild rather than severe organ impairment, but the pandemic's scale and high  
5  
6 infection rates in lower risk individuals signal medium- and longer- term COVID-19 impact,  
7  
8 which cannot be ignored in healthcare or policy spheres.  
9  
10

11  
12  
13 Acute myocarditis and cardiogenic shock[33] are documented in hospitalised patients with  
14  
15 COVID-19 [6]. In American athletes, recent COVID-19 was associated with myocarditis[34].  
16  
17 Although causality cannot be attributed, and post-viral syndromes have included similar  
18  
19 findings[21], we show that one quarter of low-risk individuals with PCS have mild systolic  
20  
21 dysfunction or myocarditis. The significance of these findings and associations with  
22  
23 contemporaneous abnormal echocardiography findings and long-term myocardial fibrosis and  
24  
25 impairment are unknown. Cardiac impairment, a risk factor for severe COVID-19, may have a  
26  
27 role in PCS. Two further findings deserving investigation are pancreatic abnormalities, given  
28  
29 the excess diabetes risk reported in PCS(15), and the preponderance of healthcare workers  
30  
31 at increased PCS risk (as observed for COVID-19 mortality), possibly due to higher viral  
32  
33 burden.  
34  
35  
36  
37  
38  
39

40  
41 PCS is likely to be a syndrome rather than a single condition. Despite an immunologic basis  
42  
43 for individual variations in COVID-19 progression and severity [35], prediction models have  
44  
45 high rates of bias, perform poorly[36], and focus on respiratory dysfunction and decisions for  
46  
47 ventilation in acutely unwell patients, rather than multi-organ function. Ongoing long-term  
48  
49 studies[37] exclude non-hospitalised, low-risk individuals. During a pandemic, we studied  
50  
51 subclinical organ impairment in PCS, showing low rates of incidental findings. As specialist  
52  
53 PCS services are rolled out[38,39], multi-organ assessment, monitoring and community  
54  
55 pathways have potential roles during and beyond COVID-19, but need to be evaluated.  
56  
57  
58  
59  
60

### *Implications for research, clinical practice and public health*

Our findings have three research implications. First, as countries face second waves, COVID-19 impact models should include PCS, whether quality of life, healthcare utilisation, or economic effects. Second, there is urgent need for multi-organ assessment, including blood and imaging, as well as primary and secondary care data linkage, to define PCS. Third, longitudinal studies of clustering of symptoms and organ impairment will inform health services research to plan multidisciplinary care pathways. There are three management implications. First, we signal the need for multi-organ monitoring in at least the medium-term, especially extra-pulmonary sequelae. Care pathways involving MRI (with limited access in many clinical settings) need evaluation versus other modalities to detect organ impairment (e.g. spirometry, NT-pro-BNP, ECG, echocardiography, ultrasound and blood investigations). Second, until effective vaccines and treatments are widely available, “infection suppression” (e.g. social distancing, masks, physical isolation) is the prevention strategy. Third, whether understanding baseline risk or multi-organ complications, PCS requires management across specialities (e.g. cardiology, gastroenterology) and disciplines (e.g. epidemiology, diagnostics, laboratory science)(Figure 5).

### *Limitations*

There are some limitations. First, our cardiac MRI protocol excluded gadolinium contrast due to concerns regarding COVID-19-related renal complications, relying on native T1 mapping to characterise myocardial inflammation non-invasively (previously validated for acute myocarditis)[40]. Second, for organ impairment, we show association, not causation, and incidental findings are possible in asymptomatic individuals[41], but our findings are strengthened by comparison with healthy, age-matched controls, although not matched for sex or baseline comorbidities. Third, for pragmatic reasons, our controls were scanned using

1  
2  
3 1.5T, but we used 3T ranges as described in an analogous study with similar acquisition  
4  
5 protocols. Therefore, we may be under-representing the true proportion of impairment in those  
6  
7 individuals with PCS scanned at 3T. Fourth, further studies may explore different controls, e.g.  
8  
9 individuals with post-flu symptoms, COVID-19 without symptoms or from general clinics. We  
10  
11 will investigate duration, trajectory, complications and recovery for specific symptoms and  
12  
13 organ impairment in the follow-up phase. Fifth, our study population was not ethnically diverse,  
14  
15 despite disproportionate COVID-19 impact in non-white individuals. Sixth, to limit interaction  
16  
17 and exposure between trial team and patients, pulse oximetry, spirometry, MRI assessment  
18  
19 of brain and muscle function were not included from the outset.  
20  
21  
22  
23  
24

### 25 *Conclusions*

26  
27 Our study suggests PCS has a physiological basis, with measurable patient-reported  
28  
29 outcomes and organ impairment. Future research should address longer-term follow-up of  
30  
31 organ function beyond symptoms and blood investigations, even in lower risk individuals;  
32  
33 prioritisation for imaging, investigation and referral; and optimal care pathways. Health system  
34  
35 responses should emphasise infection suppression, and management of pre- and post-  
36  
37 COVID-19 risk factors and chronic diseases.  
38  
39  
40  
41  
42  
43  
44  
45

### 46 **Contributors:**

47  
48 Study design: AD, RB, JA, COVERSCAN team

49  
50 Patient recruitment: RB, COVERSCAN team

51  
52 Data collection: MW, COVERSCAN team

53  
54 Data analysis: AD, COVERSCAN team, AB

55  
56 Data interpretation: AB, AD, MW, RB  
57  
58  
59  
60



1  
2  
3 Initial manuscript drafting: AB, AD, RB  
4

5  
6 Critical review of early and final versions of manuscript: all authors including JO and DC.  
7

8 Specialist input: cardiology (MW, AB); general medicine (RB, MH, DW, MC, DC); long  
9  
10 COVID (MH, MC, DW); imaging (MB, RB); statistics (AD); epidemiology/public health (AB);  
11  
12 primary care (MG); healthcare management (JA); patient and public involvement (LH, EA).  
13  
14

15  
16 *COVERSCAN study investigators*  
17

18  
19 Perspectum: Mary Xu, Faezah Sanaei-Nezhad, Andrew Parks, Andrea Borghetto, Matthew  
20  
21 D Robson, Petrus Jacobs, John Michael Brady, Carla Cascone, Soubera Rymell, Jacky Law,  
22  
23 Virginia Woolgar, Velko Tonev, Claire Herlihy, Rob Suriano, Tom Waddell, Henrike Puchta,  
24  
25 Alessandra Borlotti, Arun Jandor, Freddie Greatrex, Robin Jones, Georgina Pitts, Ashleigh  
26  
27 West, Marion Maguire, Anu Chandra, Naomi Jayaratne, Dali Wu, Stella Kin, Mike Linsley,  
28  
29 Valentina Carapella, Isobel Gordon, George Ralli, John McGonigle, Darryl McClymont,  
30  
31 Boyan Ivanov, James Oowler, Diogo Cunha, Tatiana Lim, Carlos Duncker, Madison Wagner,  
32  
33 Marc Goldfinger, Adriana Roca, Charlotte Erpicum, Matthew David Kelly, Rexford D  
34  
35 Newbould, Catherine J Kelly, Andrea Dennis, Sofia Mouchti, Arina Kazimianec, Helena  
36  
37 Thomaides-Briers, Rajarshi Banerjee  
38  
39

40  
41 University College London: Amitava Banerjee  
42

43  
44 Great Western Hospitals NHS Foundation Trust: Malgorzata Wamil  
45

46  
47 University of Oxford: Yi-Chun Wang, Tom Waddell  
48

49  
50 Mayo Clinic: Sandeep Kapur and Louise McLaughlin  
51

52 **Funding:**  
53

54  
55 This work was supported by the UK's National Consortium of Intelligent Medical Imaging  
56  
57 (Industry Strategy Challenge Fund), Innovate UK (Grant 104688) and the European Union's  
58  
59 Horizon 2020 research and innovation programme (agreement No 719445). The research was  
60

1  
2  
3 designed, conducted, analysed, and interpreted by the authors independently of the funding  
4  
5 sources.  
6  
7

8 **Competing interests:** All authors have completed the ICMJE uniform disclosure form  
9  
10 at [www.icmje.org/coi\\_disclosure.pdf](http://www.icmje.org/coi_disclosure.pdf). AD, RB and MB are employees of Perspectum. All other  
11  
12 authors declare no financial relationships with any organisations that might have an interest  
13  
14 in the submitted work in the previous three years; no other relationships or activities that could  
15  
16 appear to have influenced the submitted work.  
17  
18

### 19 20 **Ethical approval**

21  
22 The study (<https://clinicaltrials.gov/ct2/show/NCT04369807>) had ethical approval  
23  
24 (20/SC/0185).  
25  
26

### 27 28 **Data sharing statement**

29  
30 Deidentified participant data are available from the corresponding authors on request.  
31

### 32 33 **Transparency statement**

34  
35 AB affirms that this manuscript is an honest, accurate, and transparent account of the  
36  
37 reported study; that no important study aspects have been omitted; and that any  
38  
39 discrepancies from the study as planned (and, if relevant, registered) have been explained.  
40  
41

42 **Dissemination to participants and related patient and public communities:** The results of this  
43  
44 study will be disseminated to relevant patient organisations (e.g. Long COVID SOS),  
45  
46 policymakers and health professionals.  
47  
48

49 **Provenance and peer review:** Not commissioned; externally peer reviewed.  
50  
51  
52  
53  
54  
55  
56  
57  
58  
59  
60

1  
2  
3  
4  
5  
6  
7  
8  
9  
10  
11  
12  
13  
14  
15  
16  
17  
18  
19  
20  
21  
22  
23  
24  
25  
26  
27  
28  
29  
30  
31  
32  
33  
34  
35  
36  
37  
38  
39  
40  
41  
42  
43

## Figures and Table Titles and Legends

44 Table 1: Baseline demographics and symptoms in 201 low-risk individuals with post COVID syndrome.

45  
46  
47 *\*Data are presented as count (%). Comparisons between managed at home vs hospitalised,*  
48 *and between moderate vs post-COVID syndrome were conducted using Fisher's exact test.*  
49  
50

51  
52  
53  
54  
55 Table 2: Evidence of organ impairment in 201 low-risk individuals with post COVID syndrome.

56  
57  
58 *\*Data are presented as count (%). Comparisons between managed at home vs hospitalised,*  
59 *and between moderate vs post-COVID syndrome were conducted using Fisher's exact test.*  
60

1  
2  
3  
4  
5  
6  
7 Figure 1: Flow from recruitment to enrolment of 201 patients with post COVID syndrome.  
8  
9  
10

11 Figure 2. Percentage of patients (black) and controls (grey) with individual organ measures  
12 outside of the pre-defined normal range. Lines represent significant difference in the  
13 proportions between the two groups and significant stars represent \* $p < 0.05$ ; \*\* $p < 0.01$ ; \*\*\*  
14  $p < .001$ .  
15  
16  
17  
18  
19  
20  
21  
22

23  
24 Figure 3: Multi-organ impairment in low-risk individuals with post COVID syndrome by  
25 gender and hospitalisation.  
26  
27  
28

29 Figure 4: Percentage of reported symptoms during the acute phases of the illness within  
30 those with evidence of organ impairment for each organ separately. Darker red indicates  
31 higher percentage of reported symptoms per impaired organ, there are no distinct patterns of  
32 symptoms relating to each impaired organ but highlights a high burden of symptoms  
33 individual  
34  
35  
36  
37  
38

39 Figure 5: Natural history of post COVID syndrome, the COVERSCAN study in low-risk  
40 individuals (n=201) and policy recommendations.  
41  
42  
43  
44  
45  
46  
47  
48  
49  
50  
51  
52  
53  
54  
55  
56  
57  
58  
59  
60

Table 3: Baseline demographics and symptoms in 201 low-risk individuals with post COVID syndrome.

|                                               | All Patients (n=201) | Healthy Controls (N=36) | P      | Not hospitalised (n=163) | Hospitalised (n=37) | P     | Moderate PCS (n=77) | Severe PCS (n=116) | p     |
|-----------------------------------------------|----------------------|-------------------------|--------|--------------------------|---------------------|-------|---------------------|--------------------|-------|
| <b>Age</b> (yrs, mean; sd)                    | 44 (11.0)            | 39 (12.4)               | 0.013  | 43 (10.9)                | 50 (10.0)           | 0.001 | 45 (12.2)           | 44 (10.0)          | 0.419 |
| <b>Female</b> (No, %)                         | 142 (70.6)           | 14 (38.9)               | 0.032  | 118 (72.4)               | 23 (62.2)           | 0.302 | 51 (66.2)           | 85 (73.3)          | 0.374 |
| <b>BMI</b> (kg.m <sup>-2</sup> ); median(IQR) | 25.7(22.7-28.1)      | 23.2 (21.4-23.1)        | <0.001 | 25.3 (22.7-27.7)         | 27.2 (23.1-31.0)    | 0.063 | 25.8 (22.7-27.9)    | 25.4 (22.5-28.2)   | 0.639 |
| <b>Ethnicity</b>                              |                      |                         |        |                          |                     |       |                     |                    |       |
| White                                         | 176 (87.6)           | 33 (91.7)               | 0.904  | 148 (90.8)               | 28 (75.7)           | 0.016 | 67 (87.0)           | 106 (91.4)         | 0.178 |
| Mixed                                         | 3 (1.5)              | 0 (0)                   |        | 3 (1.8)                  | 0 (0)               |       | 1 (1.3)             | 2 (1.7)            |       |
| South Asian                                   | 7 (3.5)              | 3 (8.3)                 |        | 4 (2.5)                  | 3 (8.1)             |       | 5 (6.5)             | 0 (0)              |       |
| Black                                         | 4 (2.0)              | 0 (0)                   |        | 1 (0.6)                  | 2 (5.4)             |       | 2 (2.6)             | 2 (1.7)            |       |
| <b>Comorbidities and risks</b>                |                      |                         |        |                          |                     |       |                     |                    |       |
| <b>Smoking</b>                                |                      |                         |        |                          |                     |       |                     |                    |       |
| Never                                         | 133 (66.2)           | 20 (60.6)               |        | 108 (66.3)               | 24 (64.9)           |       | 55 (71.4)           | 72 (61.7)          | 0.244 |
| Current                                       | 6 (3.0)              | 8 (24.2)                | <0.001 | 6 (3.7)                  | 0 (0)               | 0.641 | 3 (3.9)             | 3 (2.6)            |       |
| Ex-smoker                                     | 62 (30.8)            | 5 (15.2)                |        | 49 (30.1)                | 13 (35.1)           |       | 19 (24.7)           | 41 (35.3)          |       |
| <b>Health care worker</b>                     | 64 (31.8)            | 4 (12.1)                | 0.009  | 50 (30.7)                | 13 (35.1)           | 0.695 | 33 (42.9)           | 28 (24.1)          | 0.007 |
| <b>Asthma</b>                                 | 37 (18.4)            | 0 (0)                   | 0.002  | 34 (20.9)                | 3 (8.1)             | 0.099 | 13 (16.9)           | 22 (19.0)          | 0.849 |
| <b>BMI</b>                                    |                      |                         |        |                          |                     |       |                     |                    |       |
| ≥25 kg/m <sup>2</sup>                         | 113 (56.5)           | 7 (20)                  |        | 87 (53.7)                | 25 (67.6)           | 0.144 | 46 (60.5)           | 62 (53.4)          | 0.374 |
| ≥30 kg/m <sup>2</sup>                         | 40 (20.0)            | 0 (0)                   |        | 28 (17.3)                | 12 (32.4)           | 0.066 | 16 (21.1)           | 24 (20.7)          | 1.000 |
| <b>Hypertension</b>                           | 13 (6.5)             | 0 (0)                   | 0.001  | 11 (6.7)                 | 2 (5.4)             | 1.000 | 6 (7.8)             | 7 (6.0)            | 0.771 |
| <b>Diabetes</b>                               | 4 (2.0)              | 0 (0)                   | 0.104  | 4 (2.5)                  | 0 (0.0)             | 1.000 | 4 (5.2)             | 0 (0.0)            | 0.024 |
| <b>Previous heart disease</b>                 | 9 (4.5)              | 0 (0)                   | 0.001  | 8 (4.9)                  | 1 (2.7)             | 1.000 | 3 (3.9)             | 5 (4.3)            | 1.000 |
| <b>Symptoms</b>                               |                      |                         |        |                          |                     |       |                     |                    |       |

1  
2  
3  
4  
5  
6  
7  
8  
9  
10  
11  
12  
13  
14  
15  
16  
17  
18  
19  
20  
21  
22  
23  
24  
25  
26  
27  
28  
29  
30  
31  
32  
33  
34  
35  
36  
37  
38  
39  
40  
41  
42  
43  
44  
45  
46

|                                                              |                |  |  |               |              |       |              |               |         |
|--------------------------------------------------------------|----------------|--|--|---------------|--------------|-------|--------------|---------------|---------|
| Fatigue                                                      | 196 (98.0)     |  |  | 159 (97.5)    | 37 (100.0)   | 1.000 | 73 (96.1)    | 115 (99.1)    | 0.302   |
| Shortness of breath                                          | 176 (88.0)     |  |  | 141 (86.5)    | 35 (94.6)    | 0.262 | 58 (76.3)    | 112 (96.6)    | <0.0001 |
| Muscle ache                                                  | 173 (86.5)     |  |  | 142 (87.1)    | 31 (83.8)    | 0.597 | 66 (86.8)    | 101 (87.1)    | 1.000   |
| Headache                                                     | 165 (82.5)     |  |  | 138 (84.7)    | 27 (73.0)    | 0.098 | 56 (73.7)    | 102 (87.9)    | 0.019   |
| Joint pain                                                   | 156 (78.0)     |  |  | 127 (77.9)    | 29 (78.4)    | 1.000 | 56 (73.7)    | 94 (81.0)     | 0.284   |
| Chest pain                                                   | 152 (76.0)     |  |  | 128 (78.5)    | 24 (64.9)    | 0.090 | 47 (61.8)    | 98 (84.5)     | 0.001   |
| Cough                                                        | 146 (73.0)     |  |  | 117 (71.8)    | 29 (78.4)    | 0.539 | 55 (72.4)    | 84 (72.4)     | 1.000   |
| Fever                                                        | 144 (72.0)     |  |  | 113 (69.3)    | 31 (83.8)    | 0.104 | 51 (67.1)    | 86 (74.1)     | 0.329   |
| Sore throat                                                  | 143 (71.5)     |  |  | 120 (73.6)    | 23 (62.2)    | 0.165 | 50 (65.8)    | 86 (74.1)     | 0.256   |
| Diarrhoea                                                    | 118 (59.0)     |  |  | 91 (55.8)     | 27 (73.0)    | 0.065 | 40 (52.6)    | 76 (65.5)     | 0.097   |
| Abnormal pain                                                | 108 (54.0)     |  |  | 91 (55.8)     | 17 (45.9)    | 0.361 | 30 (39.5)    | 75 (64.7)     | 0.001   |
| Wheezing                                                     | 98 (49.0)      |  |  | 75 (46.0)     | 23 (62.2)    | 0.101 | 30 (39.5)    | 64 (55.2)     | 0.039   |
| Inability to walk                                            | 80 (40.0)      |  |  | 58 (35.6)     | 22 (59.5)    | 0.009 | 24 (31.6)    | 50 (43.1)     | 0.130   |
| Runny nose                                                   | 68 (34.0)      |  |  | 55 (33.7)     | 13 (35.1)    | 0.85  | 24 (31.6)    | 41 (35.3)     | 0.642   |
| <b>Time interval</b>                                         |                |  |  |               |              |       |              |               |         |
| <b>Initial symptoms-to-assessment (days): median (IQR)</b>   | 141 (110, 162) |  |  | 141 (112-163) | 138 (97-150) | 0.106 | 121 (89-158) | 145 (121-163) | 0.001   |
| <b>COVID-19 positive-to-assessment (days): median, (IQR)</b> | 71 (41, 114)   |  |  | 68 (35-112)   | 105 (59-126) | 0.012 | 60 (43,98)   | 78 (34-119)   | 0.305   |

Table 4: Evidence of organ impairment in 201 low-risk individuals with post COVID syndrome.

| Measurement                                                  | All Patients (n=201) | Healthy Controls (n=36) | P     | Not hospitalised (n=163) | Hospitalised (n=37) | P     | Moderate PCS (n=77) | Severe PCS (n=116) | P     |
|--------------------------------------------------------------|----------------------|-------------------------|-------|--------------------------|---------------------|-------|---------------------|--------------------|-------|
| <b>HEART</b>                                                 |                      |                         |       |                          |                     |       |                     |                    |       |
| <b>Left ventricular ejection fraction (%)</b>                |                      |                         |       |                          |                     |       |                     |                    |       |
| • Normal (>51%)                                              | 190 (95.0)           | 35 (97.2)               | 0.699 | 155 (95.7)               | 33 (89.1)           | 0.124 | 72 (93.5)           | 111 (95.7)         | 0.353 |
| • Impaired (≤51%)                                            | 11 (5.0)             | 1 (2.8)                 |       | 7 (4.3)                  | 4 (10.1)            |       | 5 (6.4)             | 5 (4.3)            |       |
| <b>Left ventricular end diastolic volume (ml)</b>            |                      |                         |       |                          |                     |       |                     |                    |       |
| • >264ml in M; >206ml in W                                   | 8 (4.0)              | 1 (2.8)                 | 1.00  | 4 (2.5)                  | 4 (10.8)            | 0.040 | 4 (5.2)             | 4 (3.4)            | 0.715 |
| <b>Evidence of myocarditis</b>                               |                      |                         |       |                          |                     |       |                     |                    |       |
| • ≥ 3 segments with high T1 (≥1229ms at 3T; ≥1015ms at 1.5T) | 39 (19.4)            | 2 (5.6)                 | 0.053 | 30 (18.4)                | 8 (21.6)            | 0.647 | 9 (11.7)            | 29 (25.0)          | 0.027 |

1  
2  
3  
4  
5  
6  
7  
8  
9  
10  
11  
12  
13  
14  
15  
16  
17  
18  
19  
20  
21  
22  
23  
24  
25  
26  
27  
28  
29  
30  
31  
32  
33  
34  
35  
36  
37  
38  
39  
40  
41  
42  
43  
44  
45  
46

|                                              |                |                |        |  |                |               |         |               |               |       |
|----------------------------------------------|----------------|----------------|--------|--|----------------|---------------|---------|---------------|---------------|-------|
| <b>LUNGS</b>                                 |                |                |        |  |                |               |         |               |               |       |
| <b>Deep Breathing Fractional area change</b> | (n=17 missing) |                |        |  | (n=13 missing) | (n=3 missing) |         | (n=8 missing) | (n=7 missing) |       |
| • < 31%                                      | 21 (11.4)      | 1 (2.8)        | 0.138  |  | 17 (11.3)      | 4 (11.8)      | 1       | 7 (10.1)      | 13 (11.9)     | 0.811 |
| <b>KIDNEYS</b>                               |                |                |        |  |                |               |         |               |               |       |
| <b>Kidney cortex T1</b>                      | (n=3 missing)  |                |        |  | (n=3 missing)  |               |         | (n=2 missing) |               |       |
| • Normal (<1652 ms at 3T; <1227ms at 1.5T)   | 191 (96.5)     | 36 (100.0)     | 0.599  |  | 155 (96.9)     | 35 (94.6)     | 0.618   | 74 (98.7)     | 112 (96.6)    | 0.65  |
| • Impaired (≥1652 ms at 3T; ≥1227ms at 1.5T) | 7 (3.5)        | 0 (0.0)        |        |  | 5 (3.1)        | 2 (5.4)       |         | 1 (1.3)       | 4 (3.4)       |       |
| <b>PANCREAS</b>                              |                |                |        |  |                |               |         |               |               |       |
| <b>Pancreatic inflammation (T1 in ms)</b>    | (n=11 missing) | (n=13 missing) |        |  | (n=7 missing)  | (n=4 missing) |         | (n=4 missing) | (n=6 missing) |       |
| • Normal <803ms                              | 162 (85.3)     | 23 (100.0)     | 0.049  |  | 139 (89.1)     | 22 (66.7)     | 0.002   | 60 (82.2)     | 95 (86.4)     | 0.530 |
| • Impaired ≥803ms                            | 28 (14.7)      | 0 (0)          |        |  | 17 (10.9)      | 11 (33.3)     |         | 13 (17.8)     | 15 (13.6)     |       |
| <b>Pancreatic fat</b>                        |                | (n=4 missing)  |        |  |                |               |         |               |               |       |
| • Normal <4.6%                               | 122 (62.2)     | 30 (93.8)      | <0.001 |  | 107 (66.9)     | 14 (40.0)     | 0.004   | 44 (57.9)     | 72 (63.7)     | 0.449 |
| • Impaired ≥4.6%                             | 74 (37.8)      | 2 (6.2)        |        |  | 53 (33.1)      | 21 (60.0)     |         | 32 (42.1)     | 41 (36.3)     |       |
| <b>LIVER</b>                                 |                |                |        |  |                |               |         |               |               |       |
| <b>Liver Inflammation (cT1 in ms)</b>        | (n=1 missing)  |                |        |  | (n=1 missing)  |               |         | (n=1 missing) |               |       |
| • Normal <784ms                              | 177 (88.5)     | 36 (100)       | 0.030  |  | 148 (91.4)     | 28 (75.7)     | 0.018   | 69 (90.8)     | 101 (87.1)    | 0.494 |
| • Impaired ≥784ms                            | 23 (11.5)      | 0 (0)          |        |  | 14 (8.6)       | 9 (24.3)      |         | 7 (9.2)       | 15 (12.9)     |       |
| <b>Liver fat</b>                             |                |                |        |  |                |               |         |               |               |       |
| • Normal <4.8%                               | 159 (79.1)     | 34 (94.4)      | 0.034  |  | 134 (82.2)     | 24 (64.9)     | 0.026   | 61 (79.2)     | 91 (78.4)     | 1     |
| • Impaired ≥4.8%                             | 42 (20.9)      | 2 (5.4)        |        |  | 29 (17.8)      | 13 (35.1)     |         | 16 (20.8)     | 25 (21.6)     |       |
| <b>Liver volume</b>                          |                | (n=1 missing)  |        |  |                |               |         |               |               |       |
| • Normal <1935ml                             | 180 (89.6)     | 34 (97.1)      | 0.214  |  | 154 (94.5)     | 25 (67.6)     | <0.0001 | 68 (88.3)     | 104 (89.7)    | 0.816 |
| • Impaired ≥1935ml                           | 21 (10.4)      | 1 (2.9)        |        |  | 9 (5.5)        | 12 (32.4)     |         | 9 (11.7)      | 12 (10.3)     |       |
| <b>SPLEEN</b>                                |                |                |        |  |                |               |         |               |               |       |
| <b>Splenic volume (ml)</b>                   |                | (n=1 missing)  |        |  |                |               |         |               |               |       |
| • Normal <350ml                              | 194 (96.5)     | 32 (91.4)      | 0.172  |  | 160 (98.2)     | 33 (89.2)     | 0.023   | 74 (96.1)     | 112 (96.6)    | 1     |
| • Impaired ≥350ml                            | 7 (3.5)        | 3 (8.6)        |        |  | 3 (1.8)        | 4 (10.8)      |         | 3 (3.9)       | 4 (3.4)       |       |

1  
2  
3  
4  
5  
6  
7  
8  
9  
10  
11  
12  
13  
14  
15  
16  
17  
18  
19  
20  
21  
22  
23  
24  
25  
26  
27  
28  
29  
30  
31  
32  
33  
34  
35  
36  
37  
38  
39  
40  
41  
42  
43  
44  
45  
46

*\*Data are presented as count (%). Comparisons between managed at home vs hospitalised, and between moderate vs post-COVID syndrome were conducted using Fisher's exact test.*

For peer review only



## References

1. World Health Organization. Clinical management of severe acute respiratory infection (SARI) when COVID-19 disease is suspected. Interim guidance 13 March 2020. <https://apps.who.int/iris/handle/10665/331446>
2. Pavon AG, Meier D, Samim D, Rotzinger DC, Fournier S, Marquis P, et al. First Documentation of Persistent SARS-Cov-2 Infection Presenting With Late Acute Severe Myocarditis. *Can J Cardiol.* 2020;36(8):1326.e5-1326.e7.
3. Puntmann VO, Carerj ML, Wieters I, Fahim M, Arendt C, Hoffmann J, et al. Outcomes of Cardiovascular Magnetic Resonance Imaging in Patients Recently Recovered from Coronavirus Disease 2019 (COVID-19). *JAMA Cardiol.* 2020;2019(11):1265–73.
4. Tabary M, Khanmohammadi S. Pathologic features of COVID-19: A concise review. *Pathol - Res Pract.* 2020;216(9): 153097.
5. Alqahtani SA, Schattenberg JM. Liver injury in COVID-19: The current evidence. *United Eur Gastroenterol J.* 2020;8(5):509–19.
6. Somasundaram NP, Ranathunga I, Ratnasamy V, Wijewickrama PSA, Dissanayake HA, Yogendranathan N, et al. The impact of SARS-Cov-2 virus infection on the endocrine system. *J Endocr Soc.* 2020;4(8):1–22.
7. Farouk SS, Fiaccadori E, Cravedi P, Campbell KN. COVID-19 and the kidney: what we think we know so far and what we don't. *J Nephrol.* 2020. Jul 20 : 1–6.
8. Lai A, Pasea L, Banerjee A, Denaxas S, Katsoulis M, Chang W, et al. Estimating excess mortality in people with cancer and multimorbidity in the COVID-19 emergency. *BMJ Open.* 2020. Nov 17;10(11):e043828.
9. Banerjee A, Pasea L, Harris S, Gonzalez-Izquierdo A, Torralbo A, Shallcross L, et al. Estimating excess 1-year mortality associated with the COVID-19 pandemic according to underlying conditions and age: a population-based cohort study. *Lancet.* 2020;395(10238):1715–25.
10. Banerjee A, Chen S, Pasea L, Lai A, Katsoulis M, Denaxas S, et al. Excess deaths in people with cardiovascular diseases during the COVID-19 pandemic. *Eur J Prev Cardiol.* 2020. In press.
11. Raman B, Philip Cassar M, Tunnicliffe EM, Filippini N, Griffanti L, Alfaro-Almagro F, et al. Medium-term effects of SARS-CoV-2 infection on multiple vital organs, exercise capacity, cognition, quality of life and mental health, post-hospital discharge. *EClinicalMedicine.* 2021 Jan 7;31:100683.
12. Horton R. Offline: COVID-19 is not a pandemic. *Lancet.* 2020;396(10255):874.
13. Shovlin CL, Vizcaychipi MP. Implications for COVID-19 triage from the ICNARC report of 2204 COVID-19 cases managed in UK adult intensive care units. *Emerg Med J.*

- 1  
2  
3  
4  
5  
6  
7  
8  
9  
10  
11  
12  
13  
14  
15  
16  
17  
18  
19  
20  
21  
22  
23  
24  
25  
26  
27  
28  
29  
30  
31  
32  
33  
34  
35  
36  
37  
38  
39  
40  
41  
42  
43  
44  
45  
46  
47  
48  
49  
50  
51  
52  
53  
54  
55  
56  
57  
58  
59  
60
- 2020;37(6):332–3.
14. Docherty AB, Harrison EM, Green CA, Hardwick HE, Pius R, Norman L, et al. Features of 20 133 UK patients in hospital with covid-19 using the ISARIC WHO Clinical Characterisation Protocol: Prospective observational cohort study. *BMJ*. 2020;369:1–12.
15. Williamson E, Walker A, Bhaskaran K, Bacon S, Curtis H, Mehrkar A, et al. Factors associated with COVID-19-related death using OpenSAFELY. *Nature*. 2020; 584(7821):430-436.
16. Office for National Statistics. The prevalence of long COVID symptoms and COVID-19 complications. 16 December 2020. <https://www.ons.gov.uk/news/statementsandletters/theprevalenceoflongcovidsymptomsandcovid19complications>
17. Del Rio C, Collins L, Malani P. Long-term Health Consequences of COVID-19 Carlos. *JAMA*. 2020;324(17).
18. Carfi A, Bernabei R, Landi F. Persistent Symptoms in Patients After Acute COVID-19. *JAMA*. 2020;324(6):604–5.
19. Nabavi N. Long covid: How to define it and how to manage it. *BMJ*. 2020;370:m3489.
20. Greenhalgh T, Knight M, A’Court C, Buxton M, Husain L. Management of post-acute covid-19 in primary care. *BMJ*. 2020;370.
21. National Institute for Health Research: New risk prediction model could help improve guidance for people shielding from COVID-19. June 2020. <https://www.nihr.ac.uk/news/new-risk-prediction-model-could-help-improve-guidance-for-people-shielding-from-covid-19/25096>
22. Hill AD, Fowler RA, Pinto R, Herridge MS, Cuthbertson BH, Scales DC. Long-term outcomes and healthcare utilization following critical illness - a population-based study. *Crit Care*. 2016;20(1):1–10.
23. Perrin R. Into the looking glass: Post-viral syndrome post COVID-19. *Med Hypotheses*. 2020;144.
24. George PM, Barratt SL, Condliffe R, Desai SR, Devaraj A, Forrest I, et al. Respiratory follow-up of patients with COVID-19 pneumonia. *Thorax*. 2020;75(11):1009–16.
25. Jiang DH, McCoy RG. Planning for the Post-COVID Syndrome: How Payers Can Mitigate Long-Term Complications of the Pandemic. *J Gen Intern Med*. 2020;35(10):3036–9.
26. Janssen MF, Pickard AS, Golicki D, Gudex C, Niewada M, Scalone L, et al. Measurement properties of the EQ-5D-5L compared to the EQ-5D-3L across eight patient groups: A multi-country study. *Qual Life Res*. 2013;22(7):1717–27.

- 1  
2  
3  
4 27. Yorke J, Moosavi SH, Shuldham C, Jones PW. Quantification of dyspnoea using  
5 descriptors: development and initial testing of the Dyspnoea-12. *Thorax*.  
6 2010;65(1):21–6.  
7
- 8 28. Hobbins A, Barry L, Kelleher D, O'Neill C. The health of the residents of Ireland:  
9 Population norms for Ireland based on the EQ-5D-5L descriptive system – a cross  
10 sectional study. *HRB Open Res*. 2018;1:22.  
11
- 12 29. Gupta A, Madhavan M V., Sehgal K, Nair N, Mahajan S, Sehrawat TS, et al.  
13 Extrapulmonary manifestations of COVID-19. *Nat Med*. 2020;26(7):1017–32.  
14
- 15 30. Palmer K, Monaco A, Kivipelto M, Onder G, Maggi S, Michel JP, et al. The potential  
16 long-term impact of the COVID-19 outbreak on patients with non-communicable  
17 diseases in Europe: consequences for healthy ageing. *Aging Clin Exp Res [Internet]*.  
18 2020;32(7):1189–94.  
19
- 20 31. Menni C, Valdes AM, Freidin MB, Sudre CH, Nguyen LH, Drew DA, et al. Real-time  
21 tracking of self-reported symptoms to predict potential COVID-19. *Nat Med*.  
22 2020;26(7):1037–40.  
23
- 24 32. Mandal S, Barnett J, Brill S, Brown J, Denny E, Hare S, et al. “Long-COVID”: a  
25 cross-sectional study of persisting symptoms, biomarker and imaging abnormalities  
26 following hospitalisation for COVID-19. *Thorax*. 2020; Nov 10;thoraxjnl-2020-215818.  
27
- 28 33. Chau VQ, Giustino G, Mahmood K, Oliveros E, Neibart E, Oloomi M, et al.  
29 Cardiogenic shock and hyperinflammatory syndrome in young males with COVID-19.  
30 *Circ Hear Fail*. 2020;556–9.  
31
- 32 34. Rajpal S, Tong MS, Borchers J, Zareba KM, Obarski TP, Simonetti OP, et al.  
33 Cardiovascular Magnetic Resonance Findings in Competitive Athletes Recovering  
34 from COVID-19 Infection. *JAMA Cardiol*. 2020;5–7.  
35
- 36 35. Mathew D, Giles JR, Baxter AE, Oldridge DA, Greenplate AR, Wu JE, et al. Deep  
37 immune profiling of COVID-19 patients reveals distinct immunotypes with therapeutic  
38 implications. *Science*. 2020; 369(6508):eabc8511.  
39
- 40 36. Wynants L, Van Calster B, Collins GS, Riley RD, Heinze G, Schuit E, et al. Prediction  
41 models for diagnosis and prognosis of covid-19: Systematic review and critical  
42 appraisal. *BMJ*. 2020;369 :m1328.  
43
- 44 37. PHOSP-COVID: Post-HOSPitalisation COVID-19 study. <https://www.phosp.org/>  
45
- 46 38. NHS to offer 'long covid' sufferers help at specialist centres.  
47 <https://www.england.nhs.uk/2020/10/nhs-to-offer-long-covid-help/>  
48
- 49 39. National Institute for Health and Care Excellence. COVID-19 rapid guideline:  
50 managing the long-term effects of COVID-19. 18 December 2020.  
51 <https://www.nice.org.uk/guidance/ng188>  
52  
53  
54  
55  
56  
57  
58  
59  
60

- 1  
2  
3  
4 40. Ferreira VM, Piechnik SK, Armellina ED, Karamitsos TD, Francis JM, Ntusi N, et al.  
5 Native T1-mapping detects the location , extent and patterns of acute myocarditis  
6 without the need for gadolinium contrast agents. 2014;16(1):1–11.  
7  
8 41. Gibson LM, Paul L, Chappell FM, Macleod M, Whiteley WN, Salman RAS, et al.  
9 Potentially serious incidental findings on brain and body magnetic resonance imaging  
10 of apparently asymptomatic adults: Systematic review and meta-analysis. BMJ.  
11 2018;363: k4577.  
12  
13  
14  
15  
16  
17  
18  
19  
20  
21  
22  
23  
24  
25  
26  
27  
28  
29  
30  
31  
32  
33  
34  
35  
36  
37  
38  
39  
40  
41  
42  
43  
44  
45  
46  
47  
48  
49  
50  
51  
52  
53  
54  
55  
56  
57  
58  
59  
60

For peer review only



Figure 1. Flow from recruitment to enrolment of 201 patients with post COVID syndrome.

1  
2  
3  
4  
5  
6  
7  
8  
9  
10  
11  
12  
13  
14  
15  
16  
17  
18  
19  
20  
21  
22  
23  
24  
25  
26  
27  
28  
29  
30  
31  
32  
33  
34  
35  
36  
37  
38  
39  
40  
41  
42  
43  
44  
45  
46  
47  
48  
49  
50  
51  
52  
53  
54  
55  
56  
57  
58  
59  
60

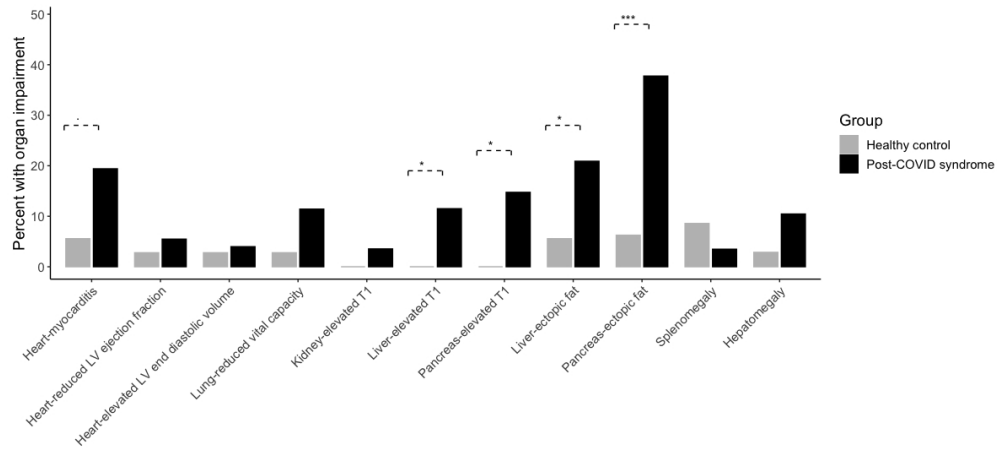

Figure 2. Organ impairment in low-risk individuals with post COVID syndrome (n=201) compared to healthy controls (n=36).

Significance: . p=0.05; \*p<0.05; \*\*p<0.01; \*\*\* p<.001.

418x206mm (72 x 72 DPI)

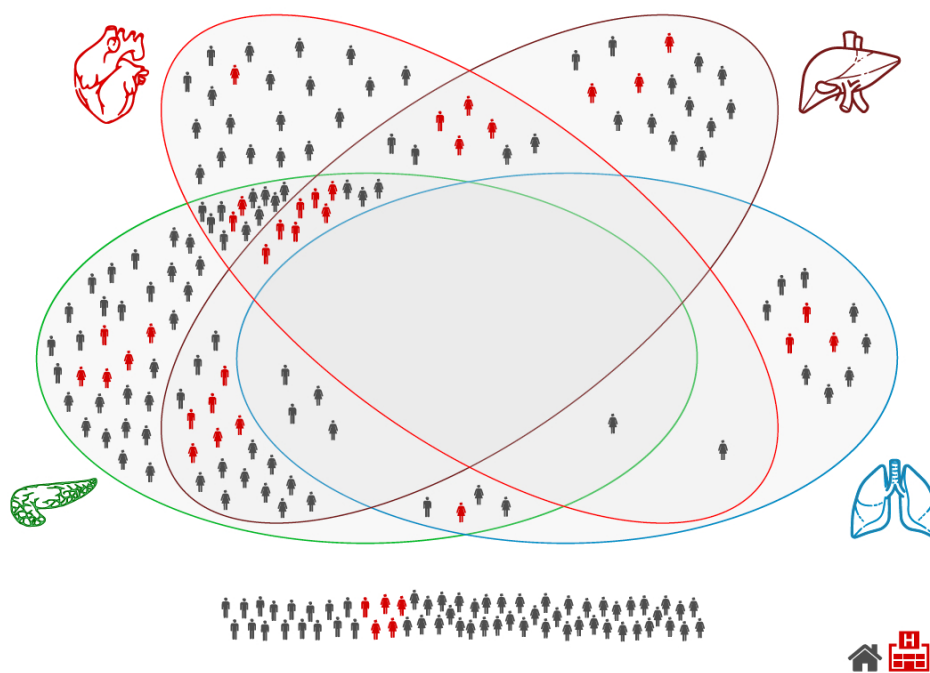

Figure 3. Multi-organ impairment in low-risk individuals with post COVID syndrome by gender and hospitalisation.

198x141mm (144 x 144 DPI)

1  
2  
3  
4  
5  
6  
7  
8  
9  
10  
11  
12  
13  
14  
15  
16  
17  
18  
19  
20  
21  
22  
23  
24  
25  
26  
27  
28  
29  
30  
31  
32  
33  
34  
35  
36  
37  
38  
39  
40  
41  
42  
43  
44  
45  
46  
47  
48  
49  
50  
51  
52  
53  
54  
55  
56  
57  
58  
59  
60

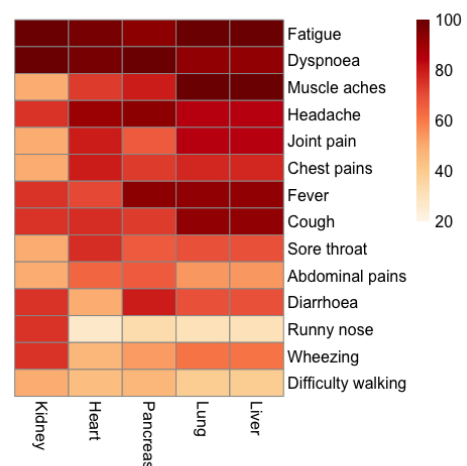

Figure 4: Reported symptoms and organ impairment in individuals with severe post COVID syndrome.

Darker red indicates higher percentage of reported symptoms per impaired organ.

349x206mm (72 x 72 DPI)





Figure 5: Natural history of post COVID syndrome, the COVERSCAN study in low-risk individuals (n=201) and policy recommendations.

338x190mm (96 x 96 DPI)

**Web Supplementary Materials**

|                                                                                                                                        |    |
|----------------------------------------------------------------------------------------------------------------------------------------|----|
| Supplementary methods                                                                                                                  | 2  |
| Supplementary references                                                                                                               | 4  |
| Supplementary results                                                                                                                  | 6  |
| Figure S1: Comparison of patients to control quantitative image derived measures in a subset of those scanned at 1.5T                  | 6  |
| Figure S2: Organ impairment in severe versus moderate post COVID syndrome (n=201)                                                      | 7  |
| Table S1: Reference ranges to define organ impairment                                                                                  | 7  |
| Table S2: Blood investigations in 201 low-risk individuals with post-COVID syndrome, sub-divided by hospitalisation or managed at home | 8  |
| Table S3: Blood investigations in 201 low-risk individuals, sub-divided by those with severe of moderate post-COVID syndrome           | 13 |

## **Supplementary methods**

### **Blood investigations**

Blood investigations included: full blood count, serum biochemistry (sodium, chloride, bicarbonate, urea, creatinine, bilirubin, alkaline phosphatase, aspartate transferase, alanine transferase, lactate dehydrogenase, creatinine kinase, gamma-glutamyl transpeptidase, total protein, albumin, globulin, calcium, magnesium, phosphate, uric acid, fasting triglycerides, cholesterol (total, HDL, LDL), iron, iron-binding capacity (unsaturated and total) and inflammatory markers (erythrocyte sedimentation rate, ESR; high sensitivity-C-Reactive Protein, CRP) (TDL laboratories, London).

### **Imaging**

All the imaging methods can be deployed on standard clinical MRI scanners and are generally expedited approaches of methods previously demonstrated in the scientific literature that unless stated each utilise a short (<14seconds) breath-hold.

Cardiac imaging involved complete coverage of the heart with a short-axis stack (to the valve plane) of cine images acquired using cardiac gating, this acquisition mirrors that in UK Biobank and is a standardized approach(S1). Three short-axis cardiac T1 maps are acquired using the MOLLI-T1 approach at the basal, mid and apical levels of the left ventricle.

Liver and pancreas imaging used the LiverMultiScan acquisition protocol (Perspectum, Oxford, UK), which involves 3 single 2D axial slice breath-held acquisitions that separately are sensitive to the fat content (proton density fat fraction, or PDFF), to T2\* (which is representative of liver iron content) and a MOLLI-T1 measurement (providing a measurement of tissue water), additionally a volumetric scan was used that covers the entire liver(S2).

Two dynamic cine MR acquisitions of the lung were acquired in the coronal plane with a 306.91 ms temporal resolution: one 40 s acquisition with the patient instructed to breathe normally and a second 30 s acquisition with the patient instructed to breathe deeply.

Kidney imaging used a single coronal view that was able to image both kidneys, imaging contrasts were MOLLI-T1, T2\* (for blood oxygen level assessment), and diffusion imaging that was acquired during free-breathing in 2minutes.

### **Image Analysis**

Cardiac MRI Analysis: Experienced cardiac MRI analysts used CVI42 (Cardiovascular Imaging Inc, Canada) to manually trace the end-diastolic and end-systolic phases in each of the short-axis views, following the standard UK BioBank evaluation approach as previously described(S3). This analysis yielded: For both the left and the right ventricle; End diastolic volume, End systolic volume, Stroke volume and Ejection Fraction. Additionally left ventricular muscle mass and wall thickness are determined from the function data. Cardiac T1 was determined for each of the 16 cardiac segments (of the AHA 17 segment model)(S4).

Liver Images were analysed by data analysts experienced at using the LiverMultiScan (Perspectum, Oxford, UK) software. This yielded global metrics in each liver of PDFF (proton density fat fraction), T2\*, and cT1 (cT1 is a measurement of T1 that has been corrected for the confounding effects of iron and standardised to 3 Tesla; it is elevated with disease).

Pancreas images were analysed in a similar manner to the above except the software used was not FDA-cleared and iron correction was not performed. The output T1 was standardized to 3 Tesla.

1  
2  
3 Lung cine imaging allowed the measurement of the area of the left and right lungs through the  
4 breathing cycle in the coronal plane, which used automated methods that were reviewed by image  
5 analysts. The periodicity of the area fluctuations was used to determine the respiratory rate. All analysis  
6 was performed in-house using MATLAB based tools. The method was validated by measuring the  
7 correlation between the change in area and the forced vital capacity, the latter being measured using  
8 spirometry.  
9

10  
11 Patient respiration was assessed by imaging a single 2D coronal slice of the lungs over 30 seconds  
12 using a dynamic cine MRI acquisition, during which the patient instructed to breathe deeply.  
13

14  
15 Kidney images were assessed using in-house tools to fit the parametric maps and allow trained analysts  
16 to make measurements. The T2\* maps were analysed by the Twelve Layer Concentric Object (TLCO)  
17 approach that generates a gradient of relaxation values, in the other evaluations the cortex and medulla  
18 were manually segmented using the MOLLI-T1 map or the b=0 (in the case of diffusion) to guide the  
19 boundary.  
20

21  
22 In all cases the volumetric assessments utilised an initial in-house developed machine-learning driven  
23 segmentation, and then a manual step that may be used to fine tune boundaries. This approach was  
24 also used in the body composition analysis, which for reasons of speed was performed only in a single  
25 slice (an axial view that passes through L3 of the spine) in this work.  
26  
27  
28  
29  
30  
31  
32  
33  
34  
35  
36  
37  
38  
39  
40  
41  
42  
43  
44  
45  
46  
47  
48  
49  
50  
51  
52  
53  
54  
55  
56  
57  
58  
59  
60

### Supplementary references

S1. Petersen SE, Matthews PM, Francis JM, Robson MD, Zemrak F, Boubertakh R, Young AA, Hudson S, Weale P, Garratt S, Collins R, Piechnik S, Neubauer S. UK Biobank's cardiovascular magnetic resonance protocol. *J Cardiovasc Magn Reson*. 2016 Feb 1;18:8.

S2. Banerjee R, Pavlides M, Tunnicliffe EM, Piechnik SK, Sarania N, Philips R, Collier JD, Booth JC, Schneider JE, Wang LM, Delaney DW, Fleming KA, Robson MD, Barnes E, Neubauer S. Multiparametric magnetic resonance for the non-invasive diagnosis of liver disease. *J Hepatol*. 2014 Jan;60(1):69-77. doi: 10.1016/j.jhep.2013.09.002.

S3. Petersen SE, Aung N, Sanghvi MM, Zemrak F, Fung K, Paiva JM, Francis JM, Khanji MY, Lukaschuk E, Lee AM, Carapella V, Kim YJ, Leeson P, Piechnik SK, Neubauer S. Reference ranges for cardiac structure and function using cardiovascular magnetic resonance (CMR) in Caucasians from the UK Biobank population cohort. *J Cardiovasc Magn Reson*. 2017 Feb 3;19(1):18.

S4. Cerqueira MD, Weissman NJ, Dilsizian V, Jacobs AK, Kaul S, Laskey WK, Pennell DJ, Rumberger JA, Ryan T, Verani MS; American Heart Association Writing Group on Myocardial Segmentation and Registration for Cardiac Imaging. Standardized myocardial segmentation and nomenclature for tomographic imaging of the heart. A statement for healthcare professionals from the Cardiac Imaging Committee of the Council on Clinical Cardiology of the American Heart Association. *Circulation*. 2002 Jan 29;105(4):539-42.

S5. Kawel-Boehm N, Maceira A, Valsangiacomo-Buechel ER, Vogel-Claussen J, Turkbey EB, Williams R, Plein S, Tee M, Eng J, Bluemke DA. Normal values for cardiovascular magnetic resonance in adults and children. *J Cardiovasc Magn Reson*. 2015 Apr 18;17(1):29.

S6. Ponikowski P, Voors AA, Anker SD, Bueno H, Cleland JGF, Coats AJS, Falk V, González-Juanatey JR, Harjola VP, Jankowska EA, Jessup M, Linde C, Nihoyannopoulos P, Parissis JT, Pieske B, Riley JP, Rosano GMC, Ruijlope LM, Ruschitzka F, Rutten FH, van der Meer P; ESC Scientific Document Group. 2016 ESC Guidelines for the diagnosis and treatment of acute and chronic heart failure: The Task Force for the diagnosis and treatment of acute and chronic heart failure of the European Society of Cardiology (ESC) Developed with the special contribution of the Heart Failure Association (HFA) of the ESC. *Eur Heart J*. 2016 Jul 14;37(27):2129-2200.

S7. Tsao CW, Lyass A, Larson MG, Cheng S, Lam CS, Aragam JR, Benjamin EJ, Vasan RS. Prognosis of adults with borderline left ventricular ejection fraction. *JACC Heart Fail*. 2016 Jun;4(6):502-10.

S8. Chalasani, Naga, et al. The diagnosis and management of nonalcoholic fatty liver disease: practice guidance from the American Association for the Study of Liver Diseases. *Hepatology* 67.1 (2018): 328-357

S9. Mojtahed A, Kelly C, Herlihy A, et al. Reference range of liver corrected T1 values in a population at low risk for fatty liver disease—a UK Biobank sub-study, with an appendix of interesting cases. *Abdominal Radiol* 2019; 44: 72–84.

S10. Jayaswal AN, Levick C, Selvaraj EA, et al. Prognostic value of multiparametric MRI, transient elastography and blood-based fibrosis markers in patients with chronic liver disease. *Liver Int* 2020; in press. DOI:doi:10.1111/liv.14625.

S11. Jayaswal ANA, Levick C, Selvaraj EA, Dennis A, Booth JC, Collier J, Cobbold J, Tunnicliffe EM, Kelly M, Barnes E, Neubauer S, Banerjee R, Pavlides M. Prognostic value of multiparametric magnetic

1  
2  
3 resonance imaging, transient elastography and blood-based fibrosis markers in patients with chronic  
4 liver disease. *Liver Int.* 2020 Jul 30. doi: 10.1111/liv.14625  
5

6 S12. Chouhan MD, Firmin L, Read S, Amin Z, Taylor SA. Quantitative pancreatic MRI: a pathology-  
7 based review. *Br J Radiol.* 2019 Jul;92(1099):20180941.  
8

9 S13. Harrington KA, Shukla-Dave A, Paudyal R, Do RKG. MRI of the Pancreas. *J Magn Reson Imaging.*  
10 2020 Apr 17. doi: 10.1002/jmri.27148.  
11

12 S14. Gillis KA, McComb C, Patel RK, et al. Non-contrast renal magnetic resonance imaging to assess  
13 perfusion and corticomedullary differentiation in health and chronic kidney disease. *Nephron* 2016;  
14 133: 183–92.  
15

16 S15. Peperhove M, Vo Chieu VD, Jang M-S, et al. Assessment of acute kidney injury with T1 mapping  
17 MRI following solid organ transplantation. *Eur Radiol* 2018; 28: 44–50.  
18

19 S16. Chow KU, Luxembourg B, Seifried E, Bonig H. Spleen size is significantly influenced by body height  
20 and sex: establishment of normal values for spleen size at us with a cohort of 1200 healthy  
21 individuals. *Radiology* 2015; 279: 306–13.  
22  
23  
24  
25  
26  
27  
28  
29  
30  
31  
32  
33  
34  
35  
36  
37  
38  
39  
40  
41  
42  
43  
44  
45  
46  
47  
48  
49  
50  
51  
52  
53  
54  
55  
56  
57  
58  
59  
60

**Supplementary results**

**Sub-group analysis**

Data from healthy participants (n=36) scanned on the 1.5T Siemens MRI scanner were compared to the sub-group of patients (N=121) scanned on the same MRI machine. Median global cardiac T1 was elevated in the patient group (979 ms versus 962ms, P=0.001). Lung fractional area difference, a measure of relaxed vital capacity, was significantly lower in the patient group (41% versus 48%, P<.001). Kidney inflammation (1148 vs 1084 ms, p <0.001) was significantly elevated in the patients as were markers of organ fat (liver 2.6% versus 2.1%, p=0.008; pancreas: 4.3% versus 2.5%, p<0.001) (**Figure S1**).

**Figure S1:** Box plots showing median and interquartile ranges for the healthy control group and the patient group for those scanned at 1.5T. Comparisons between groups were performed using two-sided Kolmogorov-Smirnov (KS) tests. Significance stars are \* P<.05; \*\* P<.01, \*\*\*P<.001.



**Figure S2:** Organ impairment in severe versus moderate post COVID syndrome (n=201)**Table S1:** Reference ranges for organ impairment, defined as a value that was greater than the mean plus 2 standard deviations of that from the control group for most; mean minus 2 standard deviations for left ventricular ejection fraction and lung fractional area difference for the 1.5T scans. For the 3T scans, this was the value as reported by Raman et al (2020).

|                                                   | 1.5T Reference range               | 3T reference range |
|---------------------------------------------------|------------------------------------|--------------------|
| Left ventricular ejection fraction (LVEF) (S4-S7) | ≤ 51.5%                            | ----               |
| Increased end-diastolic volume (S4-S7)            | ≥ 264ml in men<br>≥ 206ml in women | ----               |
| Myocarditis (S4-S7)                               | ≥ 1015 ms                          | ≥ 1238ms           |
| Deep breathing fractional area change*            | ≤ 31%                              | ----               |
| Liver volume (S8-S11)                             | ≤ 1.93L                            | ----               |
| Liver fat (S8-S11)                                | ≥ 4.8%                             | ----               |
| Liver inflammation (S8-S11)                       | ≥ 784 ms                           | ----               |
| Pancreatic fat (S12-S13)                          | ≥ 4.6%                             | ----               |
| Pancreatic inflammation (S12-13)                  | ≥ 803ms                            | ----               |
| Renal Cortical T1(S14-S15)                        | ≥ 1227ms                           | ≥ 1652ms           |
| Spleen volume(S16)                                | ≤ 0.35L                            | ----               |

\* Our lung imaging protocol captured 2D dynamic imaging of the lungs as the patient breathes. We delineated the lungs at maximum inspiration and again at maximum expiration and take the difference to give a proxy of 'vital capacity', which correlates well with forced vital capacity ( $r = 0.61$ ,  $P < .001$ ) from spirometry. Given the measure was associated with body size, we divided the difference in maximum inspiration and expiration by maximum inspiration to give a normalised 'lung ejection fraction'. In order to assess whether an individual's 'lung ejection fraction' was abnormal, it was measured in 39 controls, characterising a healthy normal range of the mean  $\pm$  2 standard deviations, with a lower score representing poorer lung health. 31% (0.31) was the lower limit for normal from our controls and therefore selected as the threshold for respiratory impairment.



**Table S2: Blood investigations in 201 low-risk individuals with post-COVID syndrome, sub-divided by those who were hospitalised versus those who were managed at home**

| Measurement                                                                                   | All         | Managed at home | Hospitalised | p-value |
|-----------------------------------------------------------------------------------------------|-------------|-----------------|--------------|---------|
| <b>Haemoglobin</b>                                                                            |             |                 |              |         |
| • Normal ( 130 - 170 g/L in men; 115 - 155 g/L in women )                                     | 170 (95.5%) | 140 (95.9%)     | 30 (93.8%)   | 0.575   |
| • Abnormal low ( < 130 g/L in men; < 115 g/L in women )                                       | 5 (2.8%)    | 4 (2.7%)        | 1 (3.1%)     |         |
| • Abnormal high ( > 170 g/L in men; > 155 g/L in women )                                      | 3 (1.7%)    | 2 (1.4%)        | 1 (3.1%)     |         |
| <b>Haematocrit (HCT)</b>                                                                      |             |                 |              |         |
| • Normal ( 0.37 - 0.5 in men; 0.33 - 0.45 in women )                                          | 173 (97.2%) | 142 (97.3%)     | 31 (96.9%)   | 0.386   |
| • Abnormal low ( < 0.37 in men; < 0.33 in women )                                             | 2 (1.1%)    | 1 (0.7%)        | 1 (3.1%)     |         |
| • Abnormal high ( > 0.5 in men; > 0.45 in women )                                             | 3 (1.7%)    | 3 (2.1%)        | 0 (0%)       |         |
| <b>Red cell count</b>                                                                         |             |                 |              |         |
| • Normal ( 4.4 - 5.8 x10 <sup>12</sup> /L in men; 3.95 - 5.15 x10 <sup>12</sup> /L in women ) | 170 (95.5%) | 140 (95.9%)     | 30 (93.8%)   | 0.287   |
| • Abnormal low ( < 4.4 x10 <sup>12</sup> /L in men; < 3.95 x10 <sup>12</sup> /L in women )    | 5 (2.8%)    | 3 (2.1%)        | 2 (6.2%)     |         |
| • Abnormal high ( > 5.8 x10 <sup>12</sup> /L in men; > 5.15 x10 <sup>12</sup> /L in women )   | 3 (1.7%)    | 3 (2.1%)        | 0 (0%)       |         |
| <b>Mean cell volume (MCV)</b>                                                                 |             |                 |              |         |
| • Normal ( 80 - 99 fL )                                                                       | 174 (97.8%) | 142 (97.3%)     | 32 (100%)    | 1       |
| • Abnormal low ( < 80 fL )                                                                    | 4 (2.2%)    | 4 (2.7%)        | 0 (0%)       |         |
| • Abnormal high ( > 99 fL )                                                                   | 0 (0%)      | 0 (0%)          | 0 (0%)       |         |
| <b>Mean corpuscular haemoglobin (MCH)</b>                                                     |             |                 |              |         |
| • Normal ( 26 - 33.5 pg )                                                                     | 174 (97.8%) | 143 (97.9%)     | 31 (96.9%)   | 0.249   |
| • Abnormal low ( < 26 pg )                                                                    | 3 (1.7%)    | 3 (2.1%)        | 0 (0%)       |         |
| • Abnormal high ( > 33.5 pg )                                                                 | 1 (0.6%)    | 0 (0%)          | 1 (3.1%)     |         |
| <b>Mean corpuscular haemoglobin concentration (MCHC)</b>                                      |             |                 |              |         |
| • Normal ( 300 - 350 g/L )                                                                    | 135 (75.8%) | 109 (74.7%)     | 26 (81.2%)   | 0.501   |
| • Abnormal low ( < 300 g/L )                                                                  | 0 (0%)      | 0 (0%)          | 0 (0%)       |         |
| • Abnormal high ( > 350 g/L )                                                                 | 43 (24.2%)  | 37 (25.3%)      | 6 (18.8%)    |         |
| <b>Red cell distribution width (RDW)</b>                                                      |             |                 |              |         |
| • Normal ( 11.5 - 15 )                                                                        | 161 (91%)   | 129 (89%)       | 32 (100%)    | 0.218   |
| • Abnormal low ( < 11.5 )                                                                     | 10 (5.6%)   | 10 (6.9%)       | 0 (0%)       |         |
| • Abnormal high ( > 15 )                                                                      | 6 (3.4%)    | 6 (4.1%)        | 0 (0%)       |         |
| <b>Platelet count</b>                                                                         |             |                 |              |         |
| • Normal ( 150 - 400 x10 <sup>9</sup> /L )                                                    | 166 (93.3%) | 138 (94.5%)     | 28 (87.5%)   | 0.152   |
| • Abnormal low ( < 150 x10 <sup>9</sup> /L )                                                  | 2 (1.1%)    | 2 (1.4%)        | 0 (0%)       |         |
| • Abnormal high ( > 400 x10 <sup>9</sup> /L )                                                 | 10 (5.6%)   | 6 (4.1%)        | 4 (12.5%)    |         |
| <b>Mean platelet volume (MPV)</b>                                                             |             |                 |              |         |
| • Normal ( 7 - 13 fL )                                                                        | 177 (99.4%) | 145 (99.3%)     | 32 (100%)    | 1       |
| • Abnormal low ( < 7 fL )                                                                     | 0 (0%)      | 0 (0%)          | 0 (0%)       |         |
| • Abnormal high ( > 13 fL )                                                                   | 1 (0.6%)    | 1 (0.7%)        | 0 (0%)       |         |
| <b>White cell count</b>                                                                       |             |                 |              |         |

|                                                |             |             |            |       |
|------------------------------------------------|-------------|-------------|------------|-------|
| • Normal ( 3 - 10 x10 <sup>9</sup> /L )        | 172 (96.6%) | 140 (95.9%) | 32 (100%)  | 0.593 |
| • Abnormal low ( < 3 x10 <sup>9</sup> /L )     | 0 (0%)      | 0 (0%)      | 0 (0%)     |       |
| • Abnormal high ( > 10 x10 <sup>9</sup> /L )   | 6 (3.4%)    | 6 (4.1%)    | 0 (0%)     |       |
| <b>Neutrophils</b>                             |             |             |            |       |
| • Normal ( 2 - 7.5 x10 <sup>9</sup> /L )       | 163 (91.6%) | 133 (91.1%) | 30 (93.8%) | 1     |
| • Abnormal low ( < 2 x10 <sup>9</sup> /L )     | 12 (6.7%)   | 10 (6.8%)   | 2 (6.2%)   |       |
| • Abnormal high ( > 7.5 x10 <sup>9</sup> /L )  | 3 (1.7%)    | 3 (2.1%)    | 0 (0%)     |       |
| <b>Lymphocytes</b>                             |             |             |            |       |
| • Normal ( 1.2 - 3.65 x10 <sup>9</sup> /L )    | 161 (90.4%) | 130 (89%)   | 31 (96.9%) | 0.316 |
| • Abnormal low ( < 1.2 x10 <sup>9</sup> /L )   | 17 (9.6%)   | 16 (11%)    | 1 (3.1%)   |       |
| • Abnormal high ( > 3.65 x10 <sup>9</sup> /L ) | 0 (0%)      | 0 (0%)      | 0 (0%)     |       |
| <b>Monocytes</b>                               |             |             |            |       |
| • Normal ( 0.2 - 1 x10 <sup>9</sup> /L )       | 176 (98.9%) | 144 (98.6%) | 32 (100%)  | 1     |
| • Abnormal low ( < 0.2 x10 <sup>9</sup> /L )   | 1 (0.6%)    | 1 (0.7%)    | 0 (0%)     |       |
| • Abnormal high ( > 1 x10 <sup>9</sup> /L )    | 1 (0.6%)    | 1 (0.7%)    | 0 (0%)     |       |
| <b>Eosinophils</b>                             |             |             |            |       |
| • Normal ( 0 - 0.4 x10 <sup>9</sup> /L )       | 172 (96.6%) | 141 (96.6%) | 31 (96.9%) | 1     |
| • Abnormal low ( < 0 x10 <sup>9</sup> /L )     | 0 (0%)      | 0 (0%)      | 0 (0%)     |       |
| • Abnormal high ( > 0.4 x10 <sup>9</sup> /L )  | 6 (3.4%)    | 5 (3.4%)    | 1 (3.1%)   |       |
| <b>Basophils</b>                               |             |             |            |       |
| • Normal ( 0 - 0.1 x10 <sup>9</sup> /L )       | 178 (100%)  | 146 (100%)  | 32 (100%)  | N/A   |
| • Abnormal low ( < 0 x10 <sup>9</sup> /L )     | 0 (0%)      | 0 (0%)      | 0 (0%)     |       |
| • Abnormal high ( > 0.1 x10 <sup>9</sup> /L )  | 0 (0%)      | 0 (0%)      | 0 (0%)     |       |
| <b>Erythrocyte sedimentation rate (ESR)</b>    |             |             |            |       |
| • Normal ( 1 - 20 mm/hr )                      | 164 (91.1%) | 136 (91.9%) | 28 (87.5%) | 0.491 |
| • Abnormal low ( < 1 mm/hr )                   | 0 (0%)      | 0 (0%)      | 0 (0%)     |       |
| • Abnormal high ( > 20 mm/hr )                 | 16 (8.9%)   | 12 (8.1%)   | 4 (12.5%)  |       |
| <b>Sodium</b>                                  |             |             |            |       |
| • Normal ( 135 - 145 mmol/L )                  | 173 (97.2%) | 141 (96.6%) | 32 (100%)  | 1     |
| • Abnormal low ( < 135 mmol/L )                | 4 (2.2%)    | 4 (2.7%)    | 0 (0%)     |       |
| • Abnormal high ( > 145 mmol/L )               | 1 (0.6%)    | 1 (0.7%)    | 0 (0%)     |       |
| <b>Potassium</b>                               |             |             |            |       |
| • Normal ( 3.5 - 5.1 mmol/L )                  | 108 (62.1%) | 87 (61.3%)  | 21 (65.6%) | 0.692 |
| • Abnormal low ( < 3.5 mmol/L )                | 0 (0%)      | 0 (0%)      | 0 (0%)     |       |
| • Abnormal high ( > 5.1 mmol/L )               | 66 (37.9%)  | 55 (38.7%)  | 11 (34.4%) |       |
| <b>Chloride</b>                                |             |             |            |       |
| • Normal ( 98 - 107 mmol/L )                   | 171 (96.1%) | 139 (95.2%) | 32 (100%)  | 1     |
| • Abnormal low ( < 98 mmol/L )                 | 4 (2.2%)    | 4 (2.7%)    | 0 (0%)     |       |
| • Abnormal high ( > 107 mmol/L )               | 3 (1.7%)    | 3 (2.1%)    | 0 (0%)     |       |
| <b>Bicarbonate</b>                             |             |             |            |       |
| • Normal ( 22 - 29 mmol/L )                    | 150 (84.3%) | 125 (85.6%) | 25 (78.1%) | 0.169 |
| • Abnormal low ( < 22 mmol/L )                 | 18 (10.1%)  | 15 (10.3%)  | 3 (9.4%)   |       |
| • Abnormal high ( > 29 mmol/L )                | 10 (5.6%)   | 6 (4.1%)    | 4 (12.5%)  |       |
| <b>Urea</b>                                    |             |             |            |       |

|                                                               |             |             |            |       |
|---------------------------------------------------------------|-------------|-------------|------------|-------|
| • Normal ( 1.7 - 8.3 mmol/L )                                 | 178 (100%)  | 146 (100%)  | 32 (100%)  | N/A   |
| • Abnormal low ( < 1.7 mmol/L )                               | 0 (0%)      | 0 (0%)      | 0 (0%)     |       |
| • Abnormal high ( > 8.3 mmol/L )                              | 0 (0%)      | 0 (0%)      | 0 (0%)     |       |
| <b>Creatinine</b>                                             |             |             |            |       |
| • Normal ( 66 - 112 umol/L in men; 49 - 92 umol/L in women )  | 161 (90.4%) | 134 (91.8%) | 27 (84.4%) | 0.219 |
| • Abnormal low ( < 66 umol/L in men; < 49 umol/L in women )   | 12 (6.7%)   | 9 (6.2%)    | 3 (9.4%)   |       |
| • Abnormal high ( > 112 umol/L in men; > 92 umol/L in women ) | 5 (2.8%)    | 3 (2.1%)    | 2 (6.2%)   |       |
| <b>Bilirubin</b>                                              |             |             |            |       |
| • Normal ( 0 - 20 umol/L )                                    | 175 (98.3%) | 144 (98.6%) | 31 (96.9%) | 0.45  |
| • Abnormal low ( < 0 umol/L )                                 | 0 (0%)      | 0 (0%)      | 0 (0%)     |       |
| • Abnormal high ( > 20 umol/L )                               | 3 (1.7%)    | 2 (1.4%)    | 1 (3.1%)   |       |
| <b>Alkaline phosphatase</b>                                   |             |             |            |       |
| • Normal ( 40 - 129 IU/L in men; 35 - 104 IU/L in women )     | 168 (94.4%) | 137 (93.8%) | 31 (96.9%) | 0.161 |
| • Abnormal low ( < 40 IU/L in men; < 35 IU/L in women )       | 8 (4.5%)    | 8 (5.5%)    | 0 (0%)     |       |
| • Abnormal high ( > 129 IU/L in men; > 104 IU/L in women )    | 2 (1.1%)    | 1 (0.7%)    | 1 (3.1%)   |       |
| <b>Aspartate transferase</b>                                  |             |             |            |       |
| • Normal ( 0 - 37 IU/L in men; 0 - 31 IU/L in women )         | 162 (93.1%) | 133 (93.7%) | 29 (90.6%) | 0.464 |
| • Abnormal low ( < 0 IU/L in men; < 0 IU/L in women )         | 0 (0%)      | 0 (0%)      | 0 (0%)     |       |
| • Abnormal high ( > 37 IU/L in men; > 31 IU/L in women )      | 12 (6.9%)   | 9 (6.3%)    | 3 (9.4%)   |       |
| <b>Alanine transferase</b>                                    |             |             |            |       |
| • Normal ( 10 - 50 IU/L in men; 10 - 35 IU/L in women )       | 151 (84.8%) | 125 (85.6%) | 26 (81.2%) | 0.603 |
| • Abnormal low ( < 10 IU/L in men; < 10 IU/L in women )       | 2 (1.1%)    | 2 (1.4%)    | 0 (0%)     |       |
| • Abnormal high ( > 50 IU/L in men; > 35 IU/L in women )      | 25 (14%)    | 19 (13%)    | 6 (18.8%)  |       |
| <b>Lactate dehydrogenase (LDH)</b>                            |             |             |            |       |
| • Normal ( 135 - 225 IU/L in men; 135 - 214 IU/L in women )   | 142 (80.7%) | 118 (81.9%) | 24 (75%)   | 0.236 |
| • Abnormal low ( < 135 IU/L in men; < 135 IU/L in women )     | 5 (2.8%)    | 5 (3.5%)    | 0 (0%)     |       |
| • Abnormal high ( > 225 IU/L in men; > 214 IU/L in women )    | 29 (16.5%)  | 21 (14.6%)  | 8 (25%)    |       |
| <b>Creatinine kinase (CK)</b>                                 |             |             |            |       |
| • Normal ( 38 - 204 IU/L in men; 26 - 140 IU/L in women )     | 163 (91.6%) | 132 (90.4%) | 31 (96.9%) | 0.642 |
| • Abnormal low ( < 38 IU/L in men; < 26 IU/L in women )       | 2 (1.1%)    | 2 (1.4%)    | 0 (0%)     |       |
| • Abnormal high ( > 204 IU/L in men; > 140 IU/L in women )    | 13 (7.3%)   | 12 (8.2%)   | 1 (3.1%)   |       |
| <b>Gamma glutamyl transferase</b>                             |             |             |            |       |
| • Normal ( 10 - 71 IU/L in men; 6 - 42 IU/L in women )        | 165 (92.7%) | 136 (93.2%) | 29 (90.6%) | 0.461 |
| • Abnormal low ( < 10 IU/L in men; < 6 IU/L in women )        | 4 (2.2%)    | 4 (2.7%)    | 0 (0%)     |       |
| • Abnormal high ( > 71 IU/L in men; > 42 IU/L in women )      | 9 (5.1%)    | 6 (4.1%)    | 3 (9.4%)   |       |
| <b>Total protein</b>                                          |             |             |            |       |
| • Normal ( 63 - 83 g/L )                                      | 173 (97.2%) | 143 (97.9%) | 30 (93.8%) | 0.22  |
| • Abnormal low ( < 63 g/L )                                   | 3 (1.7%)    | 2 (1.4%)    | 1 (3.1%)   |       |
| • Abnormal high ( > 83 g/L )                                  | 2 (1.1%)    | 1 (0.7%)    | 1 (3.1%)   |       |
| <b>Albumin</b>                                                |             |             |            |       |
| • Normal ( 34 - 50 g/L )                                      | 167 (93.8%) | 136 (93.2%) | 31 (96.9%) | 0.692 |
| • Abnormal low ( < 34 g/L )                                   | 0 (0%)      | 0 (0%)      | 0 (0%)     |       |
| • Abnormal high ( > 50 g/L )                                  | 11 (6.2%)   | 10 (6.8%)   | 1 (3.1%)   |       |
| <b>Globulin</b>                                               |             |             |            |       |

|                                                                  |             |             |            |       |
|------------------------------------------------------------------|-------------|-------------|------------|-------|
| • Normal ( 19 - 35 g/L )                                         | 173 (97.2%) | 142 (97.3%) | 31 (96.9%) | 0.386 |
| • Abnormal low ( < 19 g/L )                                      | 3 (1.7%)    | 3 (2.1%)    | 0 (0%)     |       |
| • Abnormal high ( > 35 g/L )                                     | 2 (1.1%)    | 1 (0.7%)    | 1 (3.1%)   |       |
| <b>Calcium</b>                                                   |             |             |            |       |
| • Normal ( 2.2 - 2.6 mmol/L )                                    | 172 (96.6%) | 141 (96.6%) | 31 (96.9%) | 0.43  |
| • Abnormal low ( < 2.2 mmol/L )                                  | 2 (1.1%)    | 1 (0.7%)    | 1 (3.1%)   |       |
| • Abnormal high ( > 2.6 mmol/L )                                 | 4 (2.2%)    | 4 (2.7%)    | 0 (0%)     |       |
| <b>Magnesium</b>                                                 |             |             |            |       |
| • Normal ( 0.6 - 1 mmol/L )                                      | 176 (98.9%) | 144 (98.6%) | 32 (100%)  | 1     |
| • Abnormal low ( < 0.6 mmol/L )                                  | 1 (0.6%)    | 1 (0.7%)    | 0 (0%)     |       |
| • Abnormal high ( > 1 mmol/L )                                   | 1 (0.6%)    | 1 (0.7%)    | 0 (0%)     |       |
| <b>Phosphate</b>                                                 |             |             |            |       |
| • Normal ( 0.87 - 1.45 mmol/L )                                  | 150 (84.3%) | 121 (82.9%) | 29 (90.6%) | 0.518 |
| • Abnormal low ( < 0.87 mmol/L )                                 | 23 (12.9%)  | 21 (14.4%)  | 2 (6.2%)   |       |
| • Abnormal high ( > 1.45 mmol/L )                                | 5 (2.8%)    | 4 (2.7%)    | 1 (3.1%)   |       |
| <b>Uric acid</b>                                                 |             |             |            |       |
| • Normal ( 266 - 474 umol/L in men; 175 - 363 umol/L in women )  | 148 (83.1%) | 124 (84.9%) | 24 (75%)   | 0.067 |
| • Abnormal low ( < 266 umol/L in men; < 175 umol/L in women )    | 19 (10.7%)  | 16 (11%)    | 3 (9.4%)   |       |
| • Abnormal high ( > 474 umol/L in men; > 363 umol/L in women )   | 11 (6.2%)   | 6 (4.1%)    | 5 (15.6%)  |       |
| <b>Triglycerides</b>                                             |             |             |            |       |
| • Normal ( < 2.3 mmol/L )                                        | 10 (100%)   | 8 (100%)    | 2 (100%)   | N/A   |
| • Abnormal high ( > 2.3 mmol/L )                                 | 0 (0%)      | 0 (0%)      | 0 (0%)     |       |
| <b>Fasting triglycerides</b>                                     |             |             |            |       |
| • Normal ( < 2.3 mmol/L )                                        | 149 (88.7%) | 128 (92.8%) | 21 (70%)   | 0.002 |
| • Abnormal high ( > 2.3 mmol/L )                                 | 19 (11.3%)  | 10 (7.2%)   | 9 (30%)    |       |
| <b>Cholesterol</b>                                               |             |             |            |       |
| • Normal ( < 5 mmol/L )                                          | 4 (40%)     | 3 (37.5%)   | 1 (50%)    | 1     |
| • Abnormal high ( > 5 mmol/L )                                   | 6 (60%)     | 5 (62.5%)   | 1 (50%)    |       |
| <b>Fasting cholesterol</b>                                       |             |             |            |       |
| • Normal ( < 5 mmol/L )                                          | 98 (58.3%)  | 86 (62.3%)  | 12 (40%)   | 0.04  |
| • Abnormal high ( > 5 mmol/L )                                   | 70 (41.7%)  | 52 (37.7%)  | 18 (60%)   |       |
| <b>HDL cholesterol</b>                                           |             |             |            |       |
| • Normal ( 0.9 - 1.5 mmol/L in men; 1.2 - 1.7 mmol/L in women )  | 106 (59.6%) | 87 (59.6%)  | 19 (59.4%) | 0.075 |
| • Abnormal low ( < 0.9 mmol/L in men; < 1.2 mmol/L in women )    | 16 (9%)     | 10 (6.8%)   | 6 (18.8%)  |       |
| • Abnormal high ( > 1.5 mmol/L in men; > 1.7 mmol/L in women )   | 56 (31.5%)  | 49 (33.6%)  | 7 (21.9%)  |       |
| <b>LDL cholesterol</b>                                           |             |             |            |       |
| • Normal ( < 3 mmol/L )                                          | 113 (64.9%) | 100 (69.4%) | 13 (43.3%) | 0.011 |
| • Abnormal high ( > 3 mmol/L )                                   | 61 (35.1%)  | 44 (30.6%)  | 17 (56.7%) |       |
| <b>Iron</b>                                                      |             |             |            |       |
| • Normal ( 10.6 - 28.3 umol/L in men; 6.6 - 26 umol/L in women ) | 164 (92.1%) | 135 (92.5%) | 29 (90.6%) | 0.22  |
| • Abnormal low ( < 10.6 umol/L in men; < 6.6 umol/L in women )   | 4 (2.2%)    | 2 (1.4%)    | 2 (6.2%)   |       |

|                                                                |             |             |            |       |
|----------------------------------------------------------------|-------------|-------------|------------|-------|
| • Abnormal high ( > 28.3 umol/L in men; > 26 umol/L in women ) | 10 (5.6%)   | 9 (6.2%)    | 1 (3.1%)   |       |
| <b>Total iron binding capacity (TIBC)</b>                      |             |             |            |       |
| • Normal ( 41 - 77 umol/L )                                    | 172 (97.2%) | 141 (97.2%) | 31 (96.9%) | 1     |
| • Abnormal low ( < 41 umol/L )                                 | 0 (0%)      | 0 (0%)      | 0 (0%)     |       |
| • Abnormal high ( > 77 umol/L )                                | 5 (2.8%)    | 4 (2.8%)    | 1 (3.1%)   |       |
| <b>Transferrin saturation</b>                                  |             |             |            |       |
| • Normal ( 20 - 55 % )                                         | 139 (78.5%) | 120 (82.8%) | 19 (59.4%) | 0.011 |
| • Abnormal low ( < 20 % )                                      | 34 (19.2%)  | 22 (15.2%)  | 12 (37.5%) |       |
| • Abnormal high ( > 55 % )                                     | 4 (2.3%)    | 3 (2.1%)    | 1 (3.1%)   |       |
| <b>High sensitivity CRP</b>                                    |             |             |            |       |
| • Normal ( 0 - 5 mg/L )                                        | 146 (92.4%) | 124 (93.9%) | 22 (84.6%) | 0.112 |
| • Abnormal low ( < 0 mg/L )                                    | 0 (0%)      | 0 (0%)      | 0 (0%)     |       |
| • Abnormal high ( > 5 mg/L )                                   | 12 (7.6%)   | 8 (6.1%)    | 4 (15.4%)  |       |

**Table S3: Blood investigations in 201 low-risk individuals sub-divided by those with severe or moderate post-COVID syndrome (PCS)**

| Measurement                                                                                   | All         | Moderate PCS | Severe PCS  | p-value |
|-----------------------------------------------------------------------------------------------|-------------|--------------|-------------|---------|
| <b>Haemoglobin</b>                                                                            |             |              |             |         |
| • Normal ( 130 - 170 g/L in men; 115 - 155 g/L in women )                                     | 166 (96%)   | 62 (96.9%)   | 104 (95.4%) | 1       |
| • Abnormal low ( < 130 g/L in men; < 115 g/L in women )                                       | 4 (2.3%)    | 1 (1.6%)     | 3 (2.8%)    |         |
| • Abnormal high ( > 170 g/L in men; > 155 g/L in women )                                      | 3 (1.7%)    | 1 (1.6%)     | 2 (1.8%)    |         |
| <b>Haematocrit (HCT)</b>                                                                      |             |              |             |         |
| • Normal ( 0.37 - 0.5 in men; 0.33 - 0.45 in women )                                          | 168 (97.1%) | 64 (100%)    | 104 (95.4%) | 0.274   |
| • Abnormal low ( < 0.37 in men; < 0.33 in women )                                             | 2 (1.2%)    | 0 (0%)       | 2 (1.8%)    |         |
| • Abnormal high ( > 0.5 in men; > 0.45 in women )                                             | 3 (1.7%)    | 0 (0%)       | 3 (2.8%)    |         |
| <b>Red cell count</b>                                                                         |             |              |             |         |
| • Normal ( 4.4 - 5.8 x10 <sup>12</sup> /L in men; 3.95 - 5.15 x10 <sup>12</sup> /L in women ) | 167 (96.5%) | 61 (95.3%)   | 106 (97.2%) | 0.825   |
| • Abnormal low ( < 4.4 x10 <sup>12</sup> /L in men; < 3.95 x10 <sup>12</sup> /L in women )    | 4 (2.3%)    | 2 (3.1%)     | 2 (1.8%)    |         |
| • Abnormal high ( > 5.8 x10 <sup>12</sup> /L in men; > 5.15 x10 <sup>12</sup> /L in women )   | 2 (1.2%)    | 1 (1.6%)     | 1 (0.9%)    |         |
| <b>Mean cell volume (MCV)</b>                                                                 |             |              |             |         |
| • Normal ( 80 - 99 fL )                                                                       | 170 (98.3%) | 62 (96.9%)   | 108 (99.1%) | 0.556   |
| • Abnormal low ( < 80 fL )                                                                    | 3 (1.7%)    | 2 (3.1%)     | 1 (0.9%)    |         |
| • Abnormal high ( > 99 fL )                                                                   | 0 (0%)      | 0 (0%)       | 0 (0%)      |         |
| <b>Mean corpuscular haemoglobin (MCH)</b>                                                     |             |              |             |         |
| • Normal ( 26 - 33.5 pg )                                                                     | 170 (98.3%) | 61 (95.3%)   | 109 (100%)  | 0.049   |
| • Abnormal low ( < 26 pg )                                                                    | 2 (1.2%)    | 2 (3.1%)     | 0 (0%)      |         |
| • Abnormal high ( > 33.5 pg )                                                                 | 1 (0.6%)    | 1 (1.6%)     | 0 (0%)      |         |
| <b>Mean corpuscular haemoglobin concentration (MCHC)</b>                                      |             |              |             |         |
| • Normal ( 300 - 350 g/L )                                                                    | 131 (75.7%) | 53 (82.8%)   | 78 (71.6%)  | 0.103   |
| • Abnormal low ( < 300 g/L )                                                                  | 0 (0%)      | 0 (0%)       | 0 (0%)      |         |
| • Abnormal high ( > 350 g/L )                                                                 | 42 (24.3%)  | 11 (17.2%)   | 31 (28.4%)  |         |
| <b>Red cell distribution width (RDW)</b>                                                      |             |              |             |         |
| • Normal ( 11.5 - 15 )                                                                        | 157 (91.3%) | 59 (92.2%)   | 98 (90.7%)  | 0.339   |
| • Abnormal low ( < 11.5 )                                                                     | 10 (5.8%)   | 2 (3.1%)     | 8 (7.4%)    |         |
| • Abnormal high ( > 15 )                                                                      | 5 (2.9%)    | 3 (4.7%)     | 2 (1.9%)    |         |
| <b>Platelet count</b>                                                                         |             |              |             |         |
| • Normal ( 150 - 400 x10 <sup>9</sup> /L )                                                    | 161 (93.1%) | 59 (92.2%)   | 102 (93.6%) | 0.417   |
| • Abnormal low ( < 150 x10 <sup>9</sup> /L )                                                  | 2 (1.2%)    | 0 (0%)       | 2 (1.8%)    |         |
| • Abnormal high ( > 400 x10 <sup>9</sup> /L )                                                 | 10 (5.8%)   | 5 (7.8%)     | 5 (4.6%)    |         |
| <b>Mean platelet volume (MPV)</b>                                                             |             |              |             |         |
| • Normal ( 7 - 13 fL )                                                                        | 172 (99.4%) | 64 (100%)    | 108 (99.1%) | 1       |
| • Abnormal low ( < 7 fL )                                                                     | 0 (0%)      | 0 (0%)       | 0 (0%)      |         |

|                                              |             |            |             |       |
|----------------------------------------------|-------------|------------|-------------|-------|
| • Abnormal high (> 13 fL)                    | 1 (0.6%)    | 0 (0%)     | 1 (0.9%)    |       |
| <b>White cell count</b>                      |             |            |             |       |
| • Normal (3 - 10 x10 <sup>9</sup> /L)        | 167 (96.5%) | 61 (95.3%) | 106 (97.2%) | 0.671 |
| • Abnormal low (< 3 x10 <sup>9</sup> /L)     | 0 (0%)      | 0 (0%)     | 0 (0%)      |       |
| • Abnormal high (> 10 x10 <sup>9</sup> /L)   | 6 (3.5%)    | 3 (4.7%)   | 3 (2.8%)    |       |
| <b>Neutrophils</b>                           |             |            |             |       |
| • Normal (2 - 7.5 x10 <sup>9</sup> /L)       | 159 (91.9%) | 57 (89.1%) | 102 (93.6%) | 0.468 |
| • Abnormal low (< 2 x10 <sup>9</sup> /L)     | 11 (6.4%)   | 5 (7.8%)   | 6 (5.5%)    |       |
| • Abnormal high (> 7.5 x10 <sup>9</sup> /L)  | 3 (1.7%)    | 2 (3.1%)   | 1 (0.9%)    |       |
| <b>Lymphocytes</b>                           |             |            |             |       |
| • Normal (1.2 - 3.65 x10 <sup>9</sup> /L)    | 156 (90.2%) | 56 (87.5%) | 100 (91.7%) | 0.43  |
| • Abnormal low (< 1.2 x10 <sup>9</sup> /L)   | 17 (9.8%)   | 8 (12.5%)  | 9 (8.3%)    |       |
| • Abnormal high (> 3.65 x10 <sup>9</sup> /L) | 0 (0%)      | 0 (0%)     | 0 (0%)      |       |
| <b>Monocytes</b>                             |             |            |             |       |
| • Normal (0.2 - 1 x10 <sup>9</sup> /L)       | 171 (98.8%) | 63 (98.4%) | 108 (99.1%) | 0.604 |
| • Abnormal low (< 0.2 x10 <sup>9</sup> /L)   | 1 (0.6%)    | 0 (0%)     | 1 (0.9%)    |       |
| • Abnormal high (> 1 x10 <sup>9</sup> /L)    | 1 (0.6%)    | 1 (1.6%)   | 0 (0%)      |       |
| <b>Eosinophils</b>                           |             |            |             |       |
| • Normal (0 - 0.4 x10 <sup>9</sup> /L)       | 167 (96.5%) | 63 (98.4%) | 104 (95.4%) | 0.415 |
| • Abnormal low (< 0 x10 <sup>9</sup> /L)     | 0 (0%)      | 0 (0%)     | 0 (0%)      |       |
| • Abnormal high (> 0.4 x10 <sup>9</sup> /L)  | 6 (3.5%)    | 1 (1.6%)   | 5 (4.6%)    |       |
| <b>Basophils</b>                             |             |            |             |       |
| • Normal (0 - 0.1 x10 <sup>9</sup> /L)       | 173 (100%)  | 64 (100%)  | 109 (100%)  | N/A   |
| • Abnormal low (< 0 x10 <sup>9</sup> /L)     | 0 (0%)      | 0 (0%)     | 0 (0%)      |       |
| • Abnormal high (> 0.1 x10 <sup>9</sup> /L)  | 0 (0%)      | 0 (0%)     | 0 (0%)      |       |
| <b>Erythrocyte sedimentation rate (ESR)</b>  |             |            |             |       |
| • Normal (1 - 20 mm/hr)                      | 160 (91.4%) | 62 (93.9%) | 98 (89.9%)  | 0.416 |
| • Abnormal low (< 1 mm/hr)                   | 0 (0%)      | 0 (0%)     | 0 (0%)      |       |
| • Abnormal high (> 20 mm/hr)                 | 15 (8.6%)   | 4 (6.1%)   | 11 (10.1%)  |       |
| <b>Sodium</b>                                |             |            |             |       |
| • Normal (135 - 145 mmol/L)                  | 168 (97.1%) | 63 (98.4%) | 105 (96.3%) | 1     |
| • Abnormal low (< 135 mmol/L)                | 4 (2.3%)    | 1 (1.6%)   | 3 (2.8%)    |       |
| • Abnormal high (> 145 mmol/L)               | 1 (0.6%)    | 0 (0%)     | 1 (0.9%)    |       |
| <b>Potassium</b>                             |             |            |             |       |
| • Normal (3.5 - 5.1 mmol/L)                  | 105 (62.1%) | 35 (56.5%) | 70 (65.4%)  | 0.255 |
| • Abnormal low (< 3.5 mmol/L)                | 0 (0%)      | 0 (0%)     | 0 (0%)      |       |
| • Abnormal high (> 5.1 mmol/L)               | 64 (37.9%)  | 27 (43.5%) | 37 (34.6%)  |       |
| <b>Chloride</b>                              |             |            |             |       |
| • Normal (98 - 107 mmol/L)                   | 166 (96%)   | 62 (96.9%) | 104 (95.4%) | 1     |
| • Abnormal low (< 98 mmol/L)                 | 4 (2.3%)    | 1 (1.6%)   | 3 (2.8%)    |       |
| • Abnormal high (> 107 mmol/L)               | 3 (1.7%)    | 1 (1.6%)   | 2 (1.8%)    |       |

|                                                               |             |            |             |       |
|---------------------------------------------------------------|-------------|------------|-------------|-------|
| <b>Bicarbonate</b>                                            |             |            |             |       |
| • Normal ( 22 - 29 mmol/L )                                   | 147 (85%)   | 55 (85.9%) | 92 (84.4%)  | 0.946 |
| • Abnormal low ( < 22 mmol/L )                                | 16 (9.2%)   | 6 (9.4%)   | 10 (9.2%)   |       |
| • Abnormal high ( > 29 mmol/L )                               | 10 (5.8%)   | 3 (4.7%)   | 7 (6.4%)    |       |
| <b>Urea</b>                                                   |             |            |             |       |
| • Normal ( 1.7 - 8.3 mmol/L )                                 | 173 (100%)  | 64 (100%)  | 109 (100%)  | N/A   |
| • Abnormal low ( < 1.7 mmol/L )                               | 0 (0%)      | 0 (0%)     | 0 (0%)      |       |
| • Abnormal high ( > 8.3 mmol/L )                              | 0 (0%)      | 0 (0%)     | 0 (0%)      |       |
| <b>Creatinine</b>                                             |             |            |             |       |
| • Normal ( 66 - 112 umol/L in men; 49 - 92 umol/L in women )  | 156 (90.2%) | 59 (92.2%) | 97 (89%)    | 0.705 |
| • Abnormal low ( < 66 umol/L in men; < 49 umol/L in women )   | 12 (6.9%)   | 3 (4.7%)   | 9 (8.3%)    |       |
| • Abnormal high ( > 112 umol/L in men; > 92 umol/L in women ) | 5 (2.9%)    | 2 (3.1%)   | 3 (2.8%)    |       |
| <b>Bilirubin</b>                                              |             |            |             |       |
| • Normal ( 0 - 20 umol/L )                                    | 170 (98.3%) | 63 (98.4%) | 107 (98.2%) | 1     |
| • Abnormal low ( < 0 umol/L )                                 | 0 (0%)      | 0 (0%)     | 0 (0%)      |       |
| • Abnormal high ( > 20 umol/L )                               | 3 (1.7%)    | 1 (1.6%)   | 2 (1.8%)    |       |
| <b>Alkaline phosphatase</b>                                   |             |            |             |       |
| • Normal ( 40 - 129 IU/L in men; 35 - 104 IU/L in women )     | 164 (94.8%) | 59 (92.2%) | 105 (96.3%) | 0.185 |
| • Abnormal low ( < 40 IU/L in men; < 35 IU/L in women )       | 7 (4%)      | 3 (4.7%)   | 4 (3.7%)    |       |
| • Abnormal high ( > 129 IU/L in men; > 104 IU/L in women )    | 2 (1.2%)    | 2 (3.1%)   | 0 (0%)      |       |
| <b>Aspartate transferase</b>                                  |             |            |             |       |
| • Normal ( 0 - 37 IU/L in men; 0 - 31 IU/L in women )         | 157 (92.9%) | 59 (93.7%) | 98 (92.5%)  | 1     |
| • Abnormal low ( < 0 IU/L in men; < 0 IU/L in women )         | 0 (0%)      | 0 (0%)     | 0 (0%)      |       |
| • Abnormal high ( > 37 IU/L in men; > 31 IU/L in women )      | 12 (7.1%)   | 4 (6.3%)   | 8 (7.5%)    |       |
| <b>Alanine transferase</b>                                    |             |            |             |       |
| • Normal ( 10 - 50 IU/L in men; 10 - 35 IU/L in women )       | 146 (84.4%) | 56 (87.5%) | 90 (82.6%)  | 0.512 |
| • Abnormal low ( < 10 IU/L in men; < 10 IU/L in women )       | 2 (1.2%)    | 1 (1.6%)   | 1 (0.9%)    |       |
| • Abnormal high ( > 50 IU/L in men; > 35 IU/L in women )      | 25 (14.5%)  | 7 (10.9%)  | 18 (16.5%)  |       |
| <b>Lactate dehydrogenase (LDH)</b>                            |             |            |             |       |
| • Normal ( 135 - 225 IU/L in men; 135 - 214 IU/L in women )   | 137 (80.1%) | 51 (81%)   | 86 (79.6%)  | 0.24  |
| • Abnormal low ( < 135 IU/L in men; < 135 IU/L in women )     | 5 (2.9%)    | 0 (0%)     | 5 (4.6%)    |       |
| • Abnormal high ( > 225 IU/L in men; > 214 IU/L in women )    | 29 (17%)    | 12 (19%)   | 17 (15.7%)  |       |
| <b>Creatinine kinase (CK)</b>                                 |             |            |             |       |
| • Normal ( 38 - 204 IU/L in men; 26 - 140 IU/L in women )     | 159 (91.9%) | 56 (87.5%) | 103 (94.5%) | 0.28  |
| • Abnormal low ( < 38 IU/L in men; < 26 IU/L in women )       | 2 (1.2%)    | 1 (1.6%)   | 1 (0.9%)    |       |
| • Abnormal high ( > 204 IU/L in men; > 140 IU/L in women )    | 12 (6.9%)   | 7 (10.9%)  | 5 (4.6%)    |       |
| <b>Gamma glutamyl transferase</b>                             |             |            |             |       |
| • Normal ( 10 - 71 IU/L in men; 6 - 42 IU/L in women )        | 161 (93.1%) | 60 (93.8%) | 101 (92.7%) | 0.426 |
| • Abnormal low ( < 10 IU/L in men; < 6 IU/L in women )        | 3 (1.7%)    | 0 (0%)     | 3 (2.8%)    |       |
| • Abnormal high ( > 71 IU/L in men; > 42 IU/L in women )      | 9 (5.2%)    | 4 (6.2%)   | 5 (4.6%)    |       |
| <b>Total protein</b>                                          |             |            |             |       |
| • Normal ( 63 - 83 g/L )                                      | 168 (97.1%) | 63 (98.4%) | 105 (96.3%) | 0.792 |



|                                                                 |             |            |             |       |
|-----------------------------------------------------------------|-------------|------------|-------------|-------|
| • Abnormal low ( < 63 g/L )                                     | 3 (1.7%)    | 1 (1.6%)   | 2 (1.8%)    |       |
| • Abnormal high ( > 83 g/L )                                    | 2 (1.2%)    | 0 (0%)     | 2 (1.8%)    |       |
| <b>Albumin</b>                                                  |             |            |             |       |
| • Normal ( 34 - 50 g/L )                                        | 162 (93.6%) | 59 (92.2%) | 103 (94.5%) | 0.538 |
| • Abnormal low ( < 34 g/L )                                     | 0 (0%)      | 0 (0%)     | 0 (0%)      |       |
| • Abnormal high ( > 50 g/L )                                    | 11 (6.4%)   | 5 (7.8%)   | 6 (5.5%)    |       |
| <b>Globulin</b>                                                 |             |            |             |       |
| • Normal ( 19 - 35 g/L )                                        | 168 (97.1%) | 61 (95.3%) | 107 (98.2%) | 0.616 |
| • Abnormal low ( < 19 g/L )                                     | 3 (1.7%)    | 2 (3.1%)   | 1 (0.9%)    |       |
| • Abnormal high ( > 35 g/L )                                    | 2 (1.2%)    | 1 (1.6%)   | 1 (0.9%)    |       |
| <b>Calcium</b>                                                  |             |            |             |       |
| • Normal ( 2.2 - 2.6 mmol/L )                                   | 167 (96.5%) | 62 (96.9%) | 105 (96.3%) | 0.525 |
| • Abnormal low ( < 2.2 mmol/L )                                 | 2 (1.2%)    | 0 (0%)     | 2 (1.8%)    |       |
| • Abnormal high ( > 2.6 mmol/L )                                | 4 (2.3%)    | 2 (3.1%)   | 2 (1.8%)    |       |
| <b>Magnesium</b>                                                |             |            |             |       |
| • Normal ( 0.6 - 1 mmol/L )                                     | 171 (98.8%) | 63 (98.4%) | 108 (99.1%) | 0.604 |
| • Abnormal low ( < 0.6 mmol/L )                                 | 1 (0.6%)    | 1 (1.6%)   | 0 (0%)      |       |
| • Abnormal high ( > 1 mmol/L )                                  | 1 (0.6%)    | 0 (0%)     | 1 (0.9%)    |       |
| <b>Phosphate</b>                                                |             |            |             |       |
| • Normal ( 0.87 - 1.45 mmol/L )                                 | 145 (83.8%) | 55 (85.9%) | 90 (82.6%)  | 0.824 |
| • Abnormal low ( < 0.87 mmol/L )                                | 23 (13.3%)  | 8 (12.5%)  | 15 (13.8%)  |       |
| • Abnormal high ( > 1.45 mmol/L )                               | 5 (2.9%)    | 1 (1.6%)   | 4 (3.7%)    |       |
| <b>Uric acid</b>                                                |             |            |             |       |
| • Normal ( 266 - 474 umol/L in men; 175 - 363 umol/L in women ) | 145 (83.8%) | 53 (82.8%) | 92 (84.4%)  | 0.804 |
| • Abnormal low ( < 266 umol/L in men; < 175 umol/L in women )   | 18 (10.4%)  | 8 (12.5%)  | 10 (9.2%)   |       |
| • Abnormal high ( > 474 umol/L in men; > 363 umol/L in women )  | 10 (5.8%)   | 3 (4.7%)   | 7 (6.4%)    |       |
| <b>Triglycerides</b>                                            |             |            |             |       |
| • Normal ( < 2.3 mmol/L )                                       | 10 (100%)   | 6 (100%)   | 4 (100%)    | N/A   |
| • Abnormal high ( > 2.3 mmol/L )                                | 0 (0%)      | 0 (0%)     | 0 (0%)      |       |
| <b>Fasting triglycerides</b>                                    |             |            |             |       |
| • Normal ( < 2.3 mmol/L )                                       | 144 (88.3%) | 52 (89.7%) | 92 (87.6%)  | 0.802 |
| • Abnormal high ( > 2.3 mmol/L )                                | 19 (11.7%)  | 6 (10.3%)  | 13 (12.4%)  |       |
| <b>Cholesterol</b>                                              |             |            |             |       |
| • Normal ( < 5 mmol/L )                                         | 4 (40%)     | 3 (50%)    | 1 (25%)     | 0.571 |
| • Abnormal high ( > 5 mmol/L )                                  | 6 (60%)     | 3 (50%)    | 3 (75%)     |       |
| <b>Fasting cholesterol</b>                                      |             |            |             |       |
| • Normal ( < 5 mmol/L )                                         | 96 (58.9%)  | 39 (67.2%) | 57 (54.3%)  | 0.135 |
| • Abnormal high ( > 5 mmol/L )                                  | 67 (41.1%)  | 19 (32.8%) | 48 (45.7%)  |       |
| <b>HDL cholesterol</b>                                          |             |            |             |       |
| • Normal ( 0.9 - 1.5 mmol/L in men; 1.2 - 1.7 mmol/L in women ) | 103 (59.5%) | 38 (59.4%) | 65 (59.6%)  | 0.539 |
| • Abnormal low ( < 0.9 mmol/L in men; < 1.2 mmol/L in women )   | 16 (9.2%)   | 4 (6.2%)   | 12 (11%)    |       |

|                                                                  |             |            |             |       |
|------------------------------------------------------------------|-------------|------------|-------------|-------|
| • Abnormal high ( > 1.5 mmol/L in men; > 1.7 mmol/L in women )   | 54 (31.2%)  | 22 (34.4%) | 32 (29.4%)  |       |
| <b>LDL cholesterol</b>                                           |             |            |             |       |
| • Normal (< 3 mmol/L )                                           | 111 (65.7%) | 45 (72.6%) | 66 (61.7%)  | 0.18  |
| • Abnormal high (> 3 mmol/L )                                    | 58 (34.3%)  | 17 (27.4%) | 41 (38.3%)  |       |
| <b>Iron</b>                                                      |             |            |             |       |
| • Normal ( 10.6 - 28.3 umol/L in men; 6.6 - 26 umol/L in women ) | 160 (92.5%) | 57 (89.1%) | 103 (94.5%) | 0.337 |
| • Abnormal low (< 10.6 umol/L in men; < 6.6 umol/L in women )    | 3 (1.7%)    | 2 (3.1%)   | 1 (0.9%)    |       |
| • Abnormal high (> 28.3 umol/L in men; > 26 umol/L in women )    | 10 (5.8%)   | 5 (7.8%)   | 5 (4.6%)    |       |
| <b>Total iron binding capacity (TIBC)</b>                        |             |            |             |       |
| • Normal ( 41 - 77 umol/L )                                      | 167 (97.1%) | 60 (93.8%) | 107 (99.1%) | 0.064 |
| • Abnormal low (< 41 umol/L )                                    | 0 (0%)      | 0 (0%)     | 0 (0%)      |       |
| • Abnormal high (> 77 umol/L )                                   | 5 (2.9%)    | 4 (6.2%)   | 1 (0.9%)    |       |
| <b>Transferrin saturation</b>                                    |             |            |             |       |
| • Normal ( 20 - 55 % )                                           | 135 (78.5%) | 50 (78.1%) | 85 (78.7%)  | 0.283 |
| • Abnormal low (< 20 % )                                         | 33 (19.2%)  | 11 (17.2%) | 22 (20.4%)  |       |
| • Abnormal high (> 55 % )                                        | 4 (2.3%)    | 3 (4.7%)   | 1 (0.9%)    |       |
| <b>High sensitivity CRP</b>                                      |             |            |             |       |
| • Normal ( 0 - 5 mg/L )                                          | 141 (92.2%) | 50 (96.2%) | 91 (90.1%)  | 0.223 |
| • Abnormal low (< 0 mg/L )                                       | 0 (0%)      | 0 (0%)     | 0 (0%)      |       |
| • Abnormal high (> 5 mg/L )                                      | 12 (7.8%)   | 2 (3.8%)   | 10 (9.9%)   |       |

Review only

## STROBE Statement—checklist of items that should be included in reports of observational studies

|                              | Item No | Recommendation                                                                                                                                                                                                                                                                                                                                                                                                                                                         | Pages                           |
|------------------------------|---------|------------------------------------------------------------------------------------------------------------------------------------------------------------------------------------------------------------------------------------------------------------------------------------------------------------------------------------------------------------------------------------------------------------------------------------------------------------------------|---------------------------------|
| <b>Title and abstract</b>    | 1       | (a) Indicate the study's design with a commonly used term in the title or the abstract                                                                                                                                                                                                                                                                                                                                                                                 | 3                               |
|                              |         | (b) Provide in the abstract an informative and balanced summary of what was done and what was found                                                                                                                                                                                                                                                                                                                                                                    | 3                               |
| <b>Introduction</b>          |         |                                                                                                                                                                                                                                                                                                                                                                                                                                                                        |                                 |
| Background/rationale         | 2       | Explain the scientific background and rationale for the investigation being reported                                                                                                                                                                                                                                                                                                                                                                                   | 4                               |
| Objectives                   | 3       | State specific objectives, including any prespecified hypotheses                                                                                                                                                                                                                                                                                                                                                                                                       | 4                               |
| <b>Methods</b>               |         |                                                                                                                                                                                                                                                                                                                                                                                                                                                                        |                                 |
| Study design                 | 4       | Present key elements of study design early in the paper                                                                                                                                                                                                                                                                                                                                                                                                                | 5                               |
| Setting                      | 5       | Describe the setting, locations, and relevant dates, including periods of recruitment, exposure, follow-up, and data collection                                                                                                                                                                                                                                                                                                                                        | 5                               |
| Participants                 | 6       | (a) <i>Cohort study</i> —Give the eligibility criteria, and the sources and methods of selection of participants. Describe methods of follow-up<br><i>Case-control study</i> —Give the eligibility criteria, and the sources and methods of case ascertainment and control selection. Give the rationale for the choice of cases and controls<br><i>Cross-sectional study</i> —Give the eligibility criteria, and the sources and methods of selection of participants | 5                               |
|                              |         | (b) <i>Cohort study</i> —For matched studies, give matching criteria and number of exposed and unexposed<br><i>Case-control study</i> —For matched studies, give matching criteria and the number of controls per case                                                                                                                                                                                                                                                 | 3                               |
| Variables                    | 7       | Clearly define all outcomes, exposures, predictors, potential confounders, and effect modifiers. Give diagnostic criteria, if applicable                                                                                                                                                                                                                                                                                                                               | 8                               |
| Data sources/<br>measurement | 8*      | For each variable of interest, give sources of data and details of methods of assessment (measurement). Describe comparability of assessment methods if there is more than one group                                                                                                                                                                                                                                                                                   | 5-6 and supplementary           |
| Bias                         | 9       | Describe any efforts to address potential sources of bias                                                                                                                                                                                                                                                                                                                                                                                                              | 10                              |
| Study size                   | 10      | Explain how the study size was arrived at                                                                                                                                                                                                                                                                                                                                                                                                                              | Ongoing study                   |
| Quantitative variables       | 11      | Explain how quantitative variables were handled in the analyses. If applicable, describe which groupings were chosen and why                                                                                                                                                                                                                                                                                                                                           | 6                               |
| Statistical methods          | 12      | (a) Describe all statistical methods, including those used to control for confounding                                                                                                                                                                                                                                                                                                                                                                                  | 6                               |
|                              |         | (b) Describe any methods used to examine subgroups and interactions                                                                                                                                                                                                                                                                                                                                                                                                    | 6                               |
|                              |         | (c) Explain how missing data were addressed                                                                                                                                                                                                                                                                                                                                                                                                                            | 10                              |
|                              |         | (d) <i>Cohort study</i> —If applicable, explain how loss to follow-up was addressed                                                                                                                                                                                                                                                                                                                                                                                    | n/a ongoing observational study |

|                          |     |                                                                                                                                                                                                              |               |
|--------------------------|-----|--------------------------------------------------------------------------------------------------------------------------------------------------------------------------------------------------------------|---------------|
|                          |     | <i>Case-control study</i> —If applicable, explain how matching of cases and controls was addressed                                                                                                           |               |
|                          |     | <i>Cross-sectional study</i> —If applicable, describe analytical methods taking account of sampling strategy                                                                                                 |               |
|                          |     | (e) Describe any sensitivity analyses                                                                                                                                                                        | n/a           |
| <b>Results</b>           |     |                                                                                                                                                                                                              |               |
| Participants             | 13* | (a) Report numbers of individuals at each stage of study—eg numbers potentially eligible, examined for eligibility, confirmed eligible, included in the study, completing follow-up, and analysed            | 7<br>Figure 1 |
|                          |     | (b) Give reasons for non-participation at each stage                                                                                                                                                         | Figure 1      |
|                          |     | (c) Consider use of a flow diagram                                                                                                                                                                           | Figure 1      |
| Descriptive data         | 14* | (a) Give characteristics of study participants (eg demographic, clinical, social) and information on exposures and potential confounders                                                                     | Table 1       |
|                          |     | (b) Indicate number of participants with missing data for each variable of interest                                                                                                                          | Table 1       |
|                          |     | (c) <i>Cohort study</i> —Summarise follow-up time (eg, average and total amount)                                                                                                                             | Table 1       |
| Outcome data             | 15* | <i>Cohort study</i> —Report numbers of outcome events or summary measures over time                                                                                                                          | Table 1       |
|                          |     | <i>Case-control study</i> —Report numbers in each exposure category, or summary measures of exposure                                                                                                         | Table 1       |
|                          |     | <i>Cross-sectional study</i> —Report numbers of outcome events or summary measures                                                                                                                           | n/a           |
| Main results             | 16  | (a) Give unadjusted estimates and, if applicable, confounder-adjusted estimates and their precision (eg, 95% confidence interval). Make clear which confounders were adjusted for and why they were included | 8             |
|                          |     | (b) Report category boundaries when continuous variables were categorized                                                                                                                                    | Table 2       |
|                          |     | (c) If relevant, consider translating estimates of relative risk into absolute risk for a meaningful time period                                                                                             | n/a           |
| Other analyses           | 17  | Report other analyses done—eg analyses of subgroups and interactions, and sensitivity analyses                                                                                                               | n/a           |
| <b>Discussion</b>        |     |                                                                                                                                                                                                              |               |
| Key results              | 18  | Summarise key results with reference to study objectives                                                                                                                                                     | 9             |
| Limitations              | 19  | Discuss limitations of the study, taking into account sources of potential bias or imprecision. Discuss both direction and magnitude of any potential bias                                                   | 10            |
| Interpretation           | 20  | Give a cautious overall interpretation of results considering objectives, limitations, multiplicity of analyses, results from similar studies, and other relevant evidence                                   | 10            |
| Generalisability         | 21  | Discuss the generalisability (external validity) of the study results                                                                                                                                        | 10            |
| <b>Other information</b> |     |                                                                                                                                                                                                              |               |
| Funding                  | 22  | Give the source of funding and the role of the funders for the present study and, if applicable, for the original study on which the present article is based                                                | 12            |

1  
2 \*Give information separately for cases and controls in case-control studies and, if applicable, for exposed and  
3 unexposed groups in cohort and cross-sectional studies.  
4

5  
6 **Note:** An Explanation and Elaboration article discusses each checklist item and gives methodological background and  
7 published examples of transparent reporting. The STROBE checklist is best used in conjunction with this article (freely  
8 available on the Web sites of PLoS Medicine at <http://www.plosmedicine.org/>, Annals of Internal Medicine at  
9 <http://www.annals.org/>, and Epidemiology at <http://www.epidem.com/>). Information on the STROBE Initiative is  
10 available at [www.strobe-statement.org](http://www.strobe-statement.org).  
11  
12  
13  
14  
15  
16  
17  
18  
19  
20  
21  
22  
23  
24  
25  
26  
27  
28  
29  
30  
31  
32  
33  
34  
35  
36  
37  
38  
39  
40  
41  
42  
43  
44  
45  
46  
47  
48  
49  
50  
51  
52  
53  
54  
55  
56  
57  
58  
59  
60
